# Supplementary material for: Rhodium(iii)-catalyzed three-component C(sp2)–H activation for the synthesis of amines
Source: Royal Society of Chemistry journal article supplement (doi:10.1039/d3cc04665f), 2023-01-01

## Electronic Supplementary Information

# Rhodium(III)-Catalyzed Three-component C(sp<sup>2</sup>)-H Activation to Synthesis Amines

Min Lin,<sup>‡</sup> Yu-Fei Wu,<sup>‡</sup> Zheng-Qiang Liu, Cheng Liang, Qing-Hua Li\* and Tang-Lin Liu\*

\* School of Chemistry and Chemical Engineering, Southwest University, Chongqing 400715,  
China, Email: liuschop@swu.edu.cn; liqinghua@swu.edu.cn

## Table of contents

|                                                          |    |
|----------------------------------------------------------|----|
| 1. General information.....                              | 2  |
| 2. General Procedure .....                               | 3  |
| 3. Reaction optimization.....                            | 4  |
| 4.The analytical and spectral characterization data..... | 7  |
| 5. References.....                                       | 23 |
| 6. NMR spectra.....                                      | 24 |

## 1. General information

All reactions were run under a dry argon atmosphere fitted on a glass tube or vial. For thin layer chromatography (TLC), Qingdao Haiyang Chemical was used, and compounds were visualized with a UV light at 254 nm. Further visualization was achieved by staining with iodine, or phosphomolybdic acid solution followed by heating using a heat gun. Flash chromatography separations were performed on Qingdao Haiyang Chemical 200-300 mesh silica gel. High resolution mass spectra (HRMS) were recorded on a Bruker 19A01643 (impact II) spectrometer. All new compounds were characterized by  $^1\text{H}$  NMR,  $^{13}\text{C}$  NMR, and HRMS. The known compounds were characterized by  $^1\text{H}$  NMR,  $^{13}\text{C}$  NMR.  $^1\text{H}$  NMR and  $^{13}\text{C}$  NMR spectra were recorded on a Bruker Avance 600 MHz instruments. Chemical shifts were reported in parts per million (ppm), and the residual solvent peak was used as an internal reference: proton (chloroform  $\delta$  7.26), carbon (chloroform  $\delta$  77.0) or tetramethylsilane (TMS  $\delta$  0.00) was used as a reference. Multiplicity was indicated as follows: s (singlet), d (doublet), t (triplet), q (quartet), m (multiplet), dd (doublet of doublet), bs (broad singlet). Coupling constants were reported in Hertz (Hz).

**Materials:**  $[\text{Cp}^*\text{RhCl}_2]_2$  (CAS Nu: 12354-85-7) was purchased from LaaJoo. The  $\text{CuOAc}$  was purchased from Alfa Aesar. Unless otherwise noted,  $\text{TsOH}$ ,  $\text{AgSbF}_6$  and solvent were obtained from commercial suppliers and used without further purification. 2-Aryl pyridines are synthesis via the known procedures<sup>1-2</sup>. All solvents were dried by the procedure of reagent purification manual.

## 2. General Procedure

**General procedure for three-component C-H bond activation of aromatics with amides and aldehydes to synthesize sulfonamides**

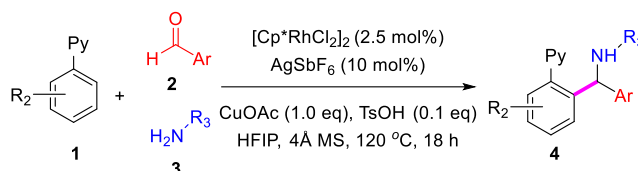

To a vial equipped with a dried stir bar was added 2-aryl pyridines **1** (0.1 mmol), aldehydes **2** (0.2 mmol), amides **3** (0.15 mmol),  $[\text{RhCp}^*\text{Cl}_2]_2$  (2.5 mol%),  $\text{AgSbF}_6$  (10 mol%),  $\text{CuOAc}$  (1.0 equiv),  $\text{TsOH}$  (1.0 equiv), HFIP (0.2 mL) in the glovebox. The reaction mixture was taken outside the glovebox and allowed to stir at 120 °C (oil bath) for 18 h. The reaction mixture quenched with saturated aqueous  $\text{Na}_2\text{CO}_3$  solution. The solution was extracted with  $\text{CH}_2\text{Cl}_2$  (3\*3 mL). The combined organic layer was dried over anhydrous  $\text{Na}_2\text{SO}_4$ , filtered and concentrated under reduced pressure. The crude material was concentrated in vacuo and separated on a silica gel column affording the desired product **4**.

### 3. Reaction optimization

**Table S1.** Catalyst screening of the reaction **1a**, **2a** and **3a**.

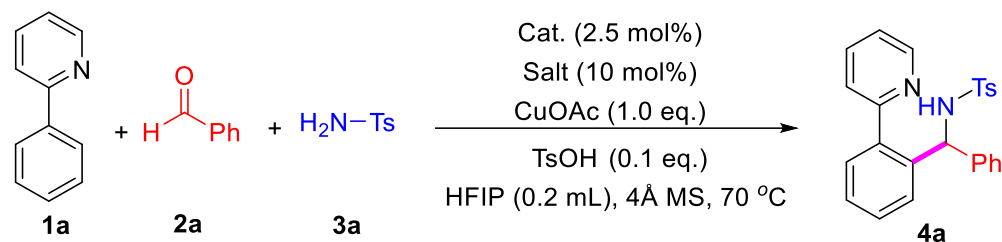

| Entry          | Cat. (2.5 mol%)                                                                        | Salt (10 mol%)           | Yield      |
|----------------|----------------------------------------------------------------------------------------|--------------------------|------------|
| 1              | [Mn(CO) <sub>5</sub> ]Br                                                               | AgSbF <sub>6</sub>       | ND         |
| 2              | [Cp* <sup>Rh</sup> (CH <sub>3</sub> CN) <sub>3</sub> ][SbF <sub>6</sub> ] <sub>2</sub> | AgSbF <sub>6</sub>       | ND         |
| 3              | Cp* <sup>Co</sup> (CO)I <sub>2</sub>                                                   | AgSbF <sub>6</sub>       | ND         |
| <b>4</b>       | <b>[Cp*<sup>Rh</sup>Cl<sub>2</sub>]<sub>2</sub></b>                                    | <b>AgSbF<sub>6</sub></b> | <b>61%</b> |
| 5 <sup>a</sup> | [Cp* <sup>Rh</sup> Cl <sub>2</sub> ] <sub>2</sub>                                      | AgSbF <sub>6</sub>       | 51%        |
| 6 <sup>b</sup> | [Cp* <sup>Rh</sup> Cl <sub>2</sub> ] <sub>2</sub>                                      | AgSbF <sub>6</sub>       | 60%        |
| 7              | [Cp* <sup>Rh</sup> Cl <sub>2</sub> ] <sub>2</sub>                                      | AgF <sub>6</sub> P       | 43%        |
| 8              | [Cp* <sup>Rh</sup> Cl <sub>2</sub> ] <sub>2</sub>                                      | CF <sub>3</sub> COOAg    | 51%        |
| 9              | [Cp* <sup>Rh</sup> Cl <sub>2</sub> ] <sub>2</sub>                                      | AgOAc                    | 40%        |
| 10             | [Cp* <sup>Rh</sup> Cl <sub>2</sub> ] <sub>2</sub>                                      | AgBF <sub>4</sub>        | 21%        |

Reaction conditions: 0.1 mmol of **1a**, 0.2 mmol of **2a**, 0.15 mmol of **3a**, 0.1 equiv TsOH in 0.2 mL solvent under N<sub>2</sub> at corresponding temperature (oil bath) for 18 h. Isolated yields. <sup>a</sup>2.5 mol% of [Cp\*<sup>Rh</sup>Cl<sub>2</sub>]<sub>2</sub> and 20 mol% of AgSbF<sub>6</sub> catalyst were used. <sup>b</sup>5 mol% of [Cp\*<sup>Rh</sup>Cl<sub>2</sub>]<sub>2</sub> and 10 mol% of AgSbF<sub>6</sub> catalyst were used.

**Table S2.** Additive screening of the reaction **1a**, **2a** and **3a**.

Reaction scheme showing the synthesis of **4a** from **1a**, **2a**, and **3a**. Reagents:  $[\text{Cp}^*\text{RhCl}_2]_2$  (2.5 mol%),  $\text{AgSbF}_6$  (10 mol%), Additive (x eq.), 4Å MS, HFIP (0.2 mL), 70 °C.

| Entry    | Add.                                                                        | Yield      |
|----------|-----------------------------------------------------------------------------|------------|
| 1        | TsOH (0.1 eq.) CuOAc (0.5 eq.)                                              | 45%        |
| <b>2</b> | <b>TsOH (0.1 eq.) CuOAc (1.0 eq.)</b>                                       | <b>61%</b> |
| 3        | TsOH (0.1 eq.) CuOAc (2.0 eq.)                                              | 43%        |
| 4        | TsOH (0.5 eq.) CuOAc (1.0 eq.)                                              | 21%        |
| 5        | $\text{CH}_3\text{CH}_2\text{COOH}$ (0.1 eq.) CuOAc (1.0 eq.)               | trace      |
| 6        | TsOH (0.1 eq.) $\text{Cu}(\text{OTf})_2$ (1.0 eq.)                          | ND         |
| 7        | TsOH (0.1 eq.) $\text{Cu}(\text{OAc})_2$ (1.0 eq.)                          | ND         |
| 8        | TsOH (0.1 eq.) $\text{CuCl}$ (1.0 eq.)                                      | trace      |
| 9        | TsOH (0.1 eq.) $\text{Cu}_2\text{O}$ (1.0 eq.)                              | 49%        |
| 10       | TsOH (0.1 eq.) $[\text{Cu}(\text{CH}_3\text{CN})_4][\text{PF}_6]$ (1.0 eq.) | trace      |

Reaction conditions: 0.1 mmol of **1a**, 0.2 mmol of **2a**, 0.15 mmol of **3a**, 0.1 equiv TsOH in 0.2 mL solvent under  $\text{N}_2$  at corresponding temperature (oil bath) for 18 h. Isolated yields.

**Table S3.** Solvent screening of the reaction **1a**, **2a** and **3a**.

Reaction scheme showing the synthesis of **4a** from **1a**, **2a**, and **3a**. Reagents:  $[\text{Cp}^*\text{RhCl}_2]_2$  (2.5 mol%),  $\text{AgSbF}_6$  (10 mol%),  $\text{CuOAc}$  (1.0 eq.),  $\text{TsOH}$  (0.1 eq.), Solvent (0.2 mL), 4Å MS, 70 °C.

| Entry    | Solvent                           | Yield      |
|----------|-----------------------------------|------------|
| 1        | $\text{CH}_2\text{Cl}_2$          | ND         |
| 2        | DCE                               | trace      |
| 3        | Toluene                           | 33%        |
| 4        | 1,4-Dioxane                       | trace      |
| 5        | THF                               | ND         |
| 6        | $\text{CH}_3\text{CH}_2\text{OH}$ | 21%        |
| 7        | $\text{CF}_3\text{CH}_2\text{OH}$ | 31%        |
| 7        | t-BuOH                            | 44%        |
| 8        | t-Amyl-OH                         | trace      |
| <b>9</b> | <b>HFIP</b>                       | <b>61%</b> |

Reaction conditions: 0.1 mmol of **1a**, 0.2 mmol of **2a**, 0.15 mmol of **3a**, 0.1 equiv  $\text{TsOH}$  in 0.2 mL solvent under  $\text{N}_2$  at corresponding temperature (oil bath) for 18 h. Isolated yields.

**Table S4.** Temperature screening of the reaction **1a**, **2a** and **3a**.

| Entry    | T/°C       | Yield      |
|----------|------------|------------|
| <b>1</b> | <b>120</b> | <b>71%</b> |
| 2        | 110        | 70%        |
| 3        | 100        | 65%        |
| 4        | 70         | 61%        |
| 5        | 60         | 43%        |

Reaction conditions: 0.1 mmol of **1a**, 0.2 mmol of **2a**, 0.15 mmol of **3a**, 0.1 equiv TsOH in 0.2 mL solvent under N<sub>2</sub> at corresponding temperature (oil bath) for 18 h. Isolated yields.

#### 4. The analytical and spectral characterization data

##### 4-Methyl-N-(phenyl(2-(pyridin-2-yl)phenyl)methyl)benzenesulfonamide (**4a**)<sup>3</sup>

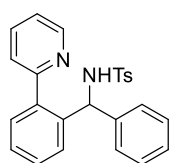

The title compound was prepared according to the general procedure as described. Silica gel flash column chromatography was performed using hexanes and ethyl acetate (10:1) resulting in 29.4 mg (71% yield).

<sup>1</sup>H NMR (600 MHz, CDCl<sub>3</sub>) δ 8.76 (d, *J* = 9.5 Hz, 1H), 8.52 (d, *J* = 3.5 Hz, 1H), 7.61 (d, *J* = 8.1 Hz, 2H), 7.44 (t, *J* = 7.7 Hz, 1H), 7.26-7.20 (m, 2H), 7.10-7.00 (m, 5H), 6.95-6.86 (m, 6H), 5.71 (d, *J* = 9.5 Hz, 1H), 2.33 (s, 3H).

<sup>13</sup>C NMR (151 MHz, CDCl<sub>3</sub>) δ 159.9, 147.6, 142.3, 140.8, 140.0, 139.6, 138.9, 136.9, 131.4, 131.1, 129.1, 128.2, 127.6, 127.4, 127.0, 126.2, 126.0, 124.5, 121.9, 61.4, 21.4.

**N-((4-Fluorophenyl)(2-(pyridin-2-yl)phenyl)methyl)-4-methylbenzenesulfonamide (4b)<sup>3</sup>**

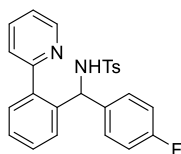

The title compound was prepared according to the general procedure as described. Silica gel flash column chromatography was performed using hexanes and ethyl acetate (10:1) resulting in 23.3 mg (54% yield).

<sup>1</sup>H NMR (600 MHz, CDCl<sub>3</sub>) δ 8.88 (d, *J* = 9.5 Hz, 1H), 8.52 (d, *J* = 4.8 Hz, 1H), 7.60 (d, *J* = 7.8 Hz, 2H), 7.49 (t, *J* = 7.8 Hz, 1H), 7.28-7.25 (m, 1H), 7.22 (d, *J* = 7.5 Hz, 1H), 7.12-7.03 (m, 4H), 6.98 (d, *J* = 7.6 Hz, 1H), 6.91 (t, *J* = 6.9 Hz, 3H), 6.61 (t, *J* = 8.5 Hz, 2H), 5.65 (d, *J* = 9.1 Hz, 1H), 2.33 (s, 3H).

<sup>13</sup>C NMR (151 MHz, CDCl<sub>3</sub>) δ 161.3 (d, *J* = 244.9 Hz), 159.8, 147.5, 142.4, 139.7, 139.5, 138.8, 137.1, 136.6 (d, *J* = 3.2 Hz), 131.5, 131.1, 129.1, 128.3, 127.8, 127.6 (d, *J* = 8.0 Hz), 126.9, 124.4, 122.0, 114.1 (d, *J* = 21.4 Hz), 61.0, 21.4.

<sup>19</sup>F NMR (565 MHz, CDCl<sub>3</sub>) δ -116.96.

**N-((4-Chlorophenyl)(2-(pyridin-2-yl)phenyl)methyl)-4-methylbenzenesulfonamide (4c)<sup>3</sup>**

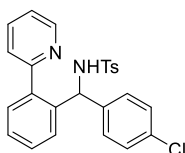

The title compound was prepared according to the general procedure as described. Silica gel flash column chromatography was performed using hexanes and ethyl acetate (10:1) resulting in 33.6 mg (75% yield).

<sup>1</sup>H NMR (600 MHz, CDCl<sub>3</sub>) δ 8.88 (d, *J* = 9.6 Hz, 1H), 8.52 (d, *J* = 4.3 Hz, 1H), 7.60 (d, *J* = 8.3 Hz, 2H), 7.50 (td, *J* = 7.8 Hz, 1.8 Hz, 1H), 7.28-7.22 (m, 2H), 7.14-7.10 (m, 1H), 7.09-7.05 (m, 3H), 6.98 (d, *J* = 7.7 Hz, 1H), 6.93 (d, *J* = 7.9 Hz, 1H), 6.89 (s, 4H), 5.64 (d, *J* = 9.5 Hz, 1H), 2.33 (s, 3H).

<sup>13</sup>C NMR (151 MHz, CDCl<sub>3</sub>) δ 159.7, 147.5, 142.5, 139.5, 139.4, 139.4, 138.8, 137.2, 132.1, 131.5, 131.2, 129.1, 128.3, 127.9, 127.5, 127.4, 126.9, 124.5, 122.1, 61.1, 21.4.



**N-((4-Bromophenyl)(2-(pyridin-2-yl)phenyl)methyl)-4-methylbenzenesulfonamide (4d)<sup>3</sup>**

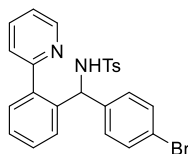

The title compound was prepared according to the general procedure as described. Silica gel flash column chromatography was performed using hexanes and ethyl acetate (10:1) resulting in 41.3 mg (84% yield).

<sup>1</sup>H NMR (600 MHz, CDCl<sub>3</sub>) δ 8.93 (d, *J* = 9.6 Hz, 1H), 8.52 (d, *J* = 4.8 Hz, 1H), 7.60 (d, *J* = 7.8 Hz, 2H), 7.51 (t, *J* = 7.8 Hz, 1H), 7.23 (d, *J* = 7.8 Hz, 1H), 7.13 (t, *J* = 6 Hz, 1H), 7.10-7.02 (m, 6H), 6.97 (d, *J* = 7.8 Hz, 1H), 6.93 (d, *J* = 8.4 Hz, 1H), 6.83 (d, *J* = 7.8 Hz, 2H), 5.61 (d, *J* = 9.6 Hz, 1H), 2.34 (s, 3H).

<sup>13</sup>C NMR (151 MHz, CDCl<sub>3</sub>) δ 159.7, 147.5, 142.5, 140.0, 139.4, 139.3, 138.6, 137.2, 131.5, 131.2, 130.4, 129.2, 128.3, 128.0, 127.8, 126.9, 124.5, 122.2, 120.2, 61.2, 21.4.

**4-Methyl-N-(((2-(pyridin-2-yl)phenyl)(p-tolyl)methyl)benzenesulfonamide (4e)<sup>3</sup>**

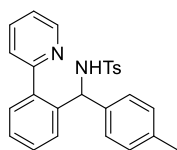

The title compound was prepared according to the general procedure as described. Silica gel flash column chromatography was performed using hexanes and ethyl acetate (10:1) resulting in 27.0 mg (63% yield).

<sup>1</sup>H NMR (600 MHz, CDCl<sub>3</sub>) δ 8.59 (d, *J* = 9.0 Hz, 1H), 8.53 (d, *J* = 4.8 Hz, 1H), 7.60 (d, *J* = 7.8 Hz, 2H), 7.46 (td, *J* = 7.8 Hz, 1.8 Hz, 1H), 7.28-7.18 (m, 2H), 7.10-7.00 (m, 5H), 6.92 (d, *J* = 7.8 Hz, 1H), 6.80 (d, *J* = 8.4 Hz, 2H), 6.73 (d, *J* = 7.8 Hz, 2H), 5.68 (d, *J* = 8.4 Hz, 1H), 2.33 (s, 3H), 2.12 (s, 3H).

<sup>13</sup>C NMR (151 MHz, CDCl<sub>3</sub>) δ 159.9, 147.6, 142.3, 139.9, 139.5, 138.7, 137.7, 136.9, 135.7, 131.3, 130.9, 129.1, 128.2, 128.1, 127.6, 127.0, 126.0, 124.5, 121.9, 61.1, 21.4, 20.8.

**Methyl 4-(((4-methylphenyl)sulfonamido)(2-(pyridin-2-yl)phenyl)methyl)benzoate (4f)<sup>4</sup>**

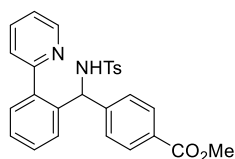

The title compound was prepared according to the general procedure as described. Silica gel flash column chromatography was performed using hexanes and ethyl acetate (5:1) resulting in 30.7 mg (65% yield).

$^1\text{H}$  NMR (600 MHz,  $\text{CDCl}_3$ )  $\delta$  9.02 (d,  $J = 9.6$  Hz, 1H), 8.51 (d,  $J = 3.0$  Hz, 1H), 7.60 (dd,  $J = 13.8$  Hz, 8.4 Hz, 4H), 7.44 (td,  $J = 7.2$  Hz, 1.8 Hz, 1H), 7.32-7.19 (m, 2H), 7.12-6.98 (m, 7H), 6.89 (d,  $J = 7.8$  Hz, 1H), 5.70 (d,  $J = 9.6$  Hz, 1H), 3.82 (s, 3H), 2.34 (s, 3H).

$^{13}\text{C}$  NMR (151 MHz,  $\text{CDCl}_3$ )  $\delta$  166.8, 159.6, 147.5, 146.2, 142.5, 139.4, 139.3, 137.2, 131.5, 131.4, 129.1, 128.7, 128.4, 128.0, 126.9, 126.0, 124.5, 122.2, 61.6, 51.9, 21.4.

**N-([1,1'-Biphenyl]-4-yl(2-(pyridin-2-yl)phenyl)methyl)-4-methylbenzenesulfonamide (4g)<sup>5</sup>**

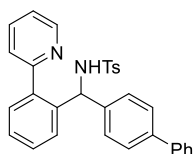

The title compound was prepared according to the general procedure as described. Silica gel flash column chromatography was performed using hexanes and ethyl acetate (5:1) resulting in 31.9 mg (65% yield).

$^1\text{H}$  NMR (600 MHz,  $\text{CDCl}_3$ )  $\delta$  8.72 (d,  $J = 9.0$  Hz, 1H), 8.54 (d,  $J = 3.0$  Hz, 1H), 7.63 (d,  $J = 7.8$  Hz, 2H), 7.44-7.39 (m, 3H), 7.36 (t,  $J = 7.2$  Hz, 2H), 7.30-7.20 (m, 3H), 7.16 (d,  $J = 8.4$  Hz, 2H), 7.13-7.02 (m, 5H), 6.99 (d,  $J = 8.4$  Hz, 2H), 6.91 (d,  $J = 7.8$  Hz, 1H), 5.75 (d,  $J = 9$  Hz, 1H), 2.33 (s, 3H).

$^{13}\text{C}$  NMR (151 MHz,  $\text{CDCl}_3$ )  $\delta$  159.9, 147.6, 142.4, 140.8, 140.0, 139.9, 139.6, 139.0, 138.9, 136.9, 131.4, 131.0, 129.1, 128.6, 128.3, 127.7, 127.1, 127.0, 126.8, 126.5, 126.1, 124.5, 121.9, 61.2, 21.4.

**4-Methyl-N-((2-(pyridin-2-yl)phenyl)(4-(trifluoromethyl)phenyl)methyl)benzenesulfonamide (4h)<sup>5</sup>**

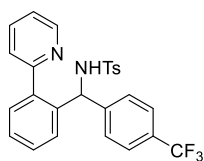

The title compound was prepared according to the general procedure as described. Silica gel flash column chromatography was performed using hexanes and ethyl acetate (10:1) resulting in 43.4 mg (90% yield).

$^1\text{H}$  NMR (600 MHz,  $\text{CDCl}_3$ )  $\delta$  8.90 (d,  $J = 9.6$  Hz, 1H), 8.52 (d,  $J = 4.8$  Hz, 1H), 7.61 (d,  $J = 7.8$  Hz, 2H), 7.45 (t,  $J = 7.8$  Hz, 1H), 7.33-7.21 (m, 2H), 7.17 (d,  $J = 7.8$  Hz, 2H), 7.13-7.05 (m, 6H), 7.00 (d,  $J = 7.8$  Hz, 1H), 6.88 (d,  $J = 7.8$  Hz, 1H), 5.71 (d,  $J = 9.6$  Hz, 1H), 2.34 (s, 3H).

$^{13}\text{C}$  NMR (151 MHz,  $\text{CDCl}_3$ )  $\delta$  159.6, 147.6, 145.1, 142.6, 139.4, 139.2, 138.7, 137.1, 131.5, 131.3, 129.2, 128.4, 128.2 (q,  $J = 31.4$  Hz), 128.1, 126.9, 126.4, 124.5, 124.2 (q,  $J = 3.9$  Hz), 123.4 (q,  $J = 271.8$  Hz), 122.2, 61.3, 21.4.

$^{19}\text{F}$  NMR (565 MHz,  $\text{CDCl}_3$ )  $\delta$  -62.60.

#### **N-((3-Chlorophenyl)(2-(pyridin-2-yl)phenyl)methyl)-4-methylbenzenesulfonamide (4i)<sup>4</sup>**

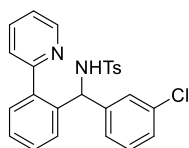

The title compound was prepared according to the general procedure as described. Silica gel flash column chromatography was performed using hexanes and ethyl acetate (5:1) resulting in 33.6 mg (75% yield).

$^1\text{H}$  NMR (600 MHz,  $\text{CDCl}_3$ )  $\delta$  8.86 (d,  $J = 9.6$  Hz, 1H), 8.55 (d,  $J = 5.4$  Hz, 1H), 7.61 (d,  $J = 8.4$  Hz, 2H), 7.49 (td,  $J = 7.7$  Hz, 1.8 Hz, 1H), 7.28 (d,  $J = 7.6$  Hz, 1H), 7.23 (d,  $J = 7.2$  Hz, 1H), 7.15-7.04 (m, 4H), 6.98 (d,  $J = 7.6$  Hz, 1H), 6.92 (d,  $J = 7.8$  Hz, 1H), 6.90-6.81 (m, 4H), 5.65 (d,  $J = 9.6$  Hz, 1H), 2.34 (s, 3H).

$^{13}\text{C}$  NMR (151 MHz,  $\text{CDCl}_3$ )  $\delta$  159.7, 147.6, 143.0, 142.5, 139.5, 139.3, 138.8, 137.1, 133.5, 131.4, 131.2, 129.1, 128.6, 128.3, 128.0, 126.9, 126.4, 126.3, 124.4, 124.4, 122.1, 61.2, 21.4.

#### **4-Methyl-N-((2-(pyridin-2-yl)phenyl)(m-tolyl)methyl)benzenesulfonamide (4j)<sup>5</sup>**

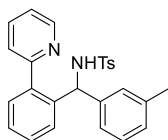

The title compound was prepared according to the general procedure as described. Silica gel flash column chromatography was performed using hexanes and ethyl acetate (5:1) resulting in 22.3 mg (52% yield).

$^1\text{H}$  NMR (600 MHz,  $\text{CDCl}_3$ )  $\delta$  8.63 (d,  $J = 9.6$  Hz, 1H), 8.54 (d,  $J = 4.8$  Hz, 1H), 7.60 (d,  $J = 8.4$  Hz, 2H), 7.45 (t,  $J = 6$  Hz, 1H), 7.24 (d,  $J = 7.2$  Hz, 1H), 7.20 (d,  $J = 6$  Hz, 1H), 7.12-6.98 (m, 5H), 6.88 (d,  $J = 7.8$  Hz, 1H), 6.80 (t,  $J = 7.8$  Hz, 1H), 6.71 (d,  $J = 11.4$  Hz, 2H), 6.65 (d,  $J = 7.8$  Hz, 1H), 5.67 (d,  $J = 8.4$  Hz, 1H), 2.33 (s, 3H), 2.05 (s, 3H).

$^{13}\text{C}$  NMR (151 MHz,  $\text{CDCl}_3$ )  $\delta$  160.0, 147.5, 142.3, 140.6, 140.0, 139.6, 138.9, 136.8, 131.2, 130.9, 129.1, 128.2, 127.6, 127.3, 127.0, 126.9, 126.7, 124.5, 123.3, 121.8, 61.3, 21.3, 21.1.

#### **N-((2-chlorophenyl)(2-(pyridin-2-yl)phenyl)methyl)-4-methylbenzenesulfonamide(4k)**

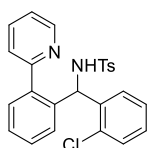

The title compound was prepared according to the general procedure as described. Silica gel flash column chromatography was performed using hexanes and ethyl acetate (5:1) resulting in 29.1 mg (65% yield).

$^1\text{H}$  NMR (600 MHz,  $\text{CDCl}_3$ )  $\delta$  8.65 (d,  $J = 4.9$  Hz, 1H), 7.85 (d,  $J = 8.4$  Hz, 1H), 7.64 (d,  $J = 9$  Hz, 2H), 7.51 (t,  $J = 7.2$  Hz, 1H), 7.25-7.19 (m, 2H), 7.17 (d,  $J = 8.4$  Hz, 1H), 7.12 (t,  $J = 7.8$  Hz, 4H), 7.04 (d,  $J = 7.8$  Hz, 1H), 6.95-6.89 (m, 3H), 6.74 (t,  $J = 7.2$  Hz, 1H), 5.90 (d,  $J = 7.8$  Hz, 1H), 2.36 (s, 3H).

$^{13}\text{C}$  NMR (101 MHz,  $\text{CDCl}_3$ )  $\delta$  142.7, 138.4, 137.8, 137.6, 137.0, 132.2, 131.8, 130.9, 129.7, 129.4, 129.2, 128.4, 128.0, 127.9, 127.6, 127.1, 126.5, 125.5, 59.1, 21.4.

**HRMS(ESI):**  $m/z$  Calcd. for  $\text{C}_{25}\text{H}_{21}\text{ClN}_2\text{O}_2\text{S}$   $[\text{M}+\text{H}]^+$ : 449.1085; Found: 449.1084.

#### **4-Methyl-N-(naphthalen-2-yl(2-(pyridin-2-yl)phenyl)methyl)benzenesulfonamide (4l)<sup>5</sup>**

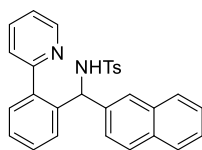

The title compound was prepared according to the general procedure as described. Silica gel flash column chromatography was performed using hexanes and ethyl acetate (5:1) resulting in 27.8 mg (60% yield).

$^1\text{H}$  NMR (600 MHz,  $\text{CDCl}_3$ )  $\delta$  8.86 (d,  $J = 9.6$  Hz, 1H), 8.55 (d,  $J = 4.8$  Hz, 1H), 7.65-7.58 (m, 3H), 7.48 (t,  $J = 5.4$  Hz, 1H), 7.42 (d,  $J = 9$  Hz, 1H), 7.37 (s, 1H), 7.34-7.30 (m, 2H), 7.29 (d,  $J = 7.8$  Hz, 1H), 7.24-7.19 (m, 2H), 7.14-6.94 (m, 6H), 6.82 (d,  $J = 7.8$  Hz, 1H), 5.85 (d,  $J = 9$  Hz, 1H), 2.33 (s, 3H).

$^{13}\text{C}$  NMR (101 MHz,  $\text{CDCl}_3$ )  $\delta$  159.8, 147.5, 142.4, 139.7, 139.6, 138.8, 137.9, 136.9, 132.6, 131.9, 131.4, 131.1, 129.1, 128.3, 127.8, 127.2, 127.1, 127.0, 125.7, 125.5, 124.8, 124.6, 124.3, 122.0, 61.6, 21.4.

**N-((3,5-dichlorophenyl)(2-(pyridin-2-yl)phenyl)methyl)-4-methylbenzenesulfonamide(4m)<sup>4</sup>**

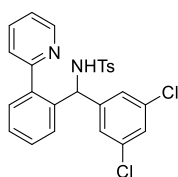

The title compound was prepared according to the general procedure as described. Silica gel flash column chromatography was performed using hexanes and ethyl acetate (5:1) resulting in 25.5 mg (53% yield).

$^1\text{H}$  NMR (600 MHz,  $\text{CDCl}_3$ )  $\delta$  8.90 (s, 1H), 8.58 (d,  $J = 4.8$  Hz, 1H), 7.59 (d,  $J = 7.8$  Hz, 2H), 7.54 (t,  $J = 8.4$  Hz, 1H), 7.32-7.28 (m, 1H), 7.25-7.23 (m, 1H), 7.17 (t,  $J = 6.6$  Hz, 1H), 7.10-7.05 (m, 3H), 6.98-6.92 (m, 2H), 6.90 (s, 1H), 6.81 (s, 2H), 5.59 (s, 1H), 2.34 (s, 3H).

$^{13}\text{C}$  NMR (151 MHz,  $\text{CDCl}_3$ )  $\delta$  159.4, 147.6, 144.5, 142.7, 139.3, 138.5, 138.5, 137.4, 134.0, 131.5, 131.2, 129.2, 128.5, 128.3, 126.9, 126.4, 124.8, 124.5, 122.4, 60.9, 21.4.

**N-((5-chloro-2-(pyridin-2-yl)phenyl)(4-(trifluoromethyl)phenyl)methyl)-4-methyl-benzenesulfonamide (4n)**

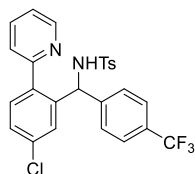

The title compound was prepared according to the general procedure as described. Silica gel flash column chromatography was performed using hexanes and ethyl acetate (5:1) resulting in 27.9 mg (54% yield).

$^1\text{H}$  NMR (600 MHz,  $\text{CDCl}_3$ )  $\delta$  8.94 (d,  $J = 9.6$  Hz, 1H), 8.52 (d,  $J = 4.8$  Hz, 1H), 7.61 (d,  $J = 8.4$  Hz, 2 H), 7.45 (td,  $J = 7.7$  Hz, 1.8 Hz, 1H), 7.23 (dd,  $J = 8.1$  Hz, 2.2 Hz, 1H), 7.18 (d,  $J = 8.4$  Hz, 2H), 7.06-7.15 (m, 6H), 6.84 (d,  $J = 7.8$  Hz, 1H), 6.81 (d,  $J = 2.4$  Hz, 1H), 5.58 (d,  $J = 9.6$  Hz, 1H), 2.37 (s, 3H).

$^{13}\text{C}$  NMR (151 MHz,  $\text{CDCl}_3$ )  $\delta$  158.5, 147.7, 144.2, 143.1, 140.6, 138.2, 137.7, 137.3, 134.4, 132.7, 131.3, 128.7 (q,  $J = 32.5$  Hz), 128.00, 127.2, 126.5, 126.3, 124.4 (q,  $J = 3.6$  Hz), 123.9 (q,  $J = 272.1$  Hz), 122.5, 61.0, 21.4.

$^{19}\text{F}$  NMR (565 MHz,  $\text{CDCl}_3$ )  $\delta$  -62.66.

**HRMS(ESI):**  $m/z$  Calcd. for  $\text{C}_{26}\text{H}_{20}\text{ClF}_3\text{N}_2\text{O}_2\text{S}$   $[\text{M}+\text{H}]^+$ :517.0959; Found:517.0958.

#### **N-((5-bromo-2-(pyridin-2-yl)phenyl)(4-(trifluoromethyl)phenyl)methyl)-4-methylbenzenesulfonamide (4o)**

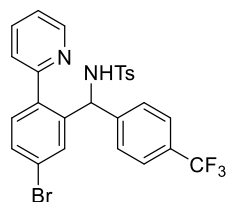

The title compound was prepared according to the general procedure as described. Silica gel flash column chromatography was performed using hexanes and ethyl acetate (5:1) resulting in 39.2 mg (70% yield).

$^1\text{H}$  NMR (600 MHz,  $\text{CDCl}_3$ )  $\delta$  8.96 (d,  $J = 9.6$  Hz, 1H), 8.52 (d,  $J = 4.8$  Hz, 1H), 7.62 (d,  $J = 8.4$  Hz, 2H), 7.45 (td,  $J = 7.8$ , 1.8 Hz, 1H), 7.38 (dd,  $J = 7.8$ , 1.8 Hz, 1H), 7.18 (d,  $J = 8.4$  Hz, 2H), 7.15-7.04 (m, 6H), 6.95 (d,  $J = 2.4$  Hz, 1H), 6.84 (d,  $J = 7.8$  Hz, 1H), 5.56 (d,  $J = 10.2$  Hz, 1H), 2.39 (s, 3H).

$^{13}\text{C}$  NMR (151 MHz,  $\text{CDCl}_3$ )  $\delta$  158.5, 147.7, 144.2, 143.1, 140.8, 138.2, 137.4, 134.2, 132.9, 131.0, 129.8, 129.4, 128.7 (q,  $J = 32.8$  Hz), 127.2, 126.9, 126.3, 124.4 (q,  $J = 3.9$  Hz), 123.9 (q,  $J = 272.1$  Hz), 122.7, 122.5, 61.0, 21.6.

$^{19}\text{F}$  NMR (565 MHz,  $\text{CDCl}_3$ )  $\delta$  -62.66.

**HRMS(ESI):**  $m/z$  Calcd. for  $\text{C}_{26}\text{H}_{20}\text{BrF}_3\text{N}_2\text{O}_2\text{S}$   $[\text{M}+\text{H}]^+$ :561.0454; Found:561.0451.

**4-methyl-N-((2-(pyridin-2-yl)-5-(trifluoromethyl)phenyl)(4-(trifluoromethyl)-phenyl)methyl)benzenesulfonamide (4p)**

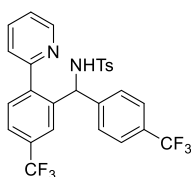

The title compound was prepared according to the general procedure as described. Silica gel flash column chromatography was performed using hexanes and ethyl acetate (5:1) resulting in 36.9 mg (67% yield).

$^1\text{H}$  NMR (600 MHz,  $\text{CDCl}_3$ )  $\delta$  8.84 (d,  $J = 9.6$  Hz, 1H), 8.57 (d,  $J = 5.4$  Hz, 1H), 7.61 (d,  $J = 7.8$  Hz, 2H), 7.52 (dd,  $J = 7.8$  Hz, 1.8 Hz, 1H), 7.48 (td,  $J = 7.8$  Hz, 1.8 Hz, 1H), 7.35 (d,  $J = 7.8$  Hz, 1H), 7.21-7.11 (m, 4H), 7.09-7.05 (m, 4H), 6.87 (d,  $J = 7.8$  Hz, 1H), 5.73 (d,  $J = 9.6$  Hz, 1H), 2.32 (s, 3H).

$^{13}\text{C}$  NMR (151 MHz,  $\text{CDCl}_3$ )  $\delta$  158.2, 147.9, 144.1, 143.2, 142.9, 139.9, 138.2, 137.5, 132.1, 130.4, 129.4, 129.0, 127.9 (d,  $J = 3.9$  Hz), 126.8, 126.2, 125.1 (q,  $J = 3.8$  Hz), 124.5, 124.4 (d,  $J = 3.8$  Hz), 123.9 (q,  $J = 272.2$  Hz), 122.9, 61.1, 21.3.

$^{19}\text{F}$  NMR (565 MHz,  $\text{CDCl}_3$ )  $\delta$  -62.68.

**HRMS(ESI):**  $m/z$  Calcd. for  $\text{C}_{27}\text{H}_{20}\text{F}_6\text{N}_2\text{O}_2\text{S}$   $[\text{M}+\text{Na}]^+$ :573.1042; Found:573.1038.

**4-methyl-N-((2-(pyridin-2-yl)-5-(trifluoromethoxy)phenyl)(4-(trifluoromethyl)-phenyl)methyl)benzenesulfonamide (4q)**

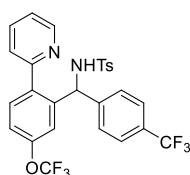

The title compound was prepared according to the general procedure as described. Silica gel flash column chromatography was performed using hexanes and ethyl acetate (5:1) resulting in 40.2 mg (71% yield).

$^1\text{H}$  NMR (600 MHz,  $\text{CDCl}_3$ )  $\delta$  8.88 (d,  $J = 9.6$  Hz, 1H), 8.54 (d,  $J = 4.8$  Hz, 1H), 7.63 (d,  $J = 7.8$  Hz, 2H), 7.47 (td,  $J = 7.8$  Hz, 1.8 Hz, 1H), 7.27-7.24 (m, 1H), 7.19 (d,  $J = 8.4$  Hz, 2H), 7.15-7.09 (m, 4H), 7.07 (d,  $J = 8.4$  Hz, 2H), 6.86 (d,  $J = 7.8$  Hz, 1H), 6.81 (s, 1H), 5.67 (d,  $J = 10.2$  Hz, 1H), 2.34 (s, 3H).

$^{13}\text{C}$  NMR (151 MHz,  $\text{CDCl}_3$ )  $\delta$  158.2, 148.8, 147.8, 144.1, 143.1, 141.2, 138.3, 137.9, 137.4, 133.0, 129.4, 126.8, 126.3, 124.8, 124.4 (q,  $J = 3.9$  Hz), 123.3, 123.9 (q,  $J = 272.1$  Hz), 122.6, 121.1, 119.6, 119.4, 60.9, 21.3.

$^{19}\text{F}$  NMR (565 MHz,  $\text{CDCl}_3$ )  $\delta$  -57.71, -62.68.

**HRMS(ESI):**  $m/z$  Calcd. for  $\text{C}_{27}\text{H}_{20}\text{F}_6\text{N}_2\text{O}_3\text{S}$   $[\text{M}+\text{H}]^+$ :567.1172; Found:567.1171.

**Methyl 3-(((4-methylphenyl)sulfonamido)(4-(trifluoromethyl)phenyl)methyl)-4-(pyridin-2-yl)benzoate (4r)**

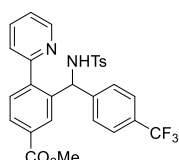

The title compound was prepared according to the general procedure as described. Silica gel flash column chromatography was performed using hexanes and ethyl acetate (5:1) resulting in 32.4 mg (60% yield).

$^1\text{H}$  NMR (600 MHz,  $\text{CDCl}_3$ )  $\delta$  8.89 (d,  $J$  = 9.6 Hz, 1H), 8.53 (d,  $J$  = 3.0 Hz, 1H), 7.91 (d,  $J$  = 1.8 Hz, 1H), 7.75 (dd,  $J$  = 7.8 Hz, 1.8 Hz, 1H), 7.60 (d,  $J$  = 8.4 Hz, 2H), 7.49 (td,  $J$  = 7.8 Hz, 1.8 Hz, 1H), 7.18 (d,  $J$  = 8.4 Hz, 2H), 7.16-7.12 (m, 1H), 7.04-7.10 (m, 5H), 6.94 (d,  $J$  = 7.8 Hz, 1H), 5.79 (d,  $J$  = 9.6 Hz, 1H), 3.92 (s, 3H), 2.33 (s, 3H).

$^{13}\text{C}$  NMR (151 MHz,  $\text{CDCl}_3$ )  $\delta$  166.1, 158.6, 147.7, 144.3, 143.7, 142.9, 139.5, 138.5, 137.4, 132.6, 131.4, 129.4, 129.3, 128.7 (q,  $J$  = 32.8 Hz), 126.9, 126.3, 124.6, 124.4 (q,  $J$  = 3.7 Hz), 123.9 (q,  $J$  = 272.6 Hz), 122.6, 60.9, 52.3, 26.9, 21.3.

$^{19}\text{F}$  NMR (565 MHz,  $\text{CDCl}_3$ )  $\delta$  -62.67.

**HRMS(ESI):**  $m/z$  Calcd. for  $\text{C}_{28}\text{H}_{23}\text{F}_3\text{N}_2\text{O}_4\text{S}$   $[\text{M}+\text{H}]^+$ : 541.1403; Found:541.1402.

**4-methyl-N-((5-methyl-2-(pyridin-2-yl)phenyl)(4-(trifluoromethyl)phenyl)-methyl)benzenesulfonamide (4s)**

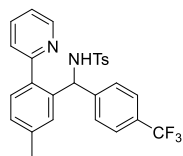

The title compound was prepared according to the general procedure as described. Silica gel flash column chromatography was performed using hexanes and ethyl acetate (5:1) resulting in 43.6 mg (88% yield).

$^1\text{H}$  NMR (600 MHz,  $\text{CDCl}_3$ )  $\delta$  9.09 (d,  $J$  = 10.2 Hz, 1H), 8.49 (d,  $J$  = 3 Hz, 1H), 7.60 (d,  $J$  = 8.4 Hz, 2H), 7.43 (td,  $J$  = 7.8 Hz, 1.8 Hz, 1H), 7.16 (d,  $J$  = 7.8 Hz, 2H), 7.11 (d,  $J$  = 7.8 Hz, 3H), 7.08-7.04 (m, 4H), 6.87 (d,  $J$  = 7.8 Hz, 1H), 6.68 (s, 1H), 5.60 (d,  $J$  = 9.6 Hz, 1H), 2.34 (s, 3H), 2.17 (s, 3H).



$^{13}\text{C}$  NMR (151 MHz,  $\text{CDCl}_3$ )  $\delta$  159.7, 147.5, 145.1, 142.3, 138.7, 138.2, 137.1, 136.5, 132.4, 131.5, 129.0, 128.6, 128.1 (q,  $J = 32.0$  Hz), 127.0, 126.3, 124.9, 124.4, 124.2 (q,  $J = 3.8$  Hz), 124.0 (q,  $J = 272.0$  Hz), 121.9, 61.5, 21.3, 20.6.

$^{19}\text{F}$  NMR (565 MHz,  $\text{CDCl}_3$ )  $\delta$  -62.59.

**HRMS(ESI):**  $m/z$  Calcd. for  $\text{C}_{27}\text{H}_{23}\text{F}_3\text{N}_2\text{O}_2\text{S}$   $[\text{M}+\text{H}]^+$ : 497.1505; Found:497.1504.

**N-((5-methoxy-2-(pyridin-2-yl)phenyl)(4-(trifluoromethyl)phenyl)methyl)-4-methylbenzenesulfonamide (4t)**

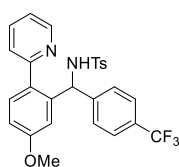

The title compound was prepared according to the general procedure as described. Silica gel flash column chromatography was performed using hexanes and ethyl acetate (5:1) resulting in 43 mg (84% yield).

$^1\text{H}$  NMR (600 MHz,  $\text{CDCl}_3$ )  $\delta$  9.21 (d,  $J = 10.2$  Hz, 1H), 8.48 (d,  $J = 4.8$  Hz, 1H), 7.62 (d,  $J = 8.4$  Hz, 2H), 7.43 (td,  $J = 7.8$  Hz, 1.8 Hz, 1H), 7.19-7.11 (m, 5H), 7.09-7.02 (m, 3H), 6.87 (d,  $J = 7.8$  Hz, 1H), 6.78 (dd,  $J = 8.4$  Hz, 2.4 Hz, 1H), 6.47 (d,  $J = 2.4$  Hz, 1H), 5.61 (d,  $J = 9.6$  Hz, 1H), 3.71 (s, 3H), 2.33 (s, 3H).

$^{13}\text{C}$  NMR (151 MHz,  $\text{CDCl}_3$ )  $\delta$  159.4, 159.3, 147.4, 144.9, 142.5, 140.4, 138.8, 137.1, 132.9, 131.7, 129.1, 128.5 (q,  $J = 32.5$  Hz), 127.0, 126.3, 124.3, 124.2 (q,  $J = 3.9$  Hz), 124.0 (q,  $J = 272.1$  Hz), 121.7, 117.2, 113.1, 61.6, 55.1, 21.3.

$^{19}\text{F}$  NMR (565 MHz,  $\text{CDCl}_3$ )  $\delta$  -62.99.

**HRMS(ESI):**  $m/z$  Calcd. for  $\text{C}_{27}\text{H}_{23}\text{F}_3\text{N}_2\text{O}_3\text{S}$   $[\text{M}+\text{H}]^+$ : 513.1454; Found:513.1454.

**4-methyl-N-((4-(pyridin-2-yl)-[1,1'-biphenyl]-3-yl)(4-(trifluoromethyl)phenyl)-methyl)-benzenesulfonamide (4u)**

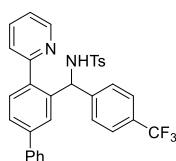

The title compound was prepared according to the general procedure as described. Silica gel flash column chromatography was performed using hexanes and ethyl acetate (5:1) resulting in 34.6 mg (62% yield).

$^1\text{H}$  NMR (600 MHz,  $\text{CDCl}_3$ )  $\delta$  9.18 (d,  $J = 9.6$  Hz, 1H), 8.54 (dd,  $J = 4.8$  Hz, 1.8 Hz, 1H), 7.63 (d,  $J = 8.4$  Hz, 2H), 7.52 (dd,  $J = 8.4$  Hz, 2.4 Hz, 1H), 7.50-7.37 (m, 6H),

7.31 (d,  $J = 7.8$  Hz, 1H), 7.21-7.14 (m, 4H), 7.14-7.08 (m, 2H), 6.95 (dd,  $J = 17.4$  Hz, 7.8 Hz, 3H), 5.73 (d,  $J = 10.2$  Hz, 1H), 2.12 (s, 3H).

$^{13}\text{C}$  NMR (151 MHz,  $\text{CDCl}_3$ )  $\delta$  159.3, 147.6, 144.9, 142.7, 140.9, 139.4, 139.2, 138.5, 138.2, 137.3, 132.2, 130.1, 129.2, 128.7 (q,  $J = 35.3$  Hz), 128.5, 127.9, 126.9, 126.9, 126.4, 126.3, 124.4, 124.3 (q,  $J = 3.6$  Hz), 124.0 (q,  $J = 272.1$  Hz), 122.3, 61.7, 21.3.

$^{19}\text{F}$  NMR (565 MHz,  $\text{CDCl}_3$ )  $\delta$  -62.58.

**HRMS(ESI):**  $m/z$  Calcd. for  $\text{C}_{32}\text{H}_{25}\text{F}_3\text{N}_2\text{O}_2\text{S}$   $[\text{M}+\text{H}]^+$ : 559.1662; Found: 559.1659

**4-methyl-N-((4-methyl-2-(pyridin-2-yl)phenyl)(4-(trifluoromethyl)phenyl)-methyl)-benzenesulfonamide (4v)**

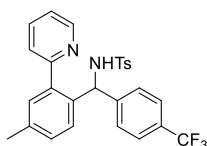

The title compound was prepared according to the general procedure as described. Silica gel flash column chromatography was performed using hexanes and ethyl acetate (5:1) resulting in 25.3 mg (51% yield).

$^1\text{H}$  NMR (600 MHz,  $\text{CDCl}_3$ )  $\delta$  8.83 (d,  $J = 9.0$  Hz, 1H), 8.50 (d,  $J = 3.6$  Hz, 1H), 7.61 (d,  $J = 8.4$  Hz, 2H), 7.44 (td,  $J = 7.2$  Hz, 1.8 Hz, 1H), 7.16 (d,  $J = 7.8$  Hz, 2H), 7.10-7.02 (m, 6H), 6.92-6.86 (m, 3H), 5.67 (d,  $J = 9.6$  Hz, 1H), 2.35 (s, 3H), 2.32 (s, 3H).

$^{13}\text{C}$  NMR (151 MHz,  $\text{CDCl}_3$ )  $\delta$  159.7, 147.5, 145.3, 142.5, 139.2, 138.8, 138.0, 137.0, 136.4, 132.2, 131.2, 129.1, 128.9, 128.6 (q,  $J = 32.2$  Hz), 126.9, 126.4, 124.4, 124.2 (q,  $J = 3.6$  Hz), 124.0 (q,  $J = 271.6$  Hz), 122.1, 61.0, 21.4, 20.9.

$^{19}\text{F}$  NMR (565 MHz,  $\text{CDCl}_3$ )  $\delta$  -62.59.

**HRMS(ESI):**  $m/z$  Calcd. for  $\text{C}_{27}\text{H}_{23}\text{F}_3\text{N}_2\text{O}_2\text{S}$   $[\text{M}+\text{H}]^+$ : 497.1505; Found: 497.1503

**4-methyl-N-((2-(5-methylpyridin-2-yl)phenyl)(4-(trifluoromethyl)phenyl)-methyl)-benzenesulfonamide (4w)**

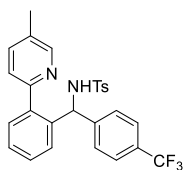

The title compound was prepared according to the general procedure as described. Silica gel flash column chromatography was performed using hexanes and ethyl acetate (5:1) resulting in 26.8 mg (54% yield).

$^1\text{H NMR}$  (600 MHz,  $\text{CDCl}_3$ )  $\delta$  9.09 (d,  $J = 9.6$  Hz, 1H), 8.49 (d,  $J = 4.8$  Hz, 1H), 7.60 (d,  $J = 8.4$  Hz, 2H), 7.43 (td,  $J = 7.8$  Hz, 1.8 Hz, 1H), 7.16 (d,  $J = 8.4$  Hz, 2H), 7.11 (d,  $J = 7.7$  Hz, 3H), 7.08-7.04 (m, 4H), 6.87 (d,  $J = 7.8$  Hz, 1H), 6.67 (d,  $J = 1.8$  Hz, 1H), 5.60 (d,  $J = 9.6$  Hz, 1H), 2.34 (s, 3H), 2.17 (s, 3H).

$^{13}\text{C NMR}$  (151 MHz,  $\text{CDCl}_3$ )  $\delta$  159.7, 147.5, 145.1, 142.3, 138.8, 138.2, 137.1, 136.5, 132.3, 131.5, 129.0, 128.8 (q,  $J = 32.0$  Hz), 128.6, 128.4, 127.0, 126.3, 124.4, 124.2 (q,  $J = 3.8$  Hz), 124.0 (q,  $J = 272.6$  Hz), 121.9, 61.5, 21.3, 20.6.

$^{19}\text{F NMR}$  (565 MHz,  $\text{CDCl}_3$ )  $\delta$  -62.59.

**HRMS(ESI):**  $m/z$  Calcd. for  $\text{C}_{27}\text{H}_{23}\text{F}_3\text{N}_2\text{O}_2\text{S}$   $[\text{M}+\text{H}]^+$ : 497.1505; Found: 497.1503

#### 4-methyl-N-((2-(pyrimidin-2-yl)phenyl)(4-(trifluoromethyl)phenyl)methyl)-benzenesulfonamide (4x)

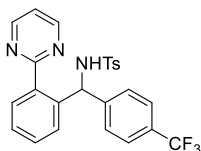

The title compound was prepared according to the general procedure as described. Silica gel flash column chromatography was performed using hexanes and ethyl acetate (3:1) resulting in 29.0 mg (60% yield).

$^1\text{H NMR}$  (600 MHz,  $\text{CDCl}_3$ )  $\delta$  8.60 (d,  $J = 4.8$  Hz, 2H), 8.26 (d,  $J = 10.2$  Hz, 1H), 7.81 (d,  $J = 7.8$  Hz, 1H), 7.58 (d,  $J = 8.4$  Hz, 2H), 7.37 (td,  $J = 7.2$  Hz, 1.2 Hz, 1H), 7.25-7.23 (m, 2H), 7.22-7.17 (m, 3H), 7.07 (d,  $J = 7.8$  Hz, 2H), 7.05-6.99 (m, 2H), 5.91 (d,  $J = 10.2$  Hz, 1H), 2.35 (s, 3H).

$^{13}\text{C NMR}$  (151 MHz,  $\text{CDCl}_3$ )  $\delta$  166.3, 156.6, 145.0, 142.8, 138.8, 138.5, 137.3, 132.6, 131.6, 129.8, 129.2, 129.0 (q,  $J = 32.8$  Hz), 128.4, 126.9, 126.7, 124.6 (q,  $J = 3.8$  Hz), 124.0 (q,  $J = 271.8$  Hz), 118.7, 61.0, 21.4.

$^{19}\text{F NMR}$  (565 MHz,  $\text{CDCl}_3$ )  $\delta$  -62.65.

**HRMS(ESI):**  $m/z$  Calcd. for  $\text{C}_{25}\text{H}_{20}\text{F}_3\text{N}_3\text{O}_2\text{S}$   $[\text{M}+\text{H}]^+$ : 484.1301; Found: 484.1301

**N-((2-(isoquinolin-1-yl)phenyl)(4-(trifluoromethyl)phenyl)methyl)-4-methylbenzenesulfonamide (4y)**

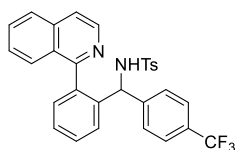

The title compound was prepared according to the general procedure as described. Silica gel flash column chromatography was performed using hexanes and ethyl acetate (5:1) resulting in 29.0 mg (52% yield).

$^1\text{H}$  NMR (600 MHz,  $\text{CDCl}_3$ )  $\delta$  8.52 (d,  $J = 6.0$  Hz, 1H), 8.30 (d,  $J = 9.6$  Hz, 1H), 7.68 (d,  $J = 7.8$  Hz, 2H), 7.62 (d,  $J = 8.4$  Hz, 1H), 7.54 (d,  $J = 6.0$  Hz, 1H), 7.51-7.47 (m, 1H), 7.32 (td,  $J = 7.8$  Hz, 1.2 Hz, 1H), 7.23-7.18 (m, 2H), 7.17-7.11 (m, 4H), 7.03 (d,  $J = 7.8$  Hz, 1H), 6.82 (d,  $J = 8.4$  Hz, 2H), 6.74 (d,  $J = 7.8$  Hz, 2H), 5.60 (d,  $J = 9.6$  Hz, 1H), 2.38 (s, 3H).

$^{13}\text{C}$  NMR (151 MHz,  $\text{CDCl}_3$ )  $\delta$  160.5, 144.1, 142.8, 140.9, 140.2, 138.6, 137.6, 136.3, 132.1, 130.8, 130.4, 129.7, 129.3, 128.3, 127.2, 127.0, 126.9, 126.8, 126.5, 125.5, 124.5, 123.7 (q,  $J = 3.9$  Hz), 123.6 (q,  $J = 272.7$  Hz) 121.0, 61.3, 21.4.

$^{19}\text{F}$  NMR (565 MHz,  $\text{CDCl}_3$ )  $\delta$  -62.78.

**HRMS(ESI):**  $m/z$  Calcd. for  $\text{C}_{30}\text{H}_{23}\text{F}_3\text{N}_2\text{O}_2\text{S}$   $[\text{M}+\text{H}]^+$ : 533.1505; Found: 533.1505

**2-methyl-N-(phenyl(2-(pyridin-2-yl)phenyl)methyl)benzenesulfonamide (4z)**

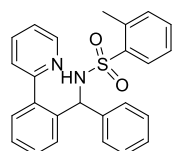

The title compound was prepared according to the general procedure as described. Silica gel flash column chromatography was performed using hexanes and ethyl acetate (5:1) resulting in 29.4 mg (71% yield).

$^1\text{H}$  NMR (600 MHz,  $\text{CDCl}_3$ )  $\delta$  9.05 (d,  $J = 9.6$  Hz, 1H), 8.51 (d,  $J = 4.2$  Hz, 1H), 8.04 (d,  $J = 7.8$  Hz, 1H), 7.43 (td,  $J = 7.8$  Hz, 1.8 Hz, 1H), 7.34 (td,  $J = 7.2$  Hz, 1.2 Hz, 1H), 7.28-7.21 (m, 3H), 7.08-7.04 (m, 1H), 7.02-6.93 (m, 4H), 6.93-6.85 (m, 4H), 6.70 (d,  $J = 7.8$  Hz, 1H), 5.58 (d,  $J = 9.6$  Hz, 1H), 2.38 (s, 3H).

$^{13}\text{C}$  NMR (151 MHz,  $\text{CDCl}_3$ )  $\delta$  159.9, 147.4, 140.8, 139.6, 137.3, 136.9, 132.1, 132.0, 131.3, 130.9, 129.4, 128.1, 127.8, 127.3, 126.1, 125.9, 125.7, 124.4, 121.9, 61.5, 19.7.

**HRMS(ESI):**  $m/z$  Calcd. for  $\text{C}_{25}\text{H}_{22}\text{N}_2\text{O}_2\text{S}$   $[\text{M}+\text{H}]^+$ : 415.1475; Found: 415.1474

**N-((2-(pyridin-2-yl)phenyl)(4-(trifluoromethyl)phenyl)methyl)benzenesulfonamide (4aa)**

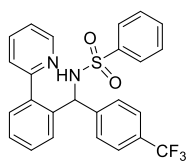

The title compound was prepared according to the general procedure as described. Silica gel flash column chromatography was performed using hexanes and ethyl acetate (10:1) resulting in 30.4 mg (65% yield).

$^1\text{H}$  NMR (600 MHz,  $\text{CDCl}_3$ )  $\delta$  9.05 (d,  $J = 9.6$  Hz, 1H), 8.52 (d,  $J = 5.4$  Hz, 1H), 7.74 (d,  $J = 7.2$  Hz, 2H), 7.45 (td,  $J = 7.7$  Hz, 1.8 Hz, 1H), 7.40 (t,  $J = 7.5$  Hz, 1H), 7.29-7.26 (m, 3H), 7.23 (d,  $J = 7.2$  Hz, 1H), 7.17 (d,  $J = 8.4$  Hz, 2H), 7.12-7.05 (m, 4H), 6.99 (d,  $J = 7.2$  Hz, 1H), 6.88 (d,  $J = 7.8$  Hz, 1H), 5.73 (d,  $J = 9.6$  Hz, 1H).

$^{13}\text{C}$  NMR (151 MHz,  $\text{CDCl}_3$ )  $\delta$  159.6, 147.5, 145.0, 141.5, 139.3, 138.9, 137.3, 131.9, 131.6, 131.2, 129.1, 128.5 (q,  $J = 33.8$  Hz), 128.5, 128.3, 126.8, 126.3, 124.5, 124.3 (q,  $J = 3.6$  Hz), 124.0 (q,  $J = 271.9$  Hz), 122.2, 61.5.

$^{19}\text{F}$  NMR (565 MHz,  $\text{CDCl}_3$ )  $\delta$  -62.61.

**HRMS(ESI):**  $m/z$  Calcd. for  $\text{C}_{25}\text{H}_{19}\text{F}_3\text{N}_2\text{O}_2\text{S}$   $[\text{M}+\text{H}]^+$ : 469.1192; Found: 469.1195

**4-methoxy-N-((2-(pyridin-2-yl)phenyl)(4-(trifluoromethyl)phenyl)methyl)benzenesulfonamide (4ab)**

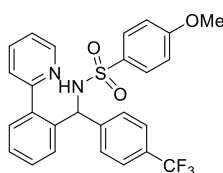

The title compound was prepared according to the general procedure as described. Silica gel flash column chromatography was performed using hexanes and ethyl acetate (5:1) resulting in 33.4 mg (67% yield).

$^1\text{H}$  NMR (600 MHz,  $\text{CDCl}_3$ )  $\delta$  8.84 (d,  $J = 9.6$  Hz, 1H), 8.52 (d,  $J = 3.6$  Hz, 1H), 7.66 (d,  $J = 9.0$  Hz, 2H), 7.45 (td,  $J = 7.8$  Hz, 1.8 Hz, 1H), 7.31-7.22 (m, 2H), 7.18 (d,  $J = 8.4$  Hz, 2H), 7.15-7.07 (m, 4H), 7.01 (d,  $J = 8.4$  Hz, 1H), 6.88 (d,  $J = 8.4$  Hz, 1H), 6.75 (d,  $J = 9.0$  Hz, 2H), 5.70 (d,  $J = 9.6$  Hz, 1H), 3.81 (s, 3H).

$^{13}\text{C}$  NMR (151 MHz,  $\text{CDCl}_3$ )  $\delta$  162.4, 159.6, 147.6, 145.1, 139.4, 139.3, 137.1, 133.5, 131.5, 131.2, 129.0, 128.7 (q,  $J = 32.8$  Hz), 128.4, 128.2, 126.4, 124.5, 124.3 (q,  $J = 3.7$  Hz), 123.8 (q,  $J = 272.9$  Hz), 122.2, 113.8, 61.3, 55.5.

$^{19}\text{F}$  NMR (565 MHz,  $\text{CDCl}_3$ )  $\delta$  -62.66.

**HRMS(ESI):**  $m/z$  Calcd. for  $\text{C}_{26}\text{H}_{21}\text{F}_3\text{N}_2\text{O}_3\text{S}$   $[\text{M}+\text{K}]^+$ : 537.0857; Found: 537.0853

**N-((2-(pyridin-2-yl)phenyl)(4-(trifluoromethyl)phenyl)methyl)-4-(trifluoromethyl)-benzenesulfonamide (4ac)**

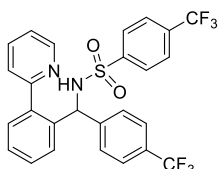

The title compound was prepared according to the general procedure as described. Silica gel flash column chromatography was performed using hexanes and ethyl acetate (5:1) resulting in 43.4 mg (81% yield).

$^1\text{H}$  NMR (600 MHz,  $\text{CDCl}_3$ )  $\delta$  9.40 (d,  $J = 9.6$  Hz, 1H), 8.52 (d,  $J = 3.6$  Hz, 1H), 7.75 (d,  $J = 8.4$  Hz, 2H), 7.48 (td,  $J = 7.8$  Hz, 1.8 Hz, 1H), 7.30-7.22 (m, 3H), 7.19 (d,  $J = 7.8$  Hz, 2H), 7.13-7.04 (m, 6H), 6.96 (d,  $J = 7.8$  Hz, 1H), 6.91 (d,  $J = 7.8$  Hz, 1H), 5.71 (d,  $J = 9.5$  Hz, 1H).

$^{13}\text{C}$  NMR (151 MHz,  $\text{CDCl}_3$ )  $\delta$  159.5, 151.5, 147.5, 144.5, 140.2, 139.1, 138.6, 137.4, 131.8, 131.3, 129.2, 128.9, 128.7 (q,  $J = 31.6$  Hz), 128.5, 128.1, 126.2, 124.7, 124.3 (q,  $J = 3.8$  Hz), 123.9 (q,  $J = 272.0$  Hz), 122.3, 120.7, 61.8.

$^{19}\text{F}$  NMR (565 MHz,  $\text{CDCl}_3$ )  $\delta$  -62.67, -63.19.

**HRMS(ESI):**  $m/z$  Calcd. for  $\text{C}_{26}\text{H}_{18}\text{F}_6\text{N}_2\text{O}_2\text{S}$   $[\text{M}+\text{H}]^+$ : 537.1066; Found: 537.1064

**N-((2-(pyridin-2-yl)phenyl)(4-(trifluoromethyl)phenyl)methyl)methanesulfonamide (4ad)**

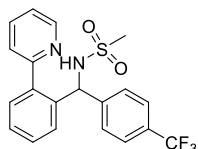

The title compound was prepared according to the general procedure as described. Silica gel flash column chromatography was performed using hexanes and ethyl acetate (10:1) resulting in 29.2 mg (72% yield).

$^1\text{H}$  NMR (600 MHz,  $\text{CDCl}_3$ )  $\delta$  8.55 (d,  $J = 9.6$  Hz, 1H), 8.47 (d,  $J = 4.2$  Hz, 1H), 7.64 (d,  $J = 7.3$  Hz, 1H), 7.54-7.47 (m, 3H), 7.42 (d,  $J = 7.3$  Hz, 1H), 7.23-7.20 (d,  $J = 7.8$

Hz, 2H), 7.15-7.09 (m, 3H), 6.98 (d,  $J = 7.8$  Hz, 1H), 5.91 (d,  $J = 9.6$  Hz, 1H), 2.81 (s, 3H).

$^{13}\text{C}$  NMR (151 MHz,  $\text{CDCl}_3$ )  $\delta$  159.4, 147.6, 145.0, 139.9, 139.9, 137.3, 132.2, 131.4, 129.2, 128.9, 128.6 (q,  $J = 32.3$  Hz), 126.3, 124.6, 124.4 (q,  $J = 3.8$  Hz), 124.0 (q,  $J = 272.3$  Hz), 122.3, 61.5, 42.1.

$^{19}\text{F}$  NMR (565 MHz,  $\text{CDCl}_3$ )  $\delta$  -62.63.

**HRMS(ESI):**  $m/z$  Calcd. for  $\text{C}_{20}\text{H}_{17}\text{F}_3\text{N}_2\text{O}_2\text{S}$   $[\text{M}+\text{H}]^+$ : 407.1036; Found: 407.1033

## 5. References

1. B. Zhou, Y. Hu and C. Wang, *Angew Chem., Int. Ed.*, 2015, **54**, 13659-13663.
2. C. Liu and W. Yang, *Chem. Commun.*, 2009, **41**, 6267-6269.
3. Y. Li, B. J. Li, W. H. Wang, W. P. Huang, X. S. Zhang, K. Chen and Z. J. Shi, *Angew Chem., Int. Ed.*, 2011, **50**, 2115-2119.
4. Z. Q. Liu, J. Tao, X. Zhuang, C. M. Hong, Z. Luo, Y. F. Wu, Q. H. Li and T. L. Liu, *Adv. Synth. Catal.*, 2021, **363**, 5279-5283.
5. X. S. Zhang, Y. Li, H. Li, K. Chen, Z. Q. Lei and Z. J. Shi, *Chem. Eur. J.*, 2012, **18**, 16214-16225.

## 6. NMR spectra

$^1\text{H}$  NMR (600 MHz,  $\text{CDCl}_3$ ) for **4a**

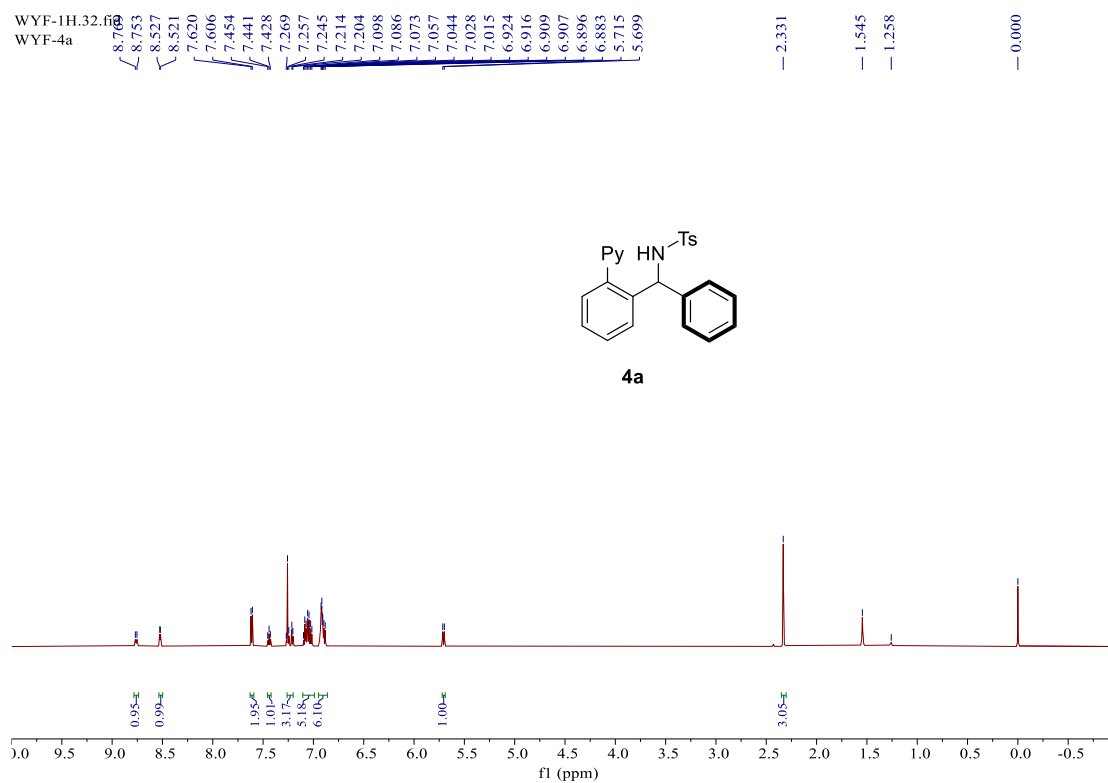

$^{13}\text{C}$  NMR (151 MHz,  $\text{CDCl}_3$ ) for **4a**

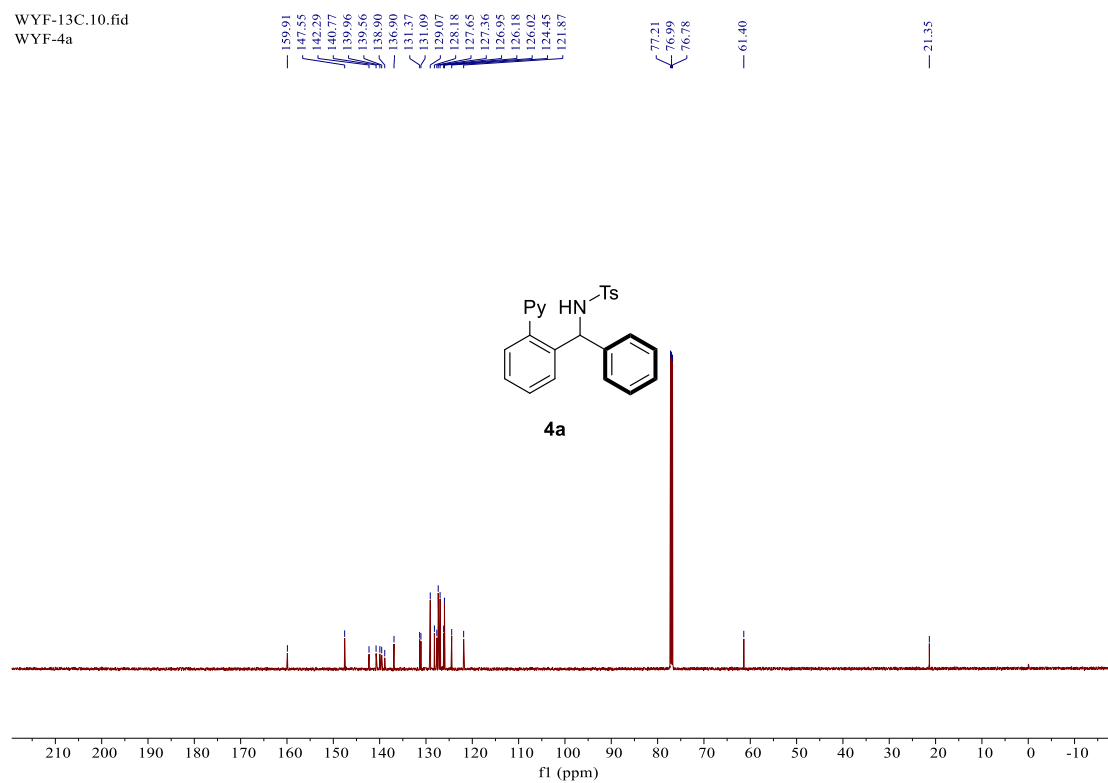



<sup>1</sup>H NMR (600 MHz, CDCl<sub>3</sub>) for **4b**

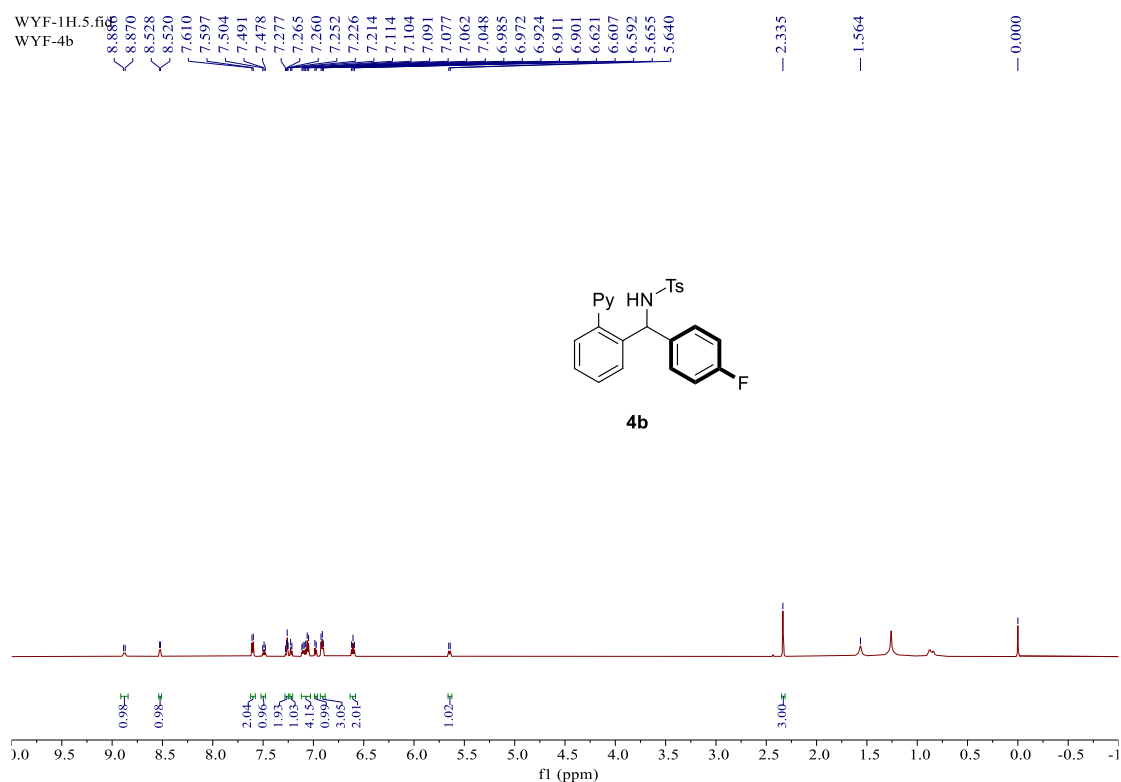

<sup>13</sup>C NMR (151 MHz, CDCl<sub>3</sub>) for **4b**

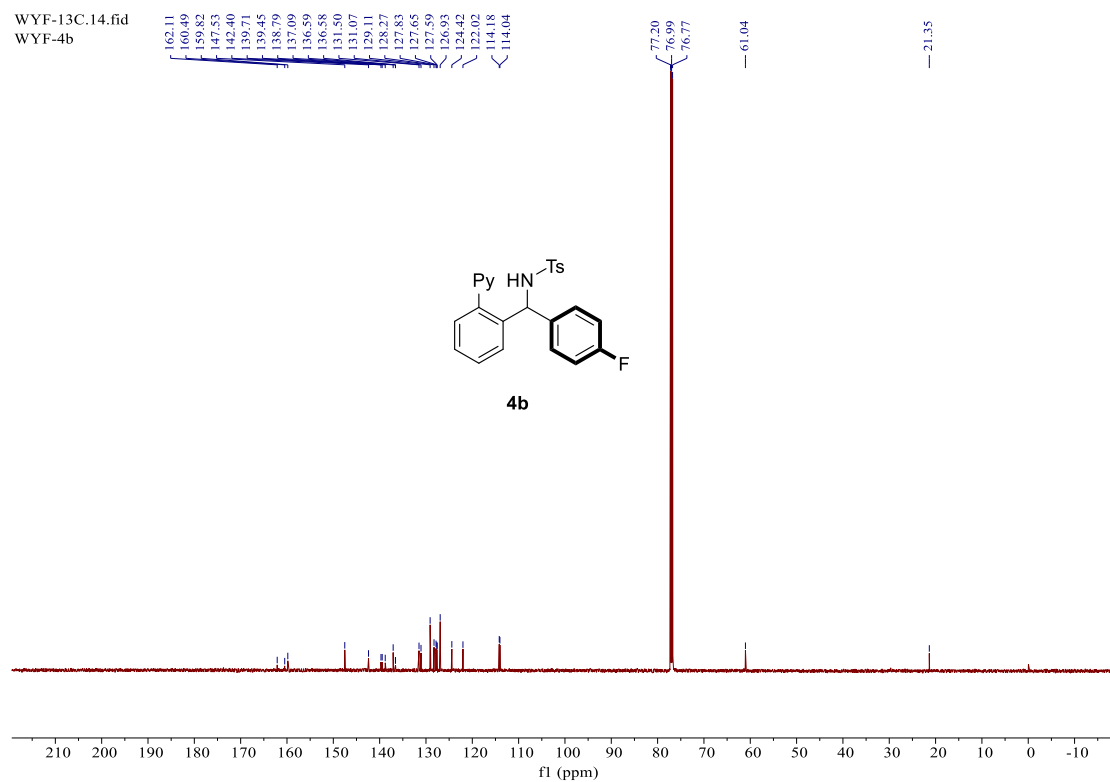

$^{19}\text{F}$  NMR (565 MHz,  $\text{CDCl}_3$ ) for **4b**

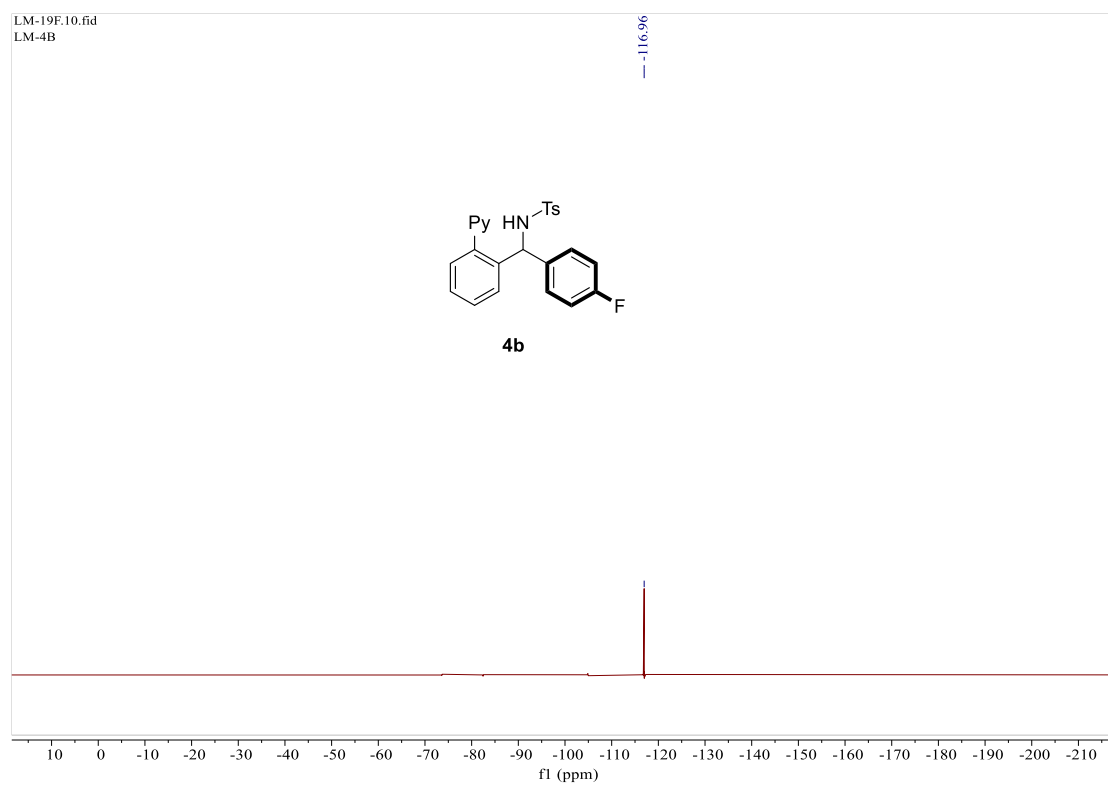

<sup>1</sup>H NMR (600 MHz, CDCl<sub>3</sub>) for **4c**

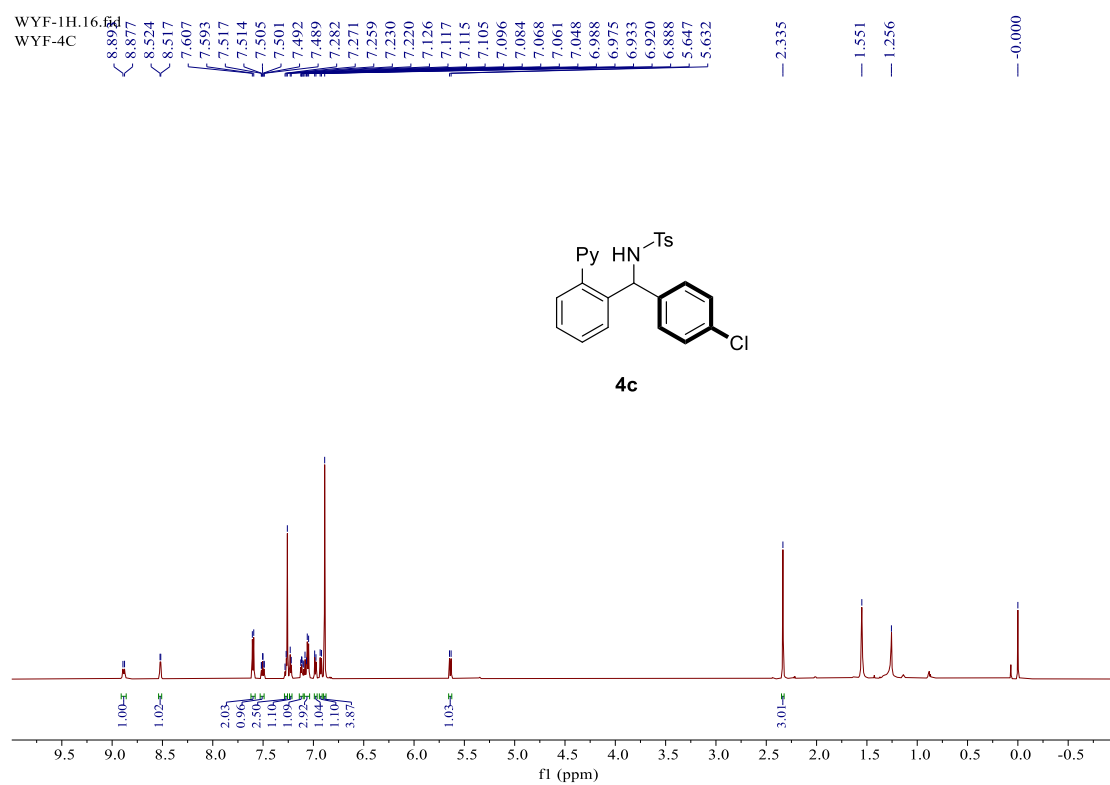

<sup>13</sup>C NMR (151 MHz, CDCl<sub>3</sub>) for **4c**

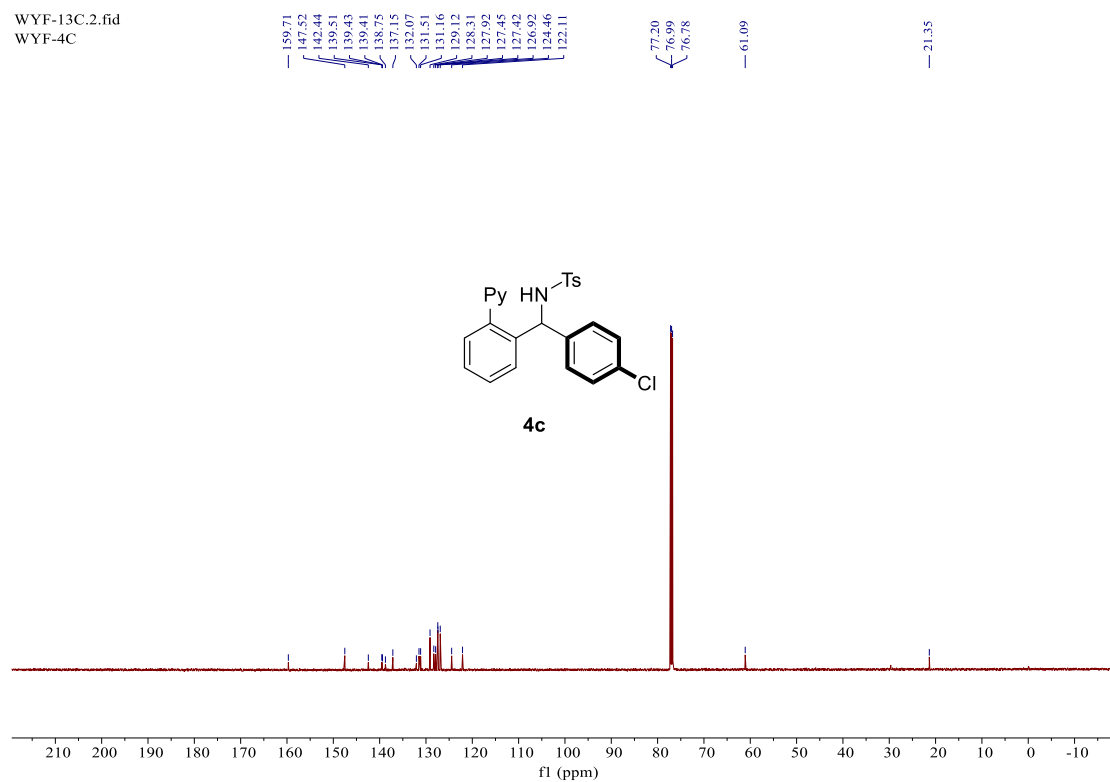

<sup>1</sup>H NMR (600 MHz, CDCl<sub>3</sub>) for **4d**

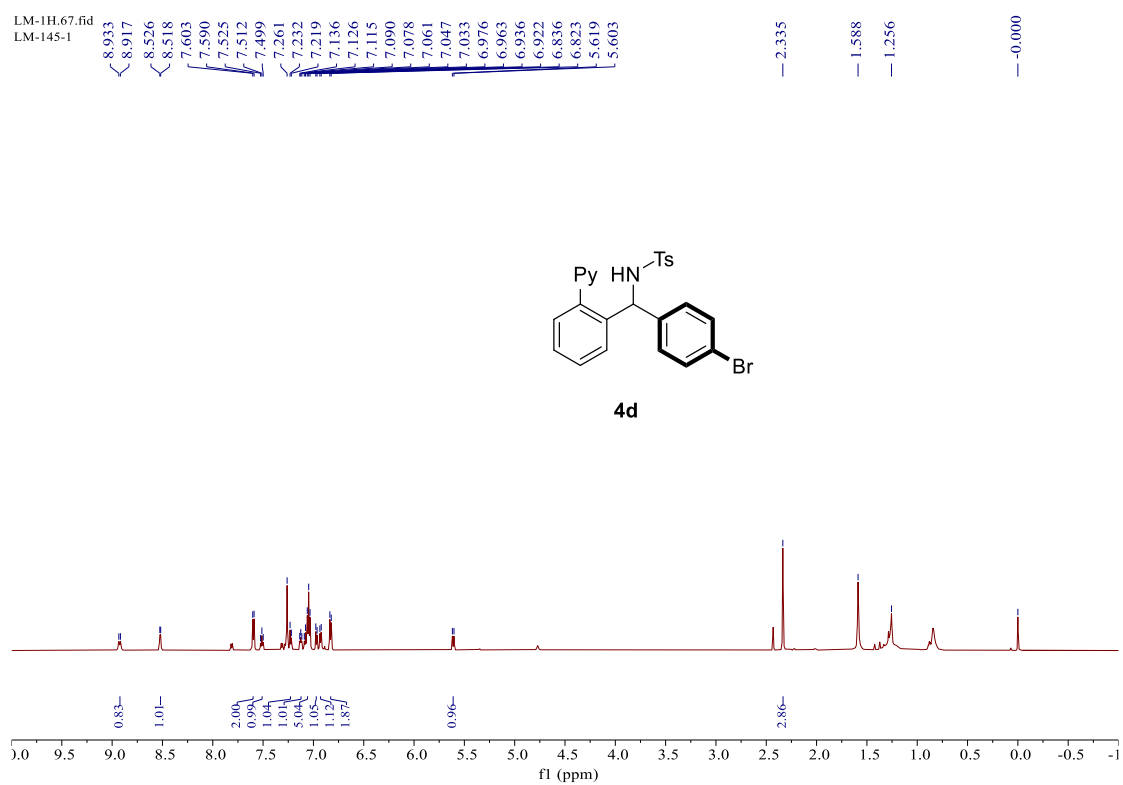

<sup>13</sup>C NMR (151 MHz, CDCl<sub>3</sub>) for **4d**

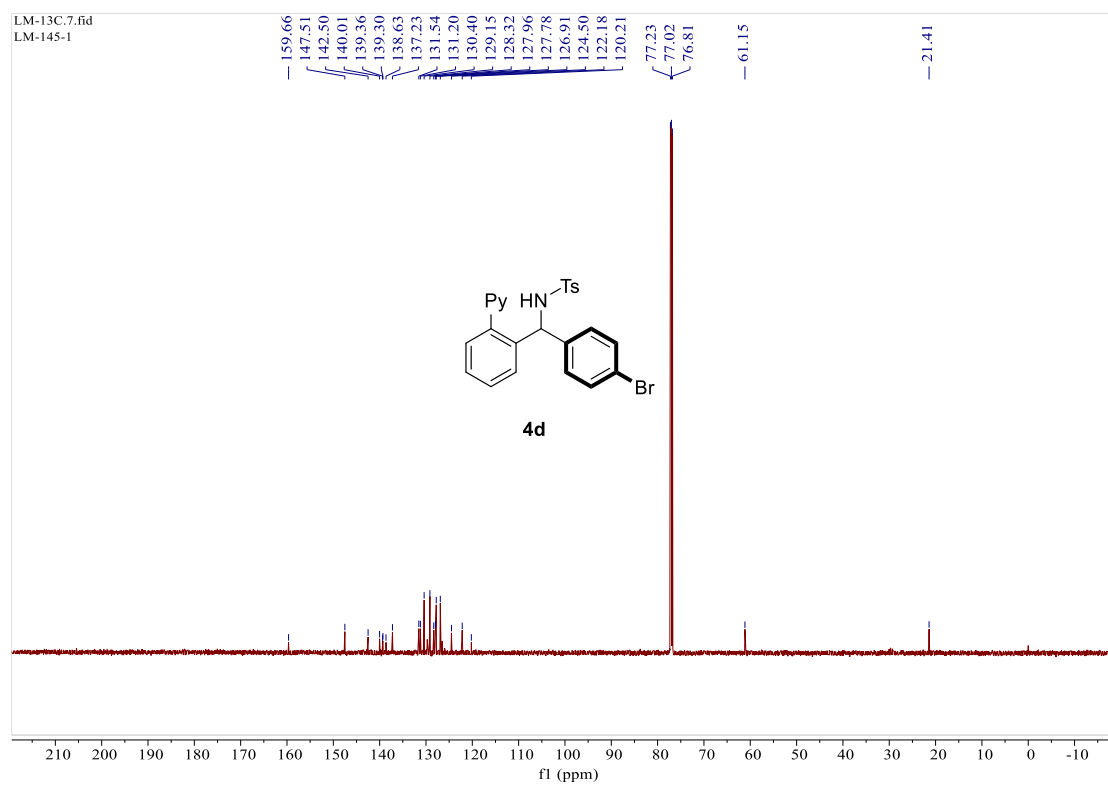

<sup>1</sup>H NMR (600 MHz, CDCl<sub>3</sub>) for **4e**

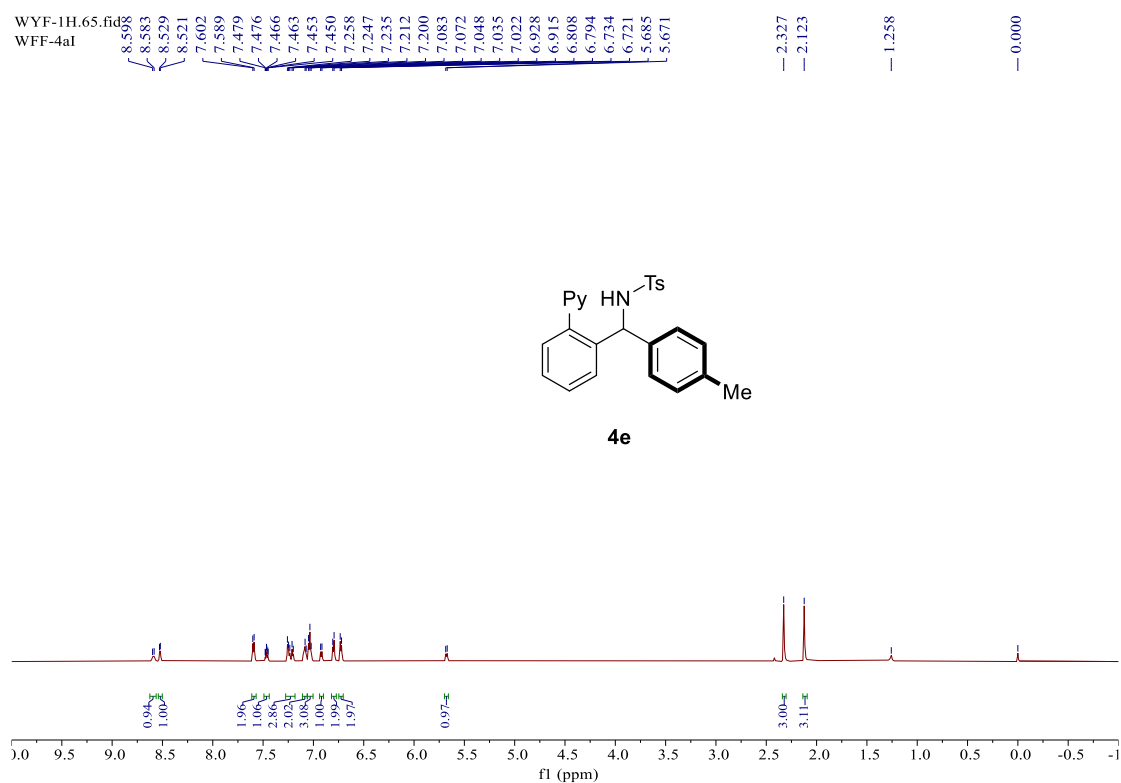

<sup>13</sup>C NMR (151 MHz, CDCl<sub>3</sub>) for **4e**

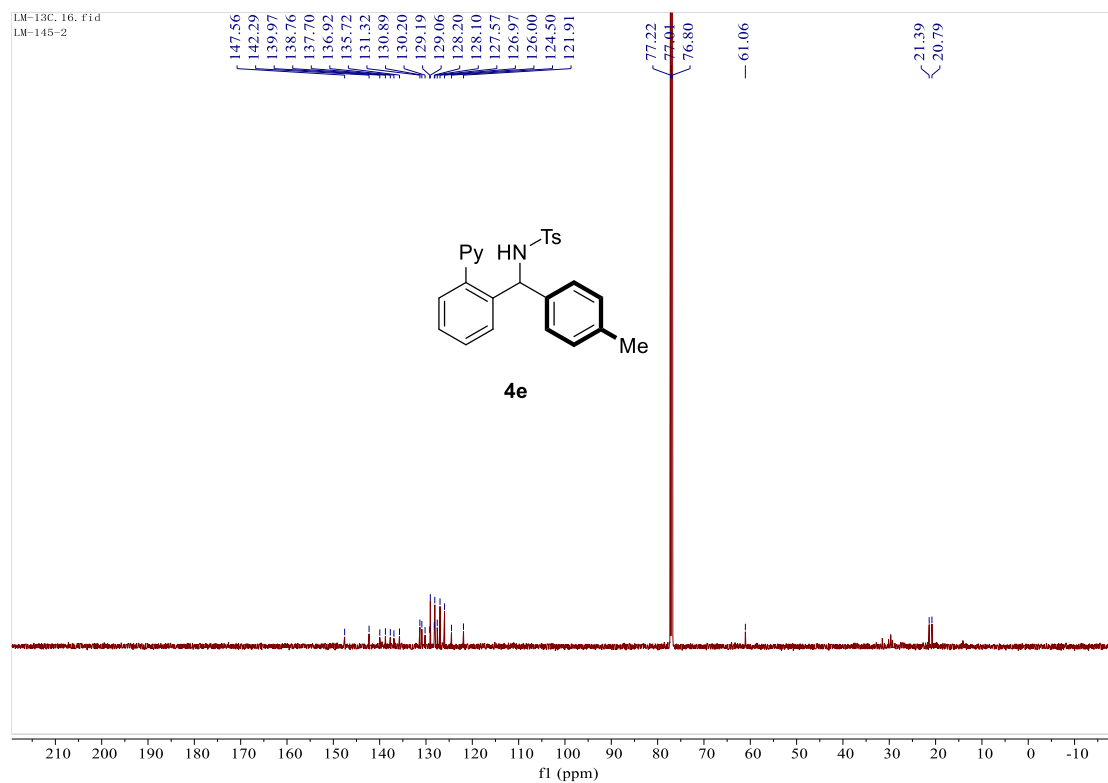

<sup>1</sup>H NMR (600 MHz, CDCl<sub>3</sub>) for **4f**

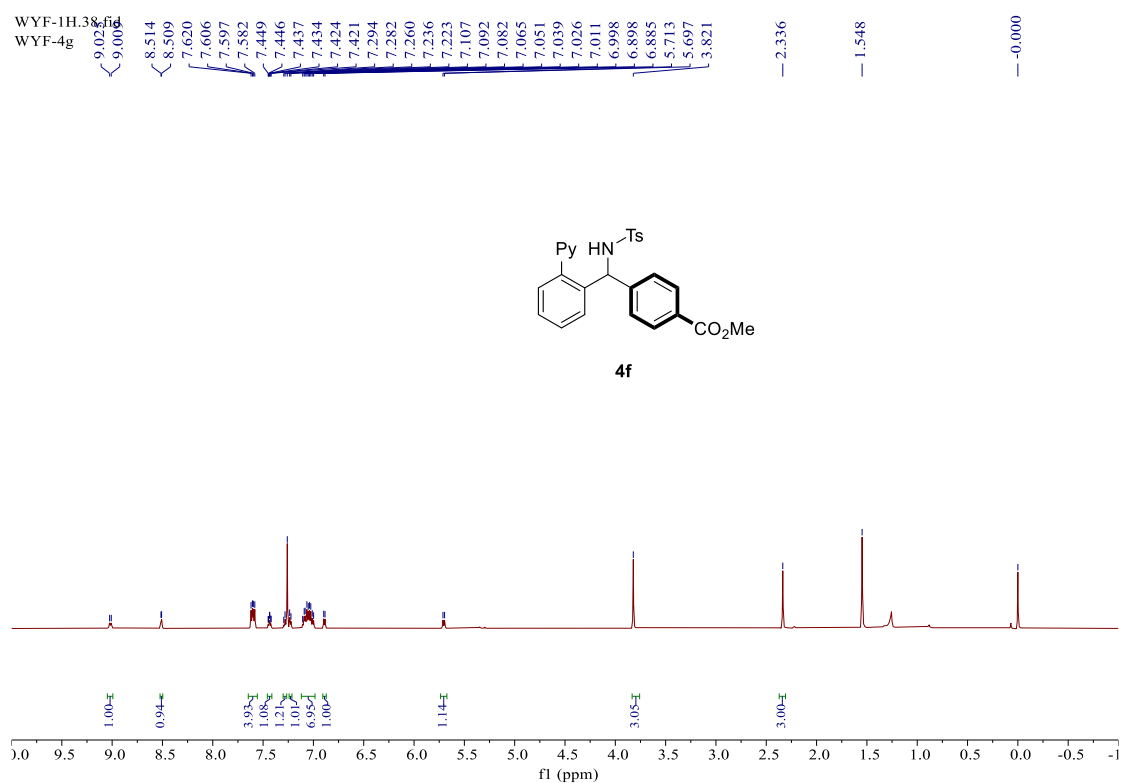

<sup>13</sup>C NMR (151 MHz, CDCl<sub>3</sub>) for **4f**

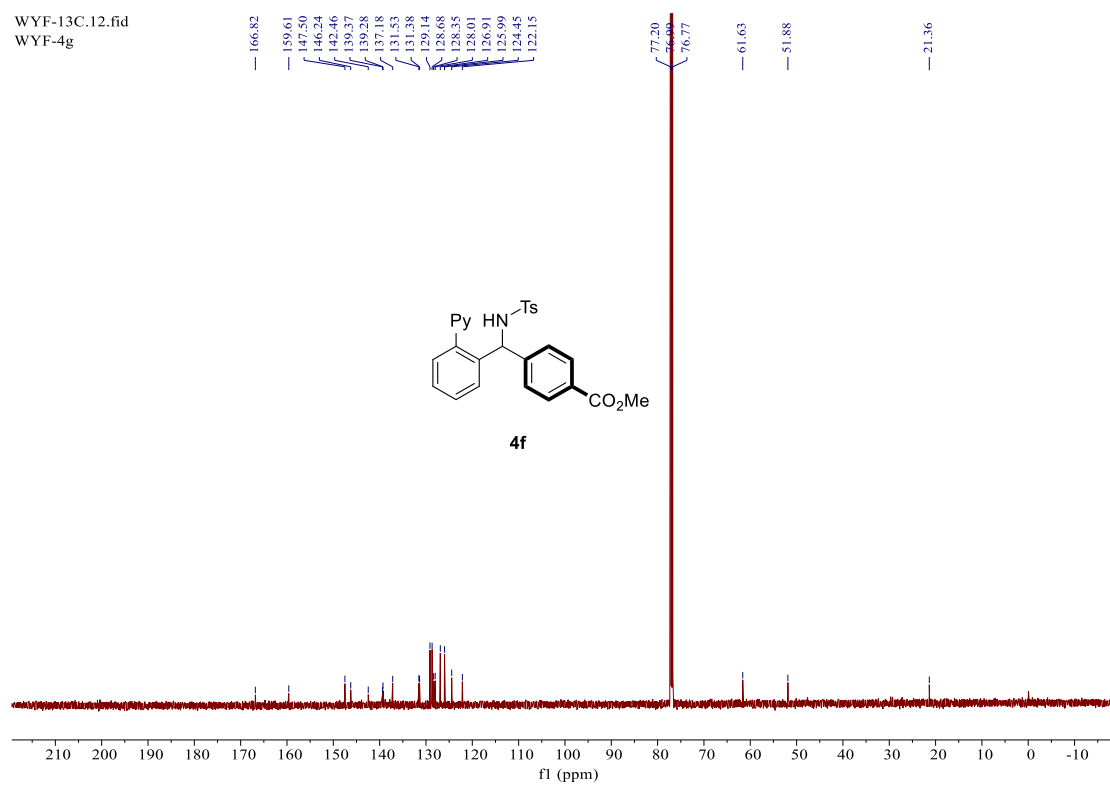

<sup>1</sup>H NMR (600 MHz, CDCl<sub>3</sub>) for **4g**

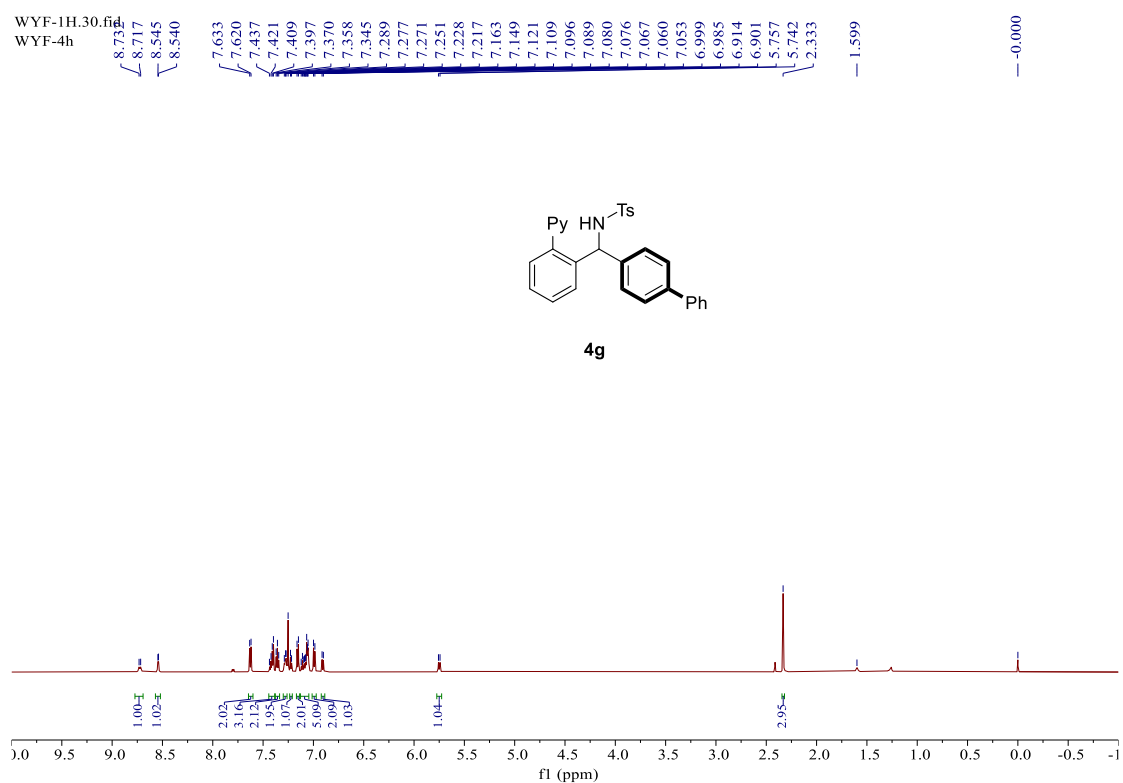

<sup>13</sup>C NMR (151 MHz, CDCl<sub>3</sub>) for **4g**

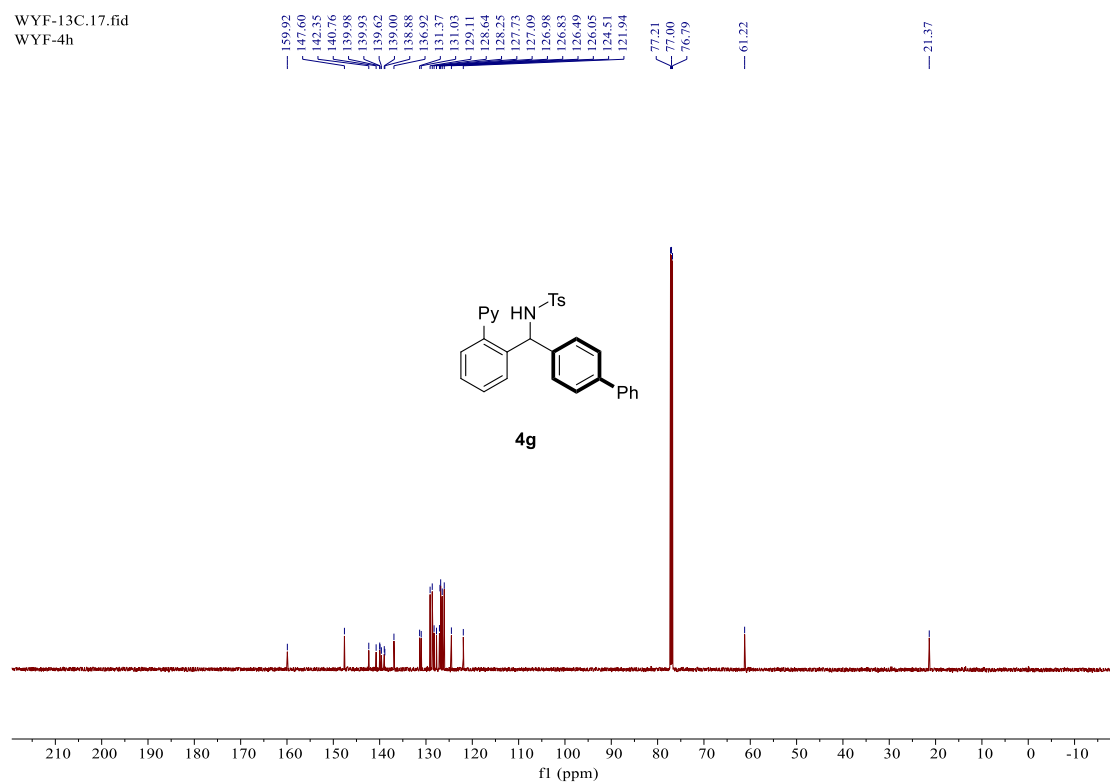

<sup>1</sup>H NMR (600 MHz, CDCl<sub>3</sub>) for **4h**

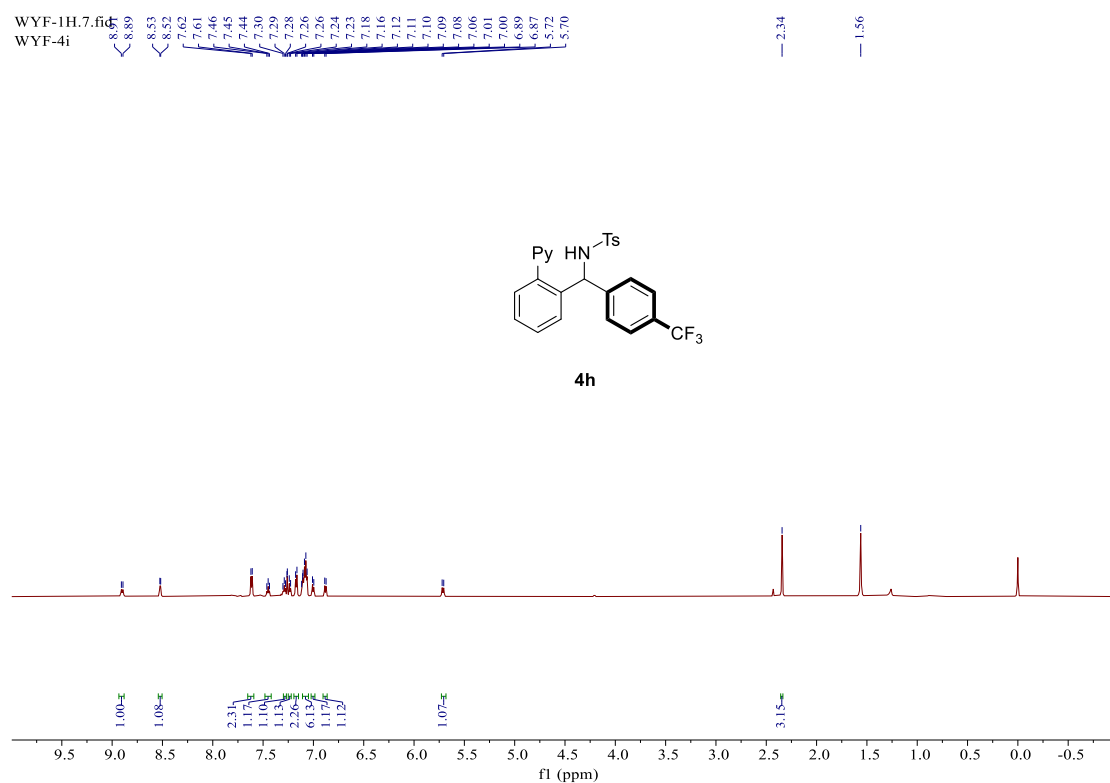

<sup>13</sup>C NMR (151 MHz, CDCl<sub>3</sub>) for **4h**

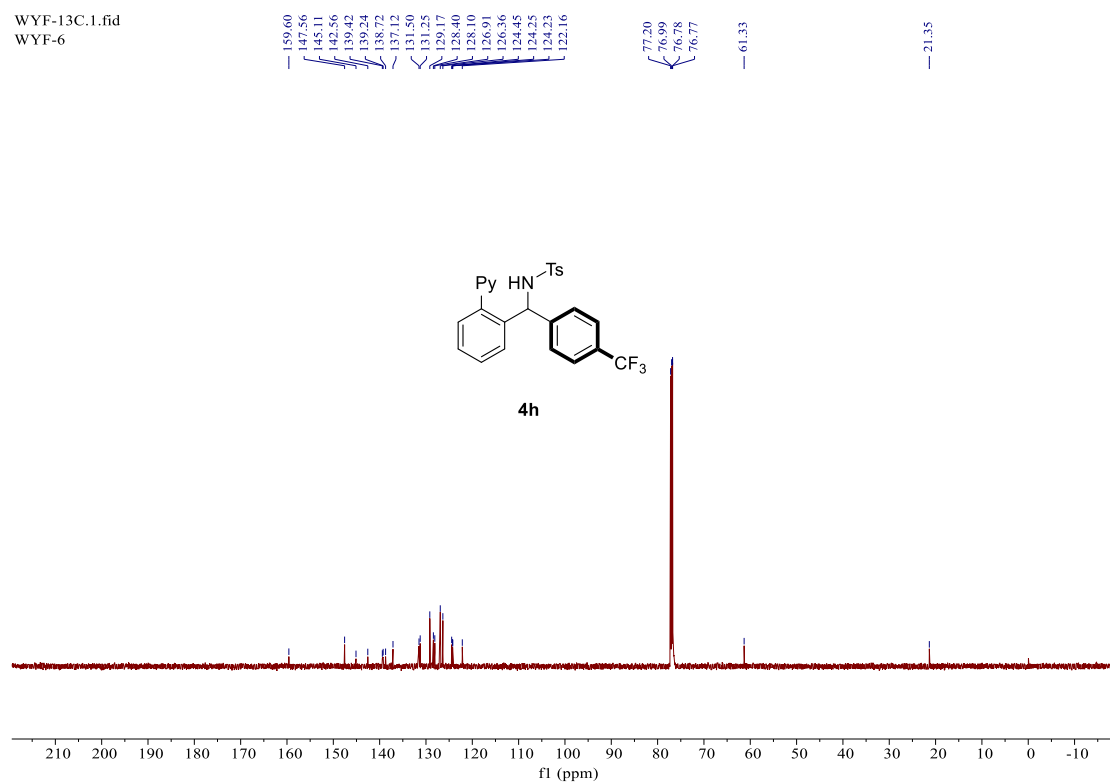



<sup>19</sup>F NMR (565 MHz, CDCl<sub>3</sub>) for **4h**

LM-19F.14.fid  
LM-223-2

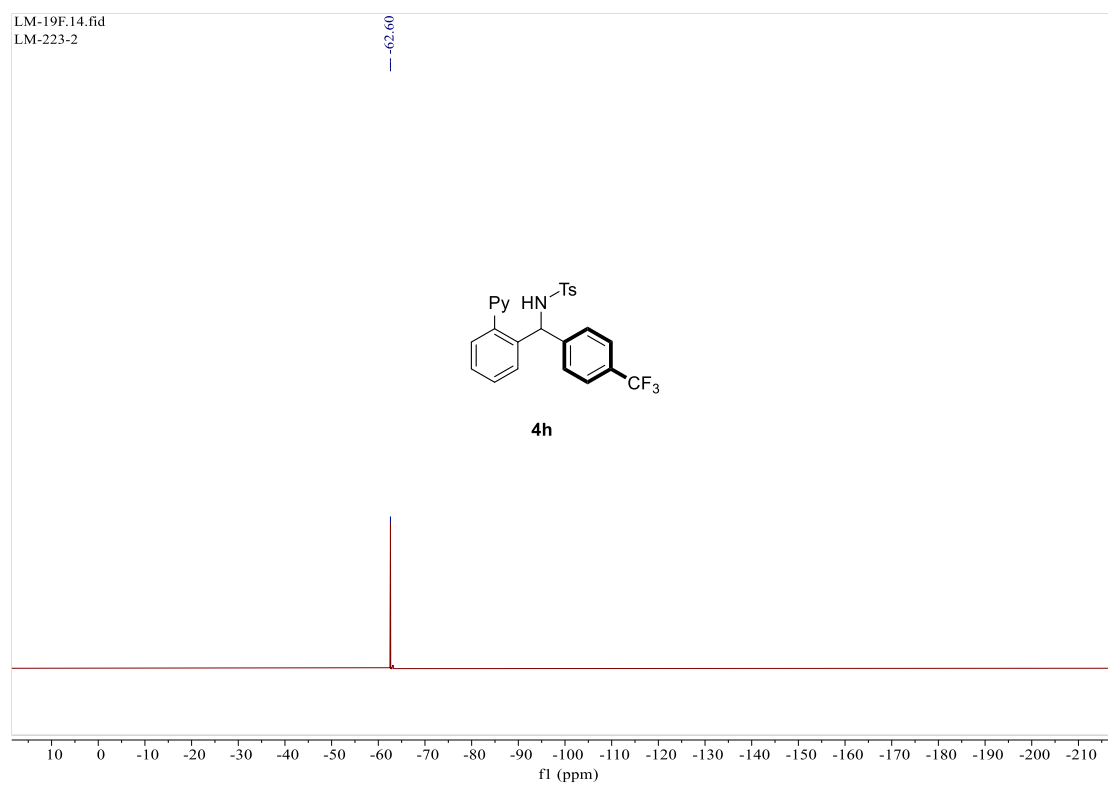

<sup>1</sup>H NMR (600 MHz, CDCl<sub>3</sub>) for **4i**

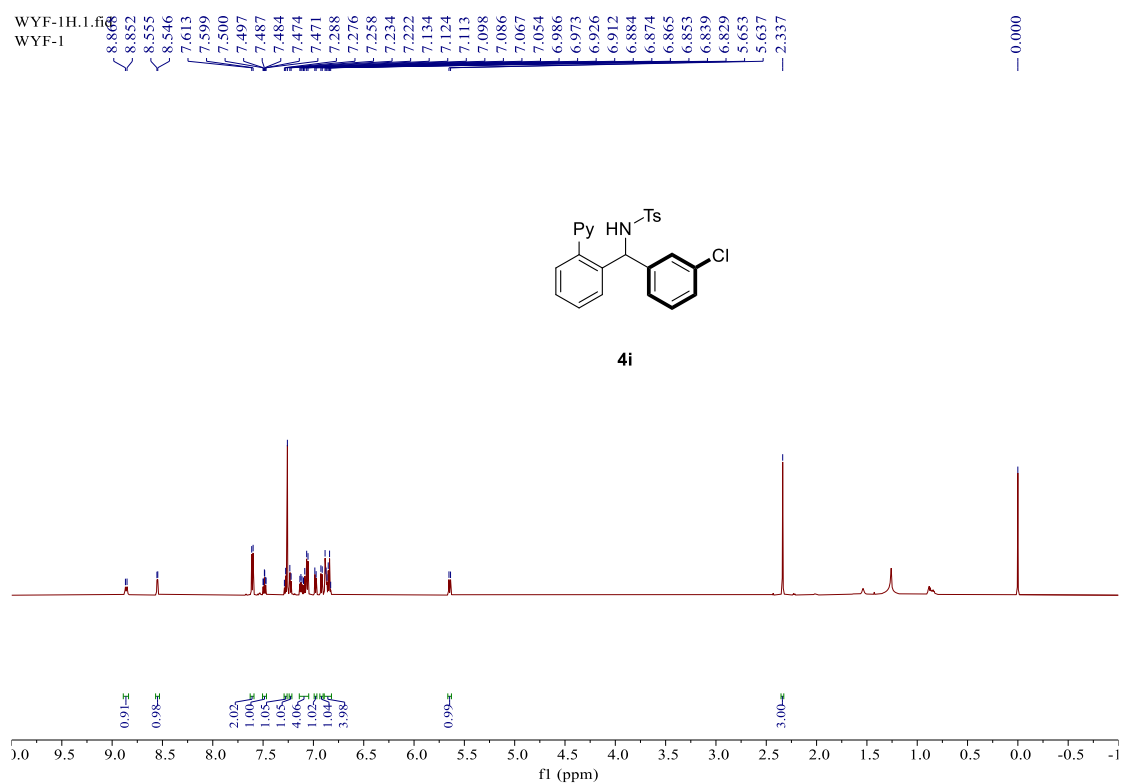

<sup>13</sup>C NMR (151 MHz, CDCl<sub>3</sub>) for **4i**

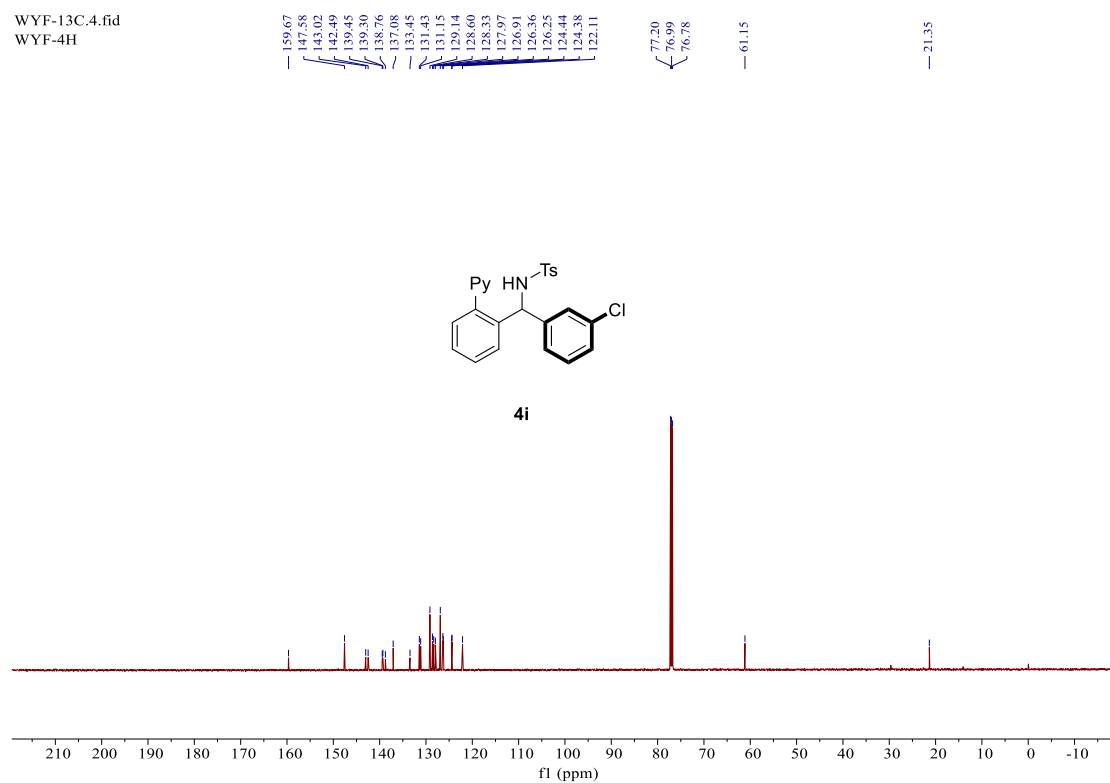

<sup>1</sup>H NMR (600 MHz, CDCl<sub>3</sub>) for **4j**

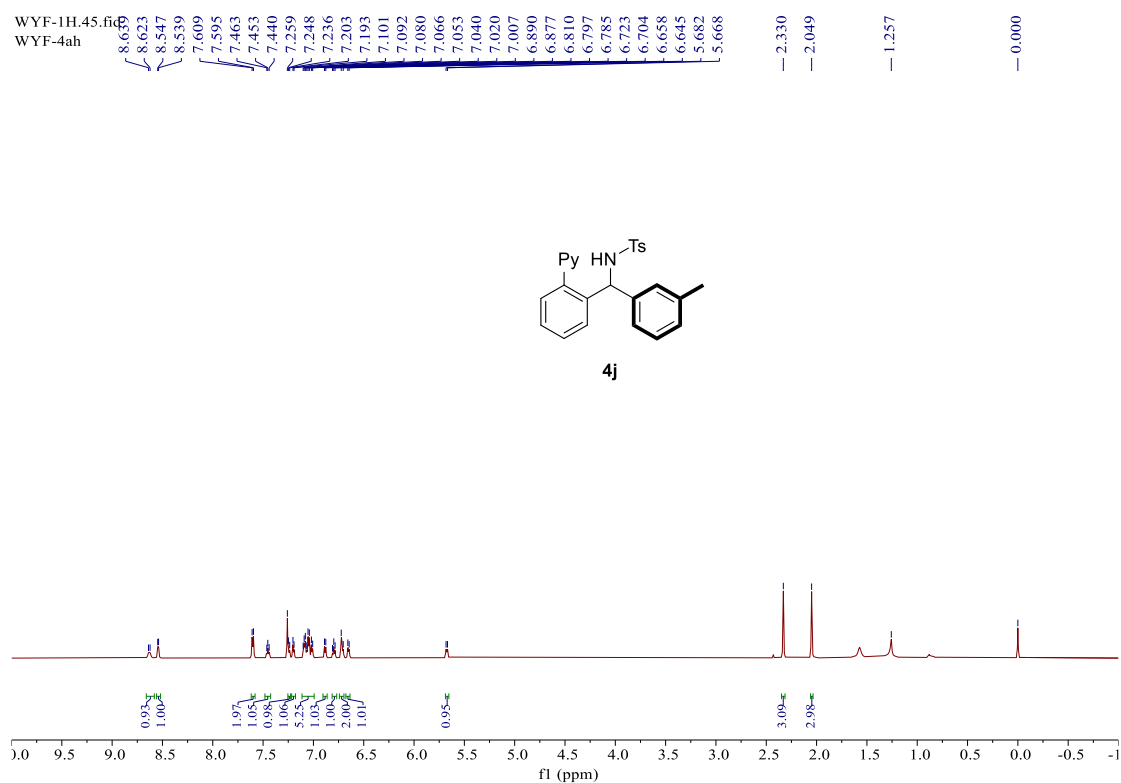

<sup>13</sup>C NMR (151 MHz, CDCl<sub>3</sub>) for **4j**

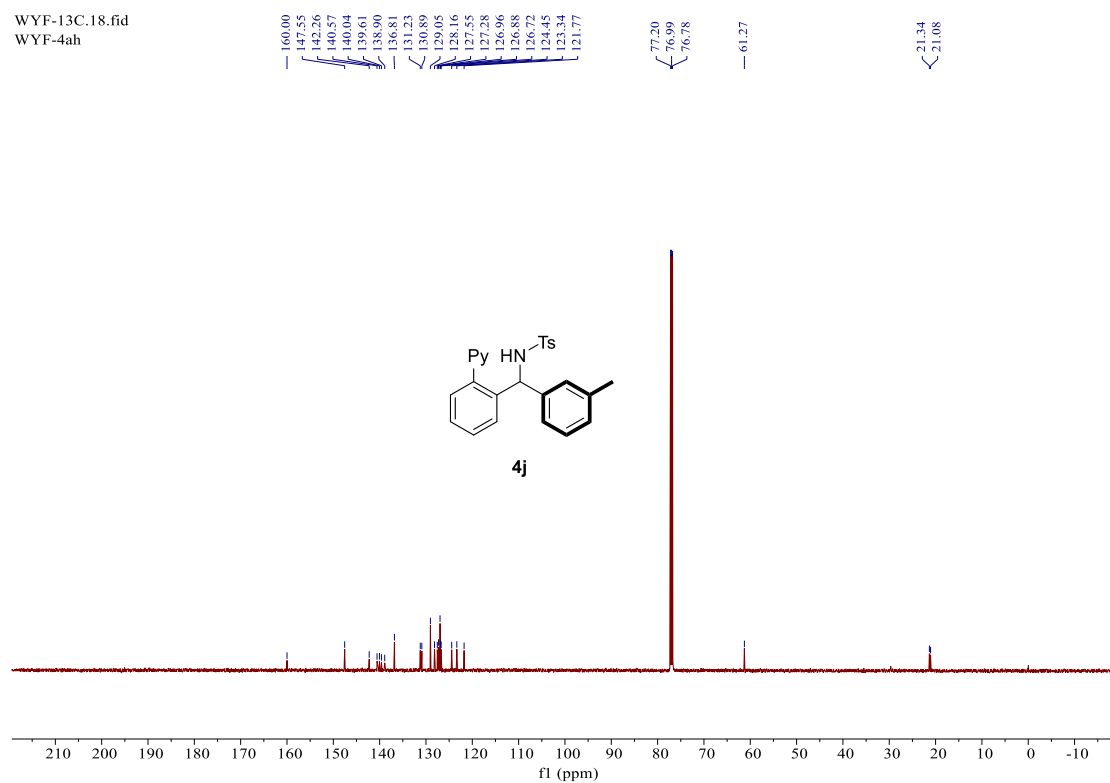

<sup>1</sup>H NMR (600 MHz, CDCl<sub>3</sub>) for **4k**

WYF-1H.64.fid  
WFF-4J

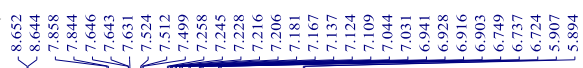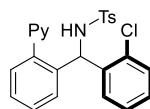

**4k**

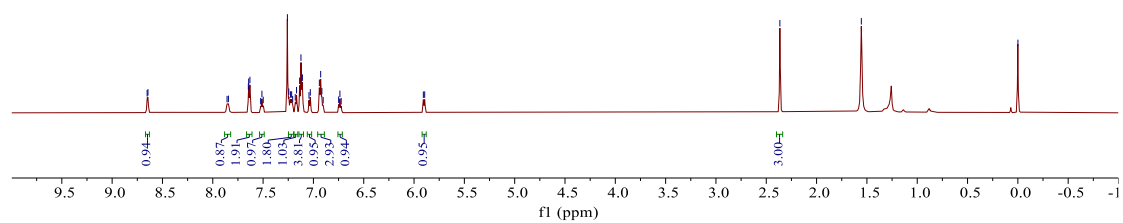

<sup>13</sup>C NMR (101 MHz, CDCl<sub>3</sub>) for **4k**

LM-224-1.1.fid

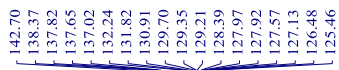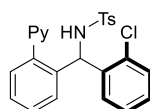

**4k**

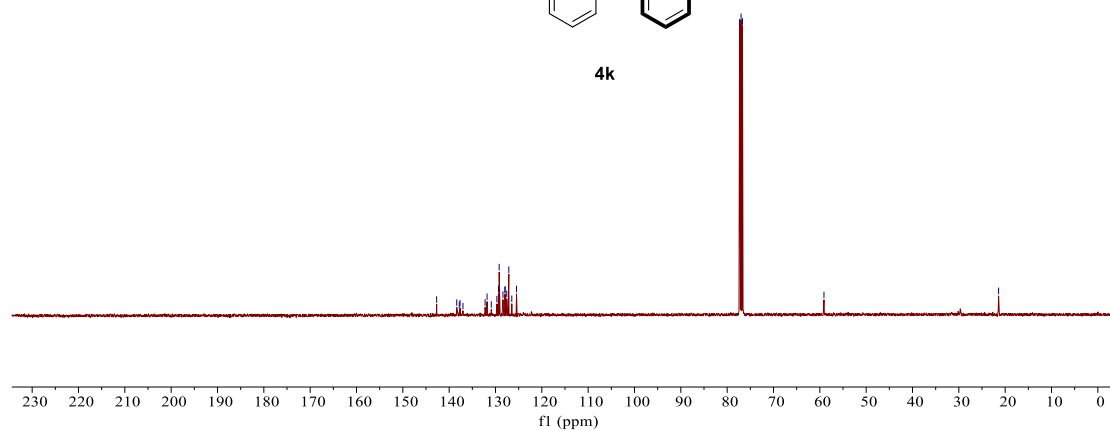

<sup>1</sup>H NMR (600 MHz, CDCl<sub>3</sub>) for **41**

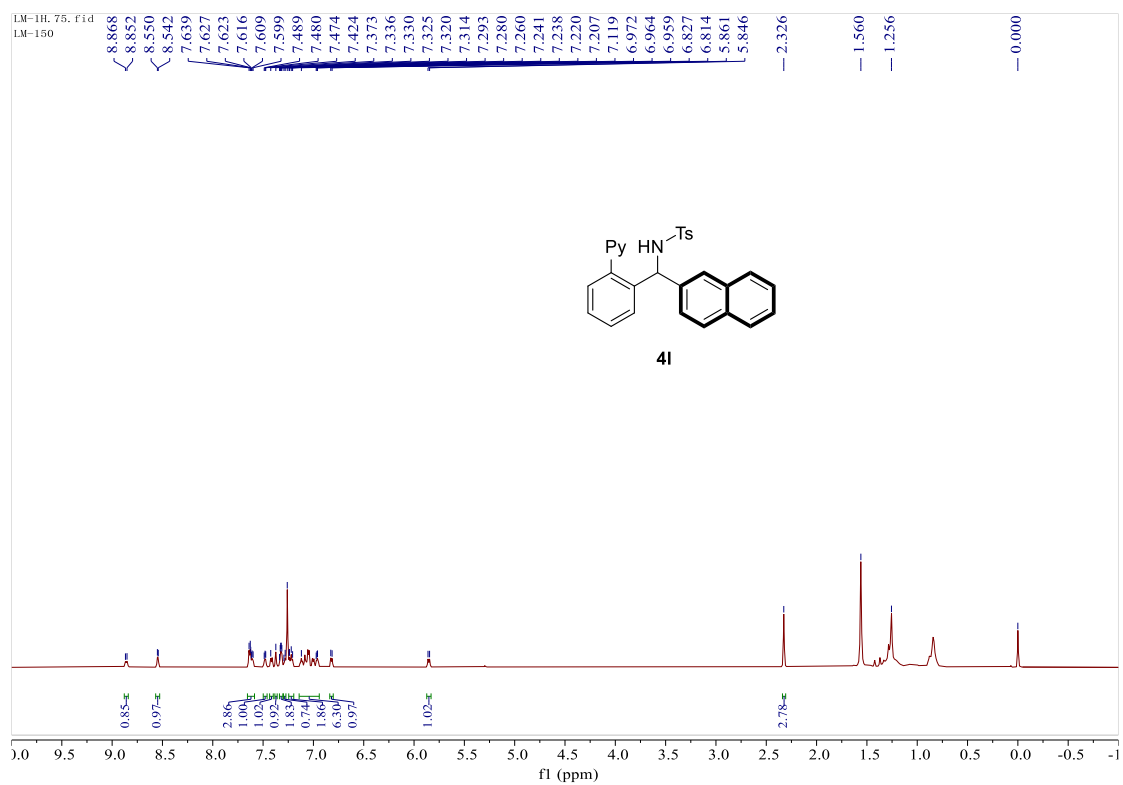

<sup>13</sup>C NMR (101 MHz, CDCl<sub>3</sub>) for **41**

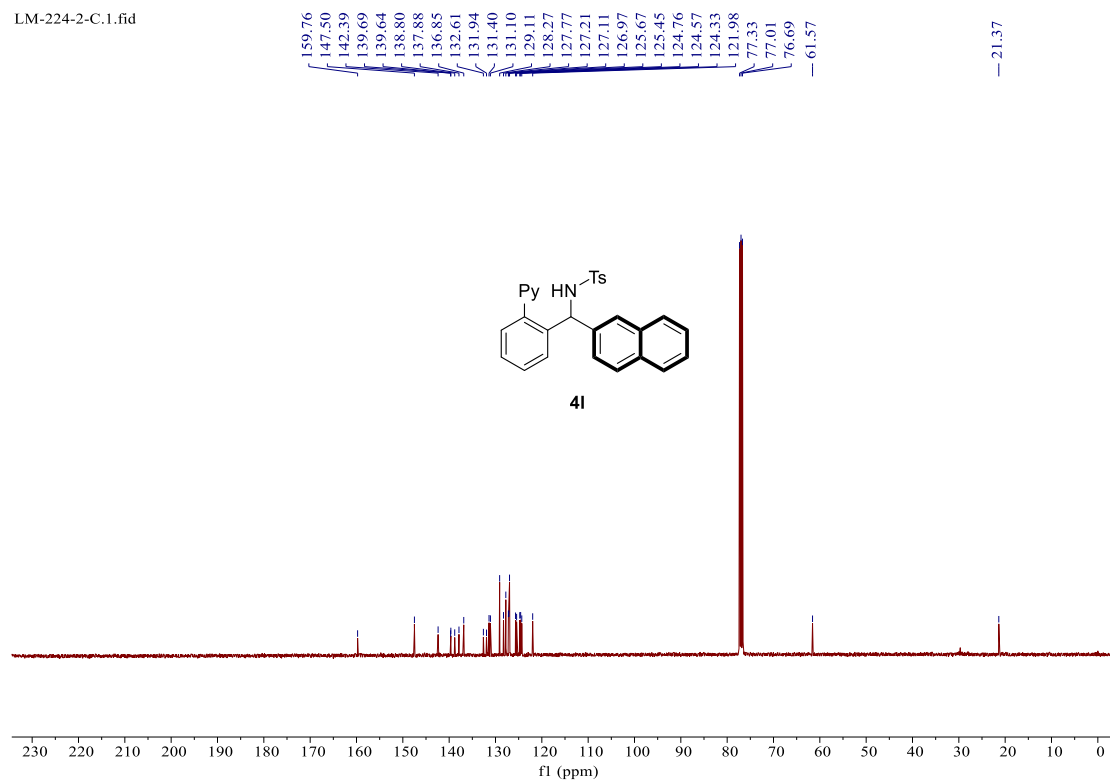

<sup>1</sup>H NMR (600 MHz, CDCl<sub>3</sub>) for **4m**

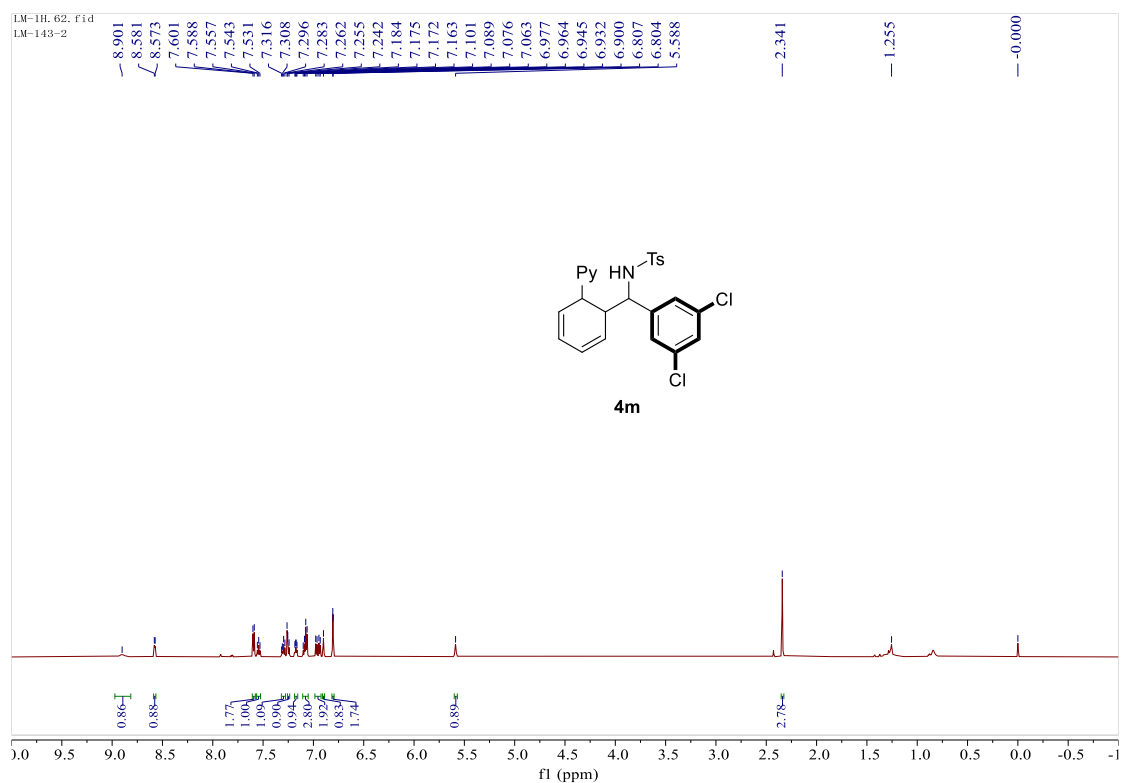

<sup>13</sup>C NMR (151 MHz, CDCl<sub>3</sub>) for **4m**

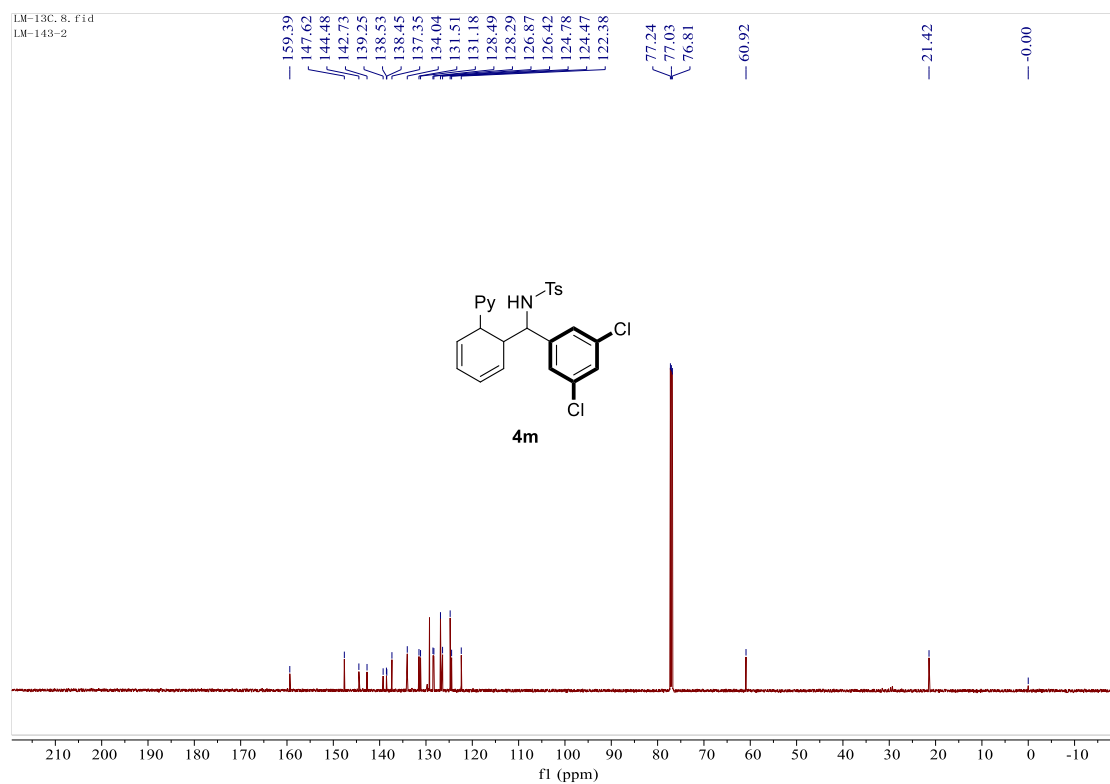

<sup>1</sup>H NMR (600 MHz, CDCl<sub>3</sub>) for **4n**

LM-1H-6  
LM-218-2  
8.976  
8.916  
8.525  
8.523  
8.521  
8.517  
8.514  
7.621  
7.618  
7.610  
7.607  
7.465  
7.462  
7.452  
7.449  
7.439  
7.436  
7.234  
7.230  
7.220  
7.217  
7.188  
7.174  
7.146  
7.132  
7.121  
7.119  
7.112  
7.108  
7.106  
7.099  
7.092  
7.079  
6.853  
6.851  
6.850  
6.840  
6.838  
6.836  
6.817  
6.813  
5.990  
5.574  
2.370  
1.589

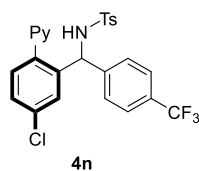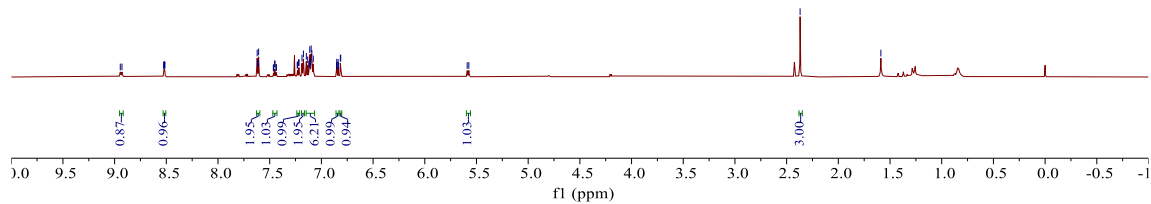

<sup>13</sup>C NMR (151 MHz, CDCl<sub>3</sub>) for **4n**

LM-13C\_3.fid  
LM-218-2

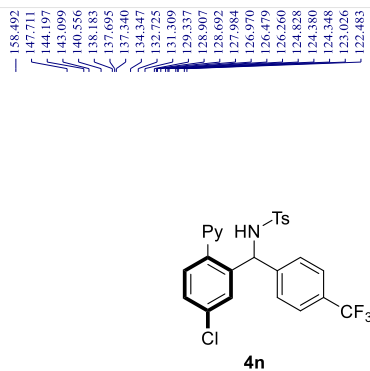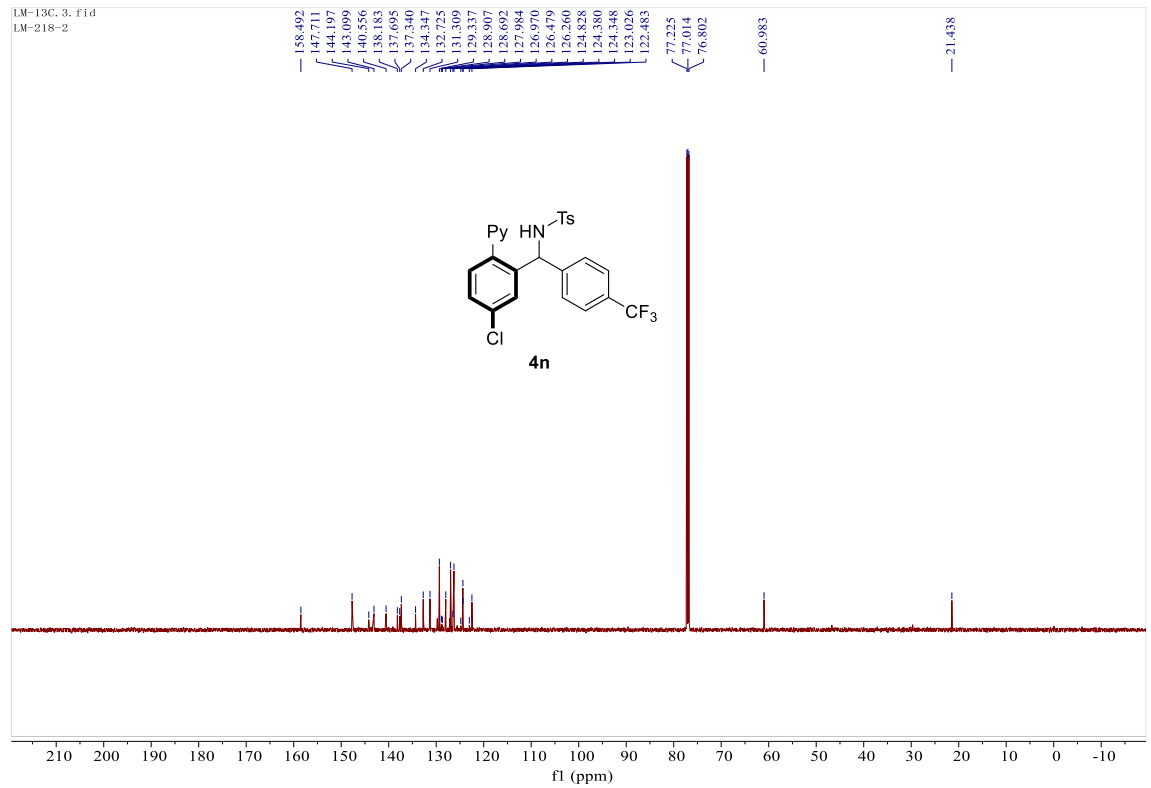

<sup>19</sup>F NMR (565 MHz, CDCl<sub>3</sub>) for **4n**

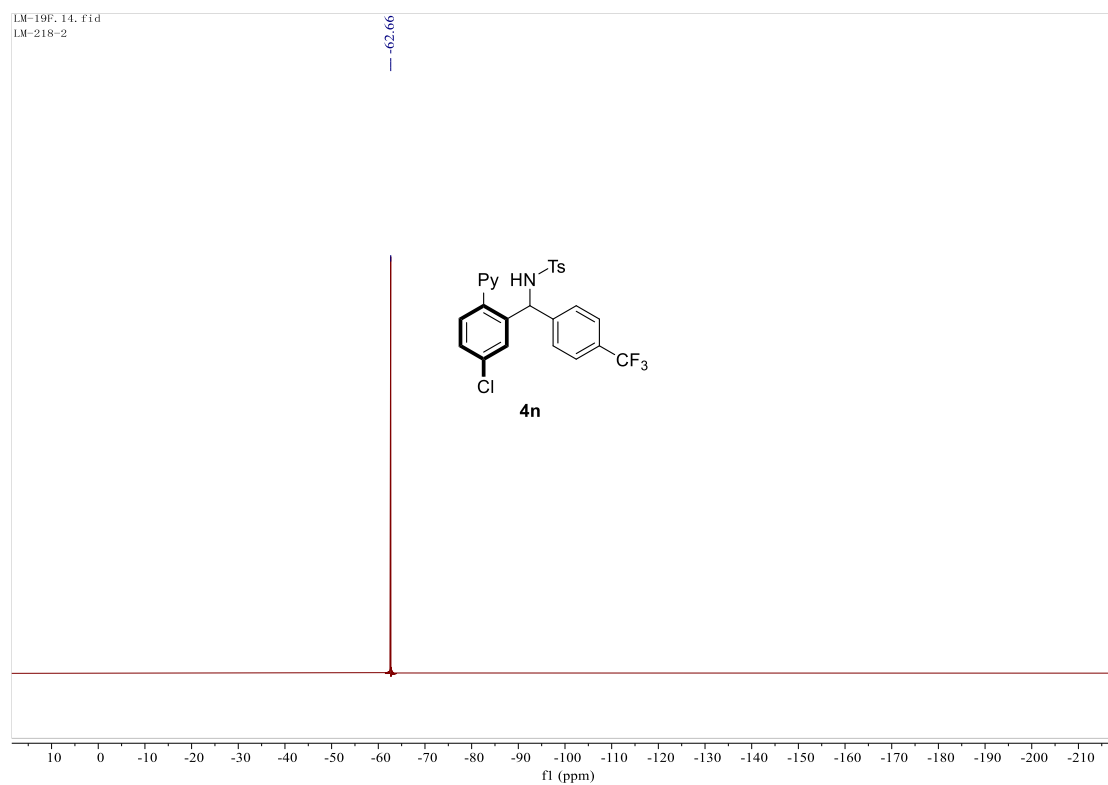

<sup>1</sup>H NMR (600 MHz, CDCl<sub>3</sub>) for **4o**

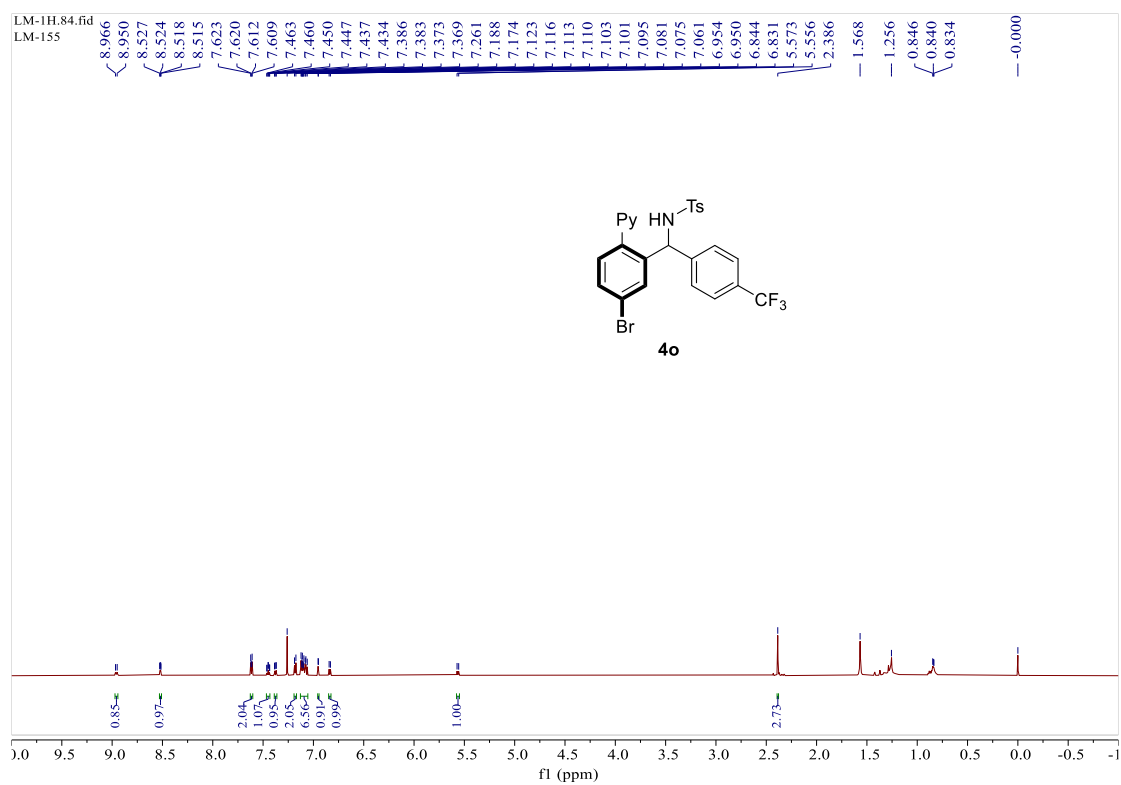





<sup>1</sup>H NMR (600 MHz, CDCl<sub>3</sub>) for **4p**

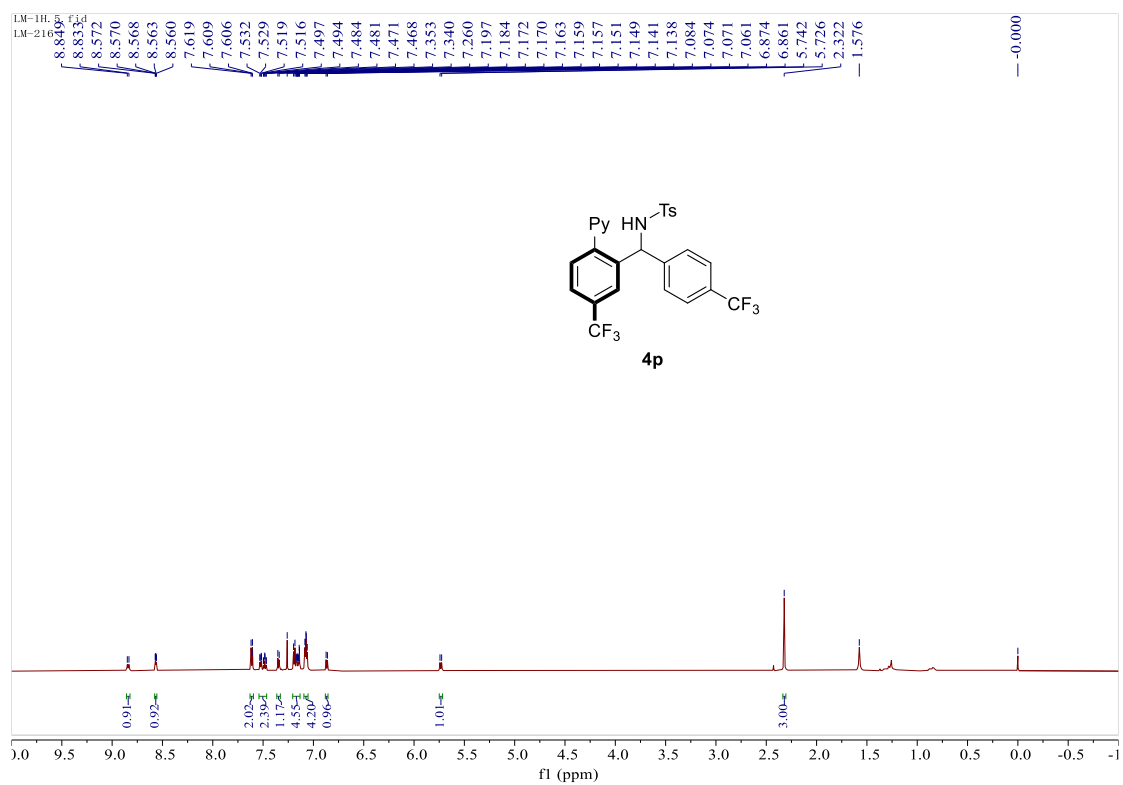

<sup>13</sup>C NMR (151 MHz, CDCl<sub>3</sub>) for **4p**

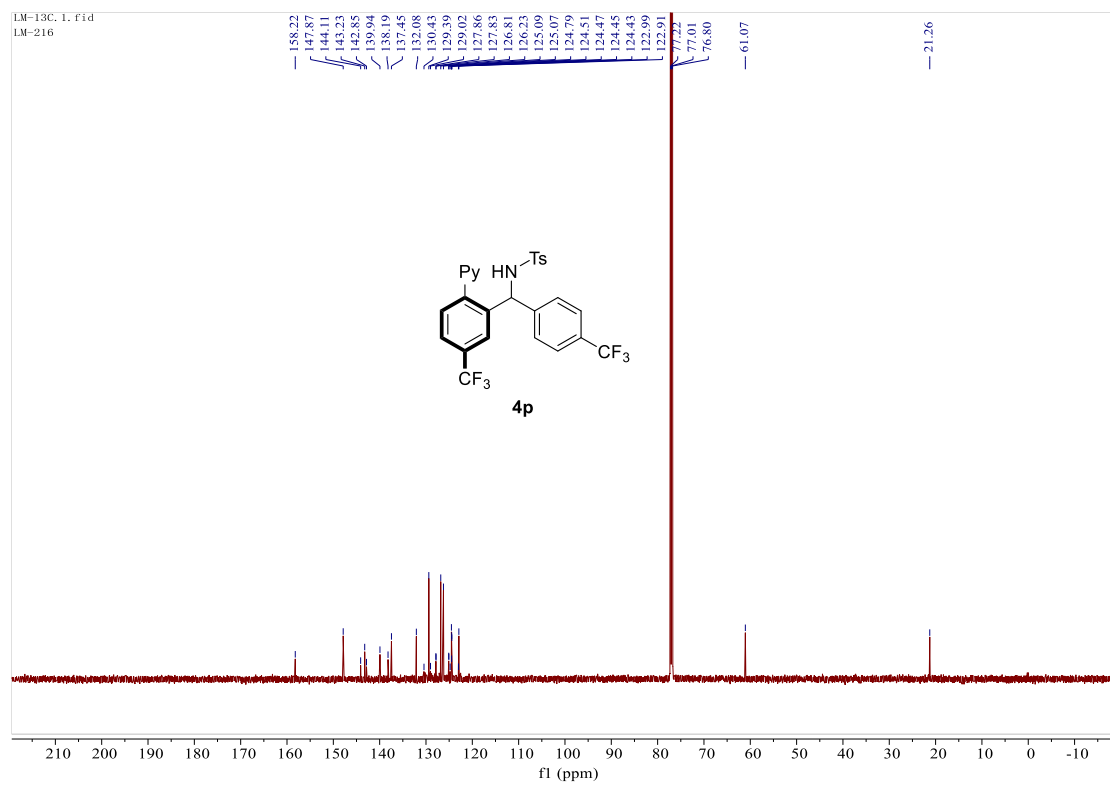

<sup>19</sup>F NMR (565 MHz, CDCl<sub>3</sub>) for **4p**

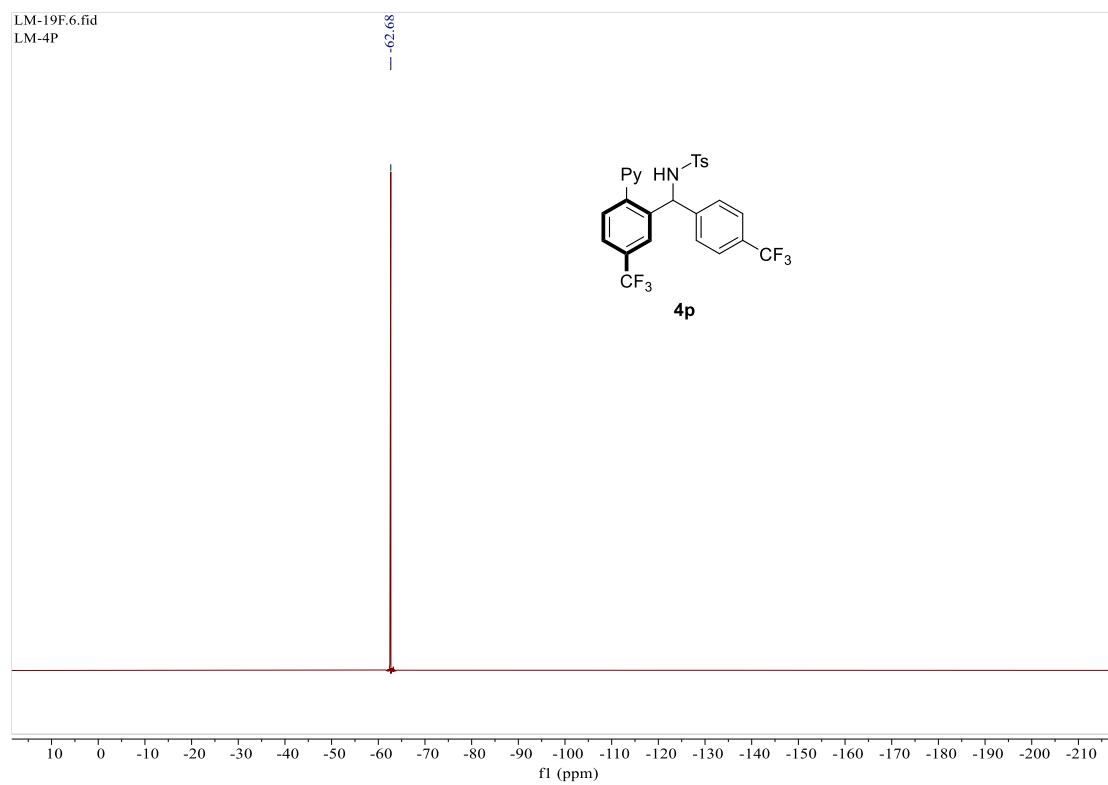

<sup>1</sup>H NMR (600 MHz, CDCl<sub>3</sub>) for **4q**

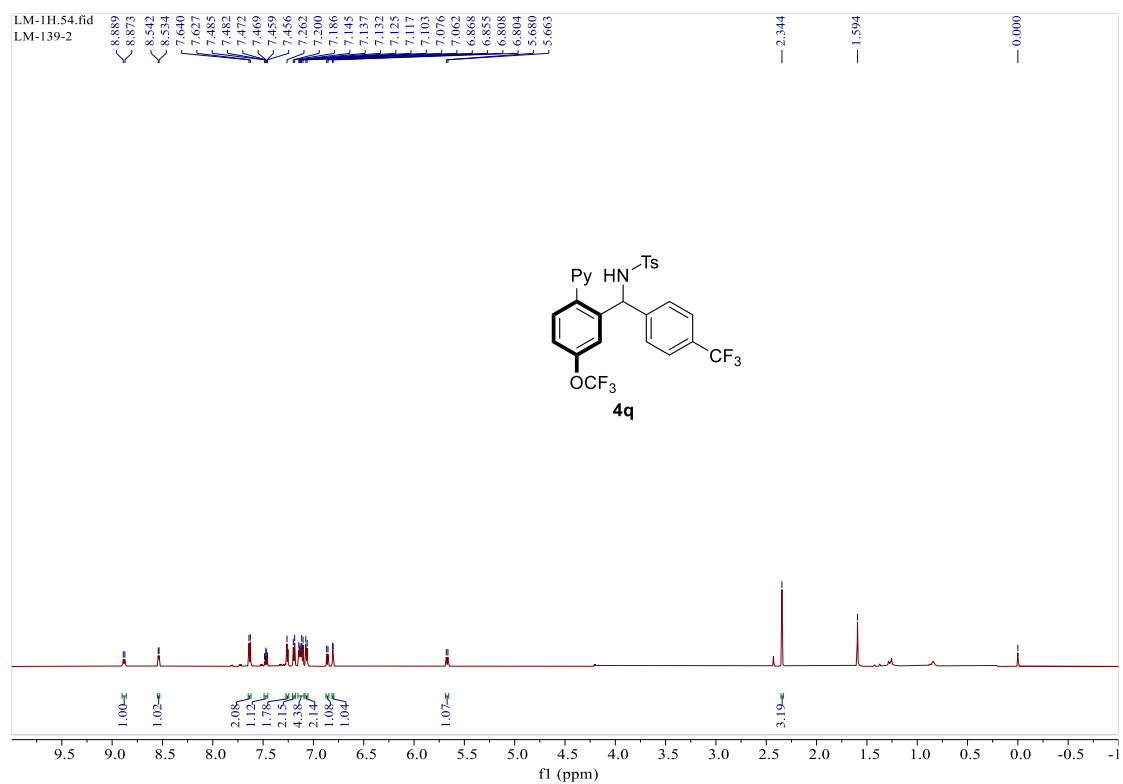

<sup>13</sup>C NMR (151 MHz, CDCl<sub>3</sub>) for **4q**

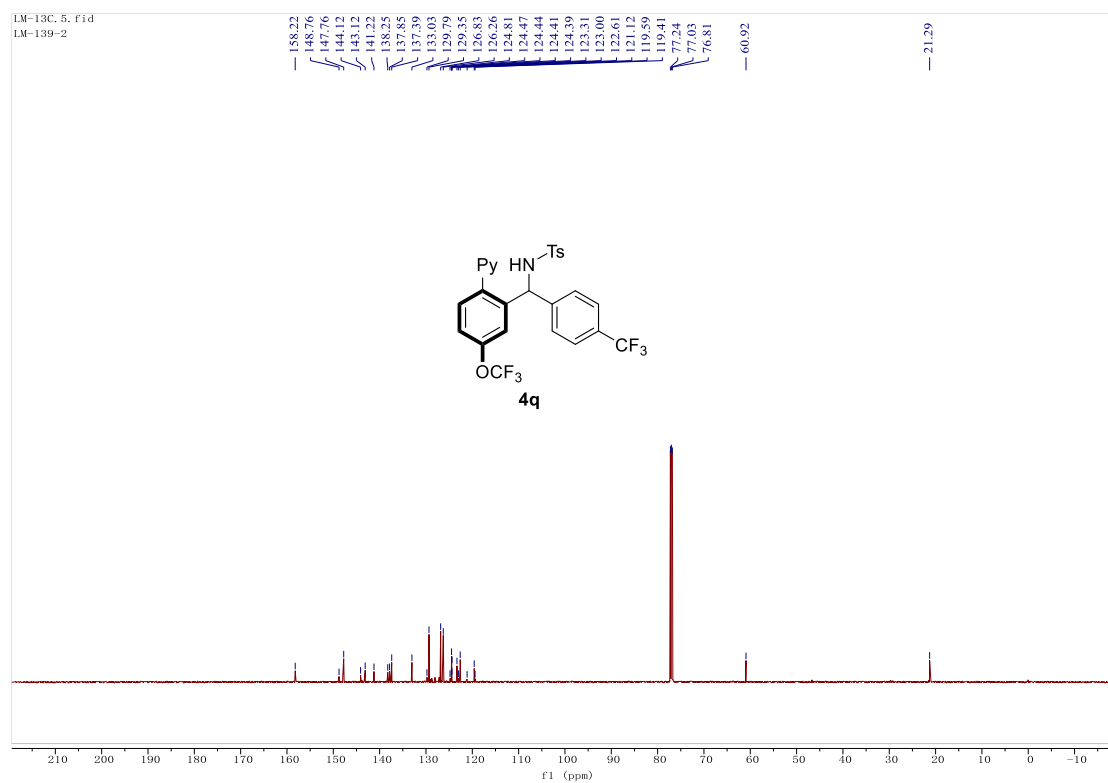

<sup>19</sup>F NMR (565 MHz, CDCl<sub>3</sub>) for **4q**

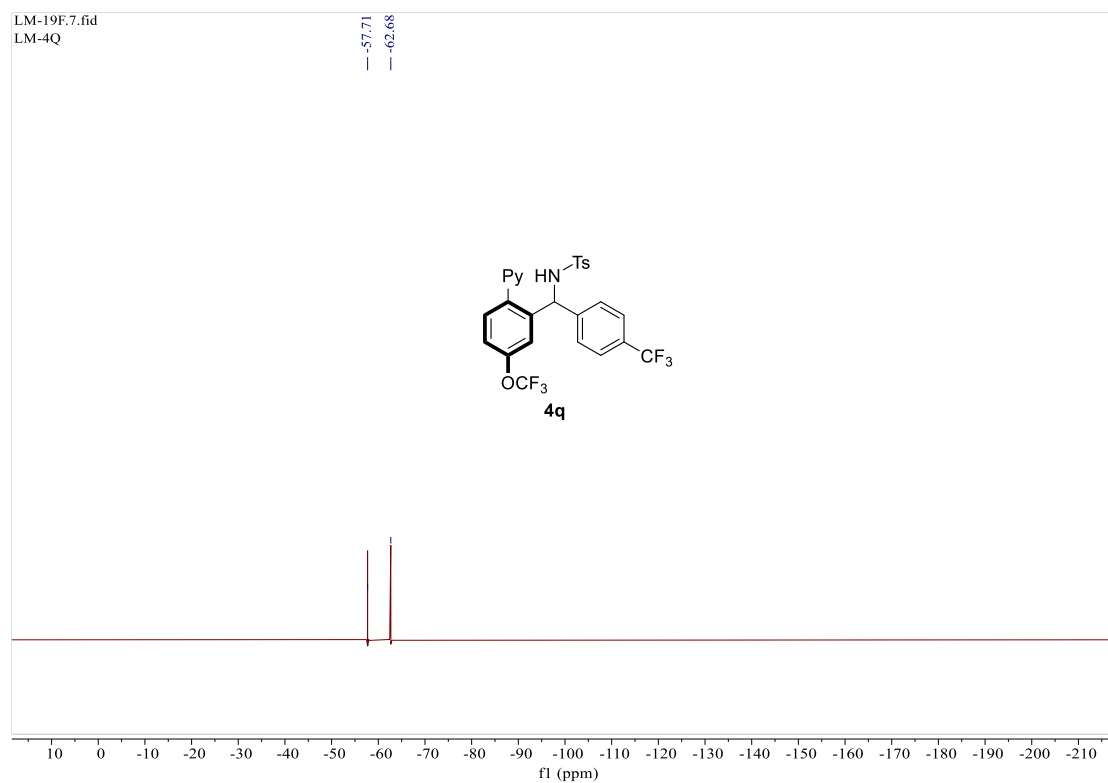

<sup>1</sup>H NMR (600 MHz, CDCl<sub>3</sub>) for **4r**

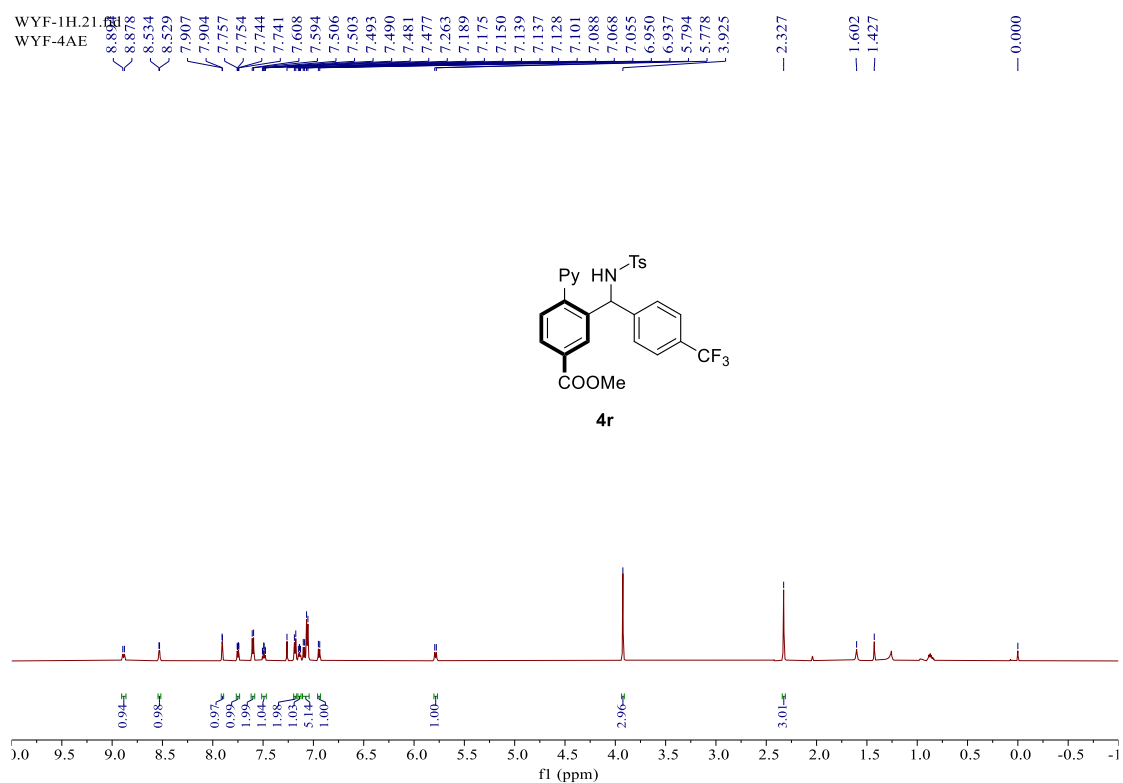

<sup>13</sup>C NMR (151 MHz, CDCl<sub>3</sub>) for **4r**

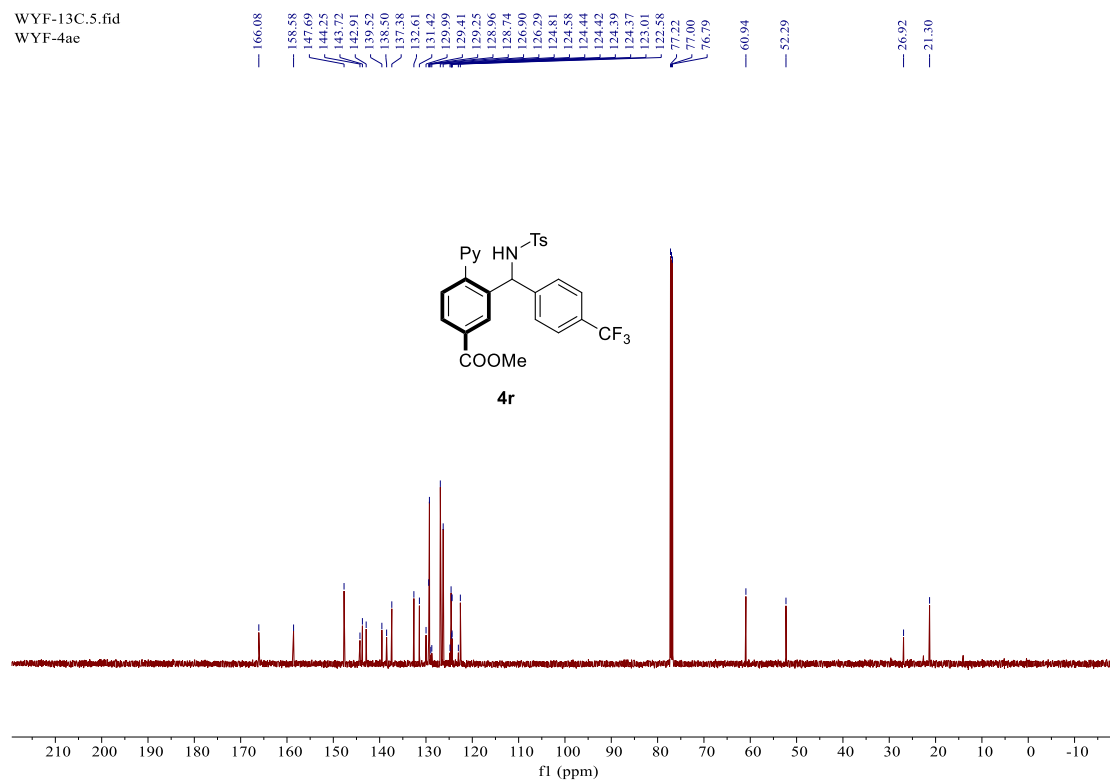

<sup>19</sup>F NMR (565 MHz, CDCl<sub>3</sub>) for **4r**

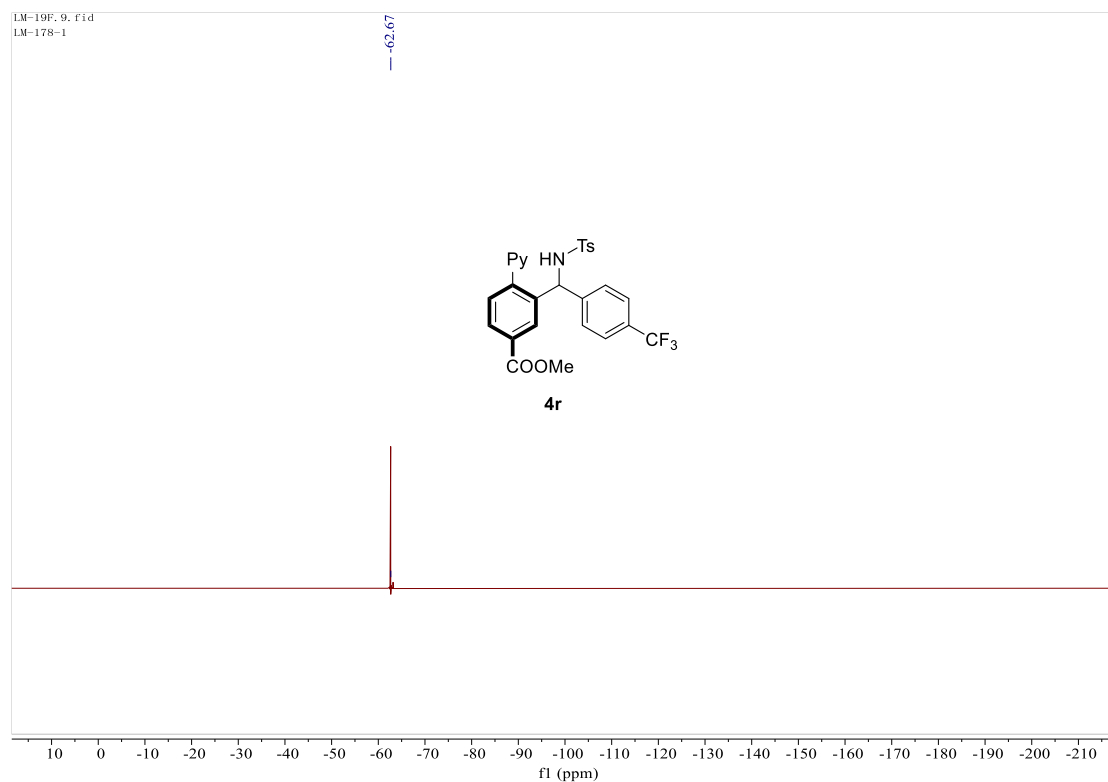

<sup>1</sup>H NMR (600 MHz, CDCl<sub>3</sub>) for **4s**

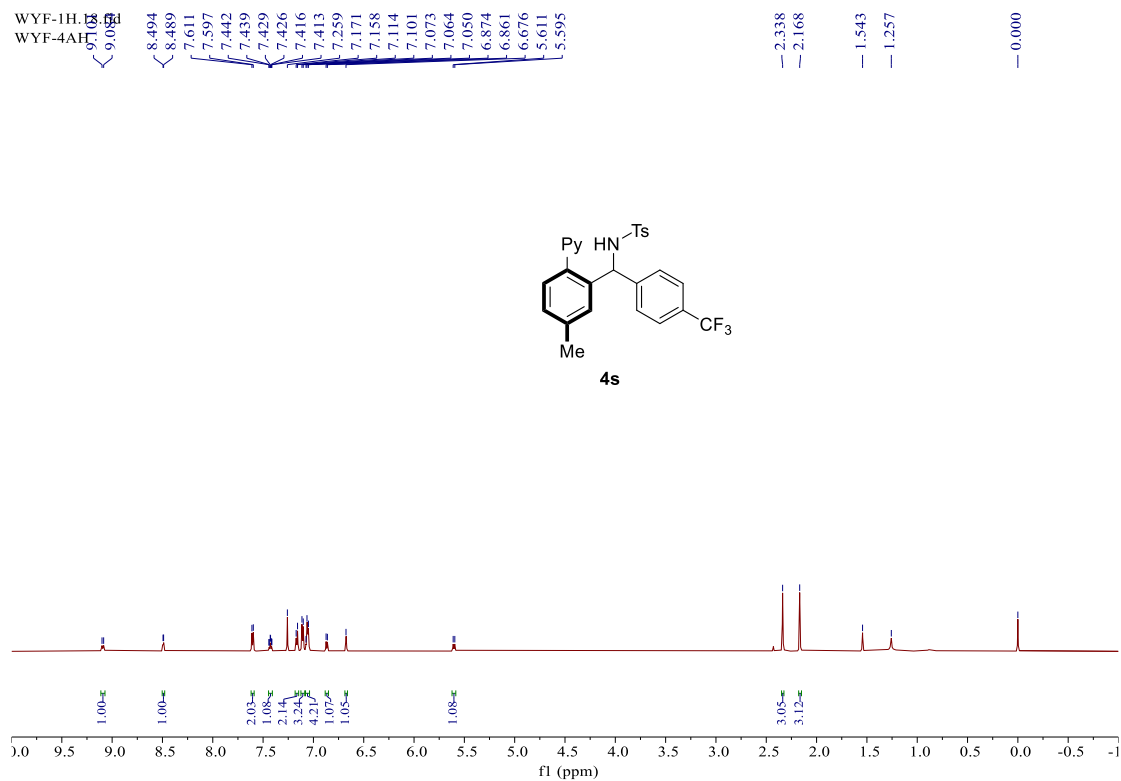

<sup>13</sup>C NMR (151 MHz, CDCl<sub>3</sub>) for **4s**

WYF-13C.6.fid  
WYF-4ah

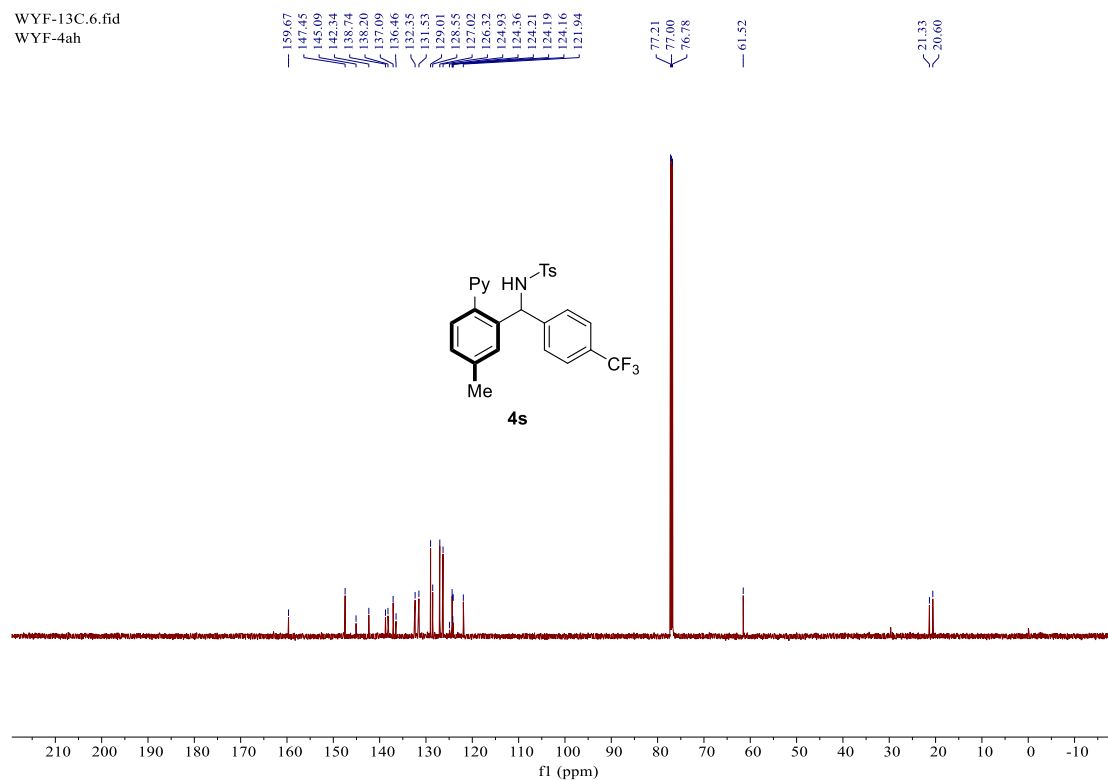

<sup>19</sup>F NMR (565 MHz, CDCl<sub>3</sub>) for **4s**

LM-19F. 2. F1d  
LM-4S

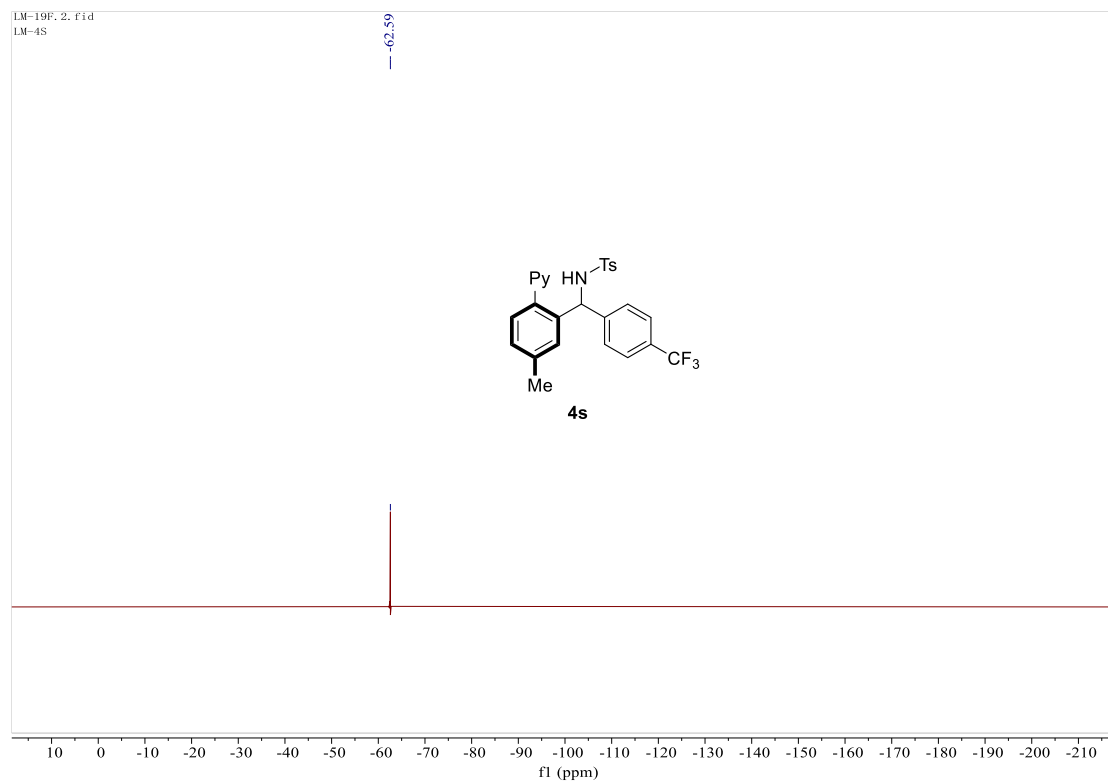

<sup>1</sup>H NMR (600 MHz, CDCl<sub>3</sub>) for **4t**

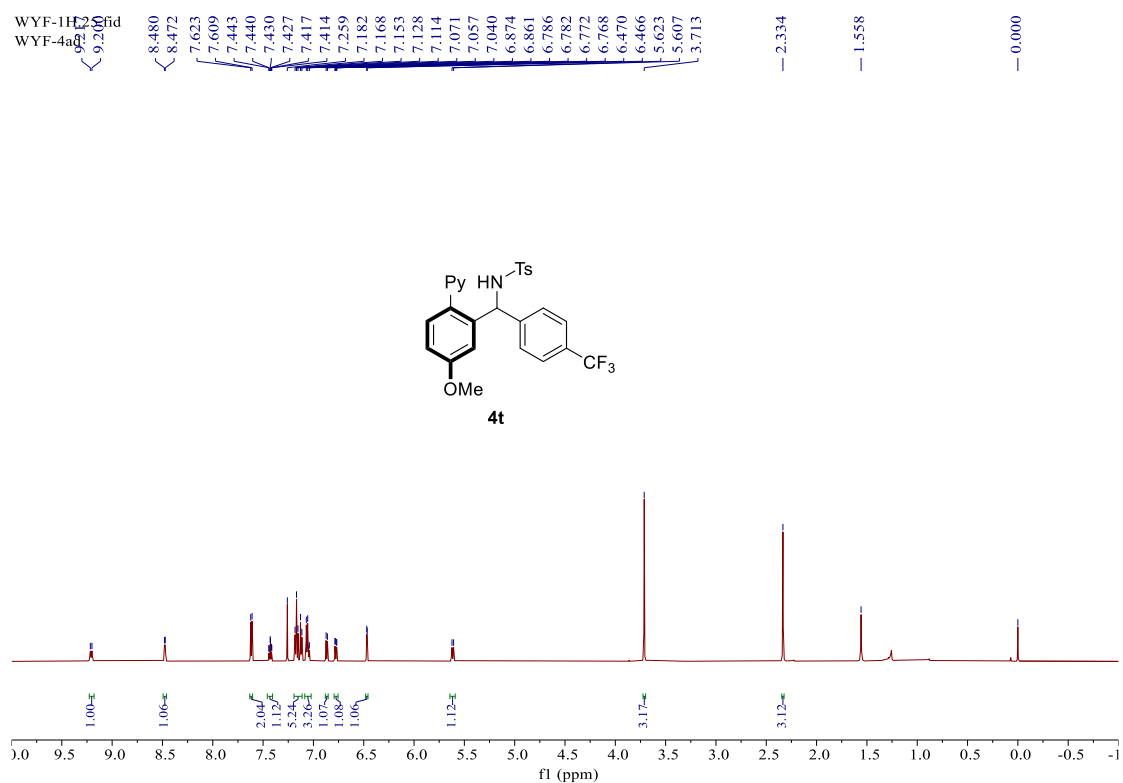

<sup>13</sup>C NMR (151 MHz, CDCl<sub>3</sub>) for **4t**

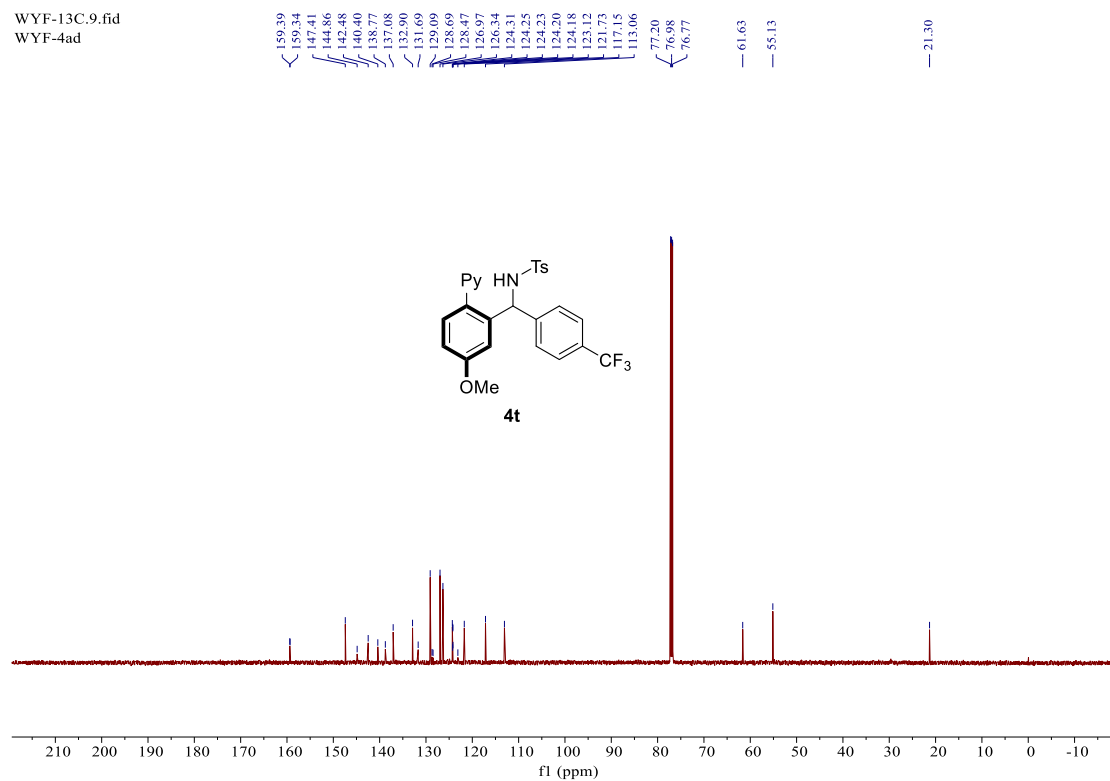



<sup>19</sup>F NMR (565 MHz, CDCl<sub>3</sub>) for **4t**

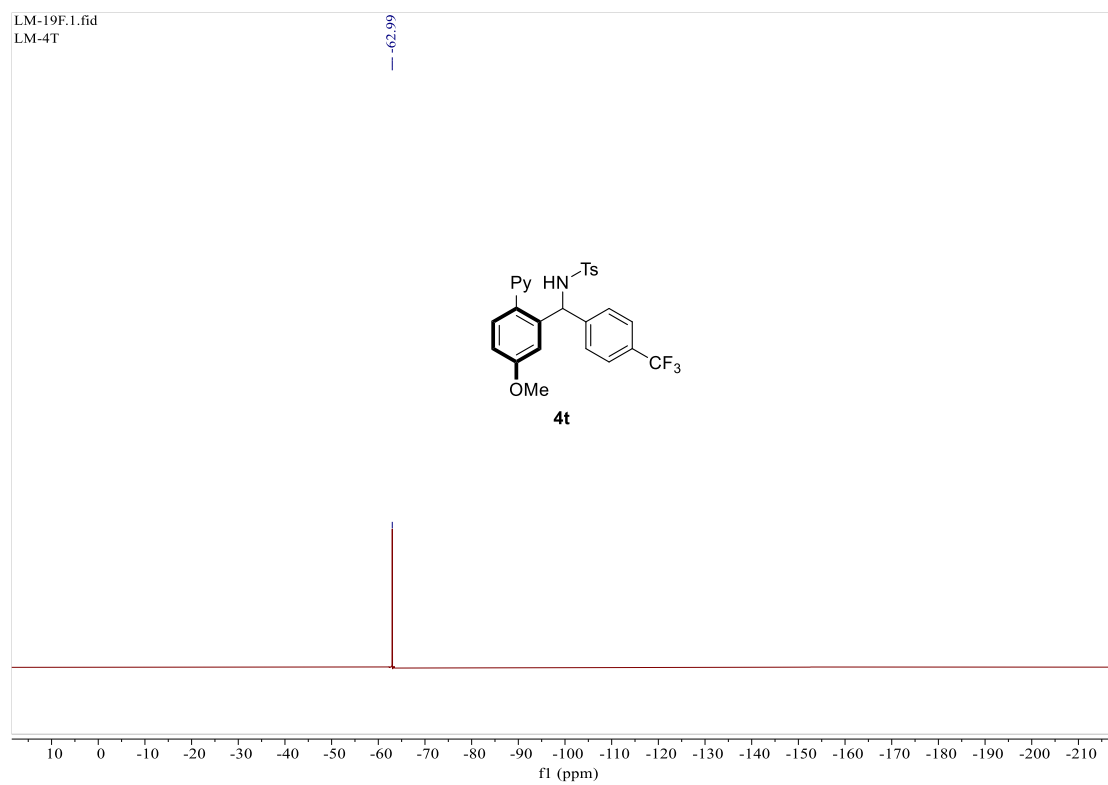

<sup>1</sup>H NMR (600 MHz, CDCl<sub>3</sub>) for **4u**

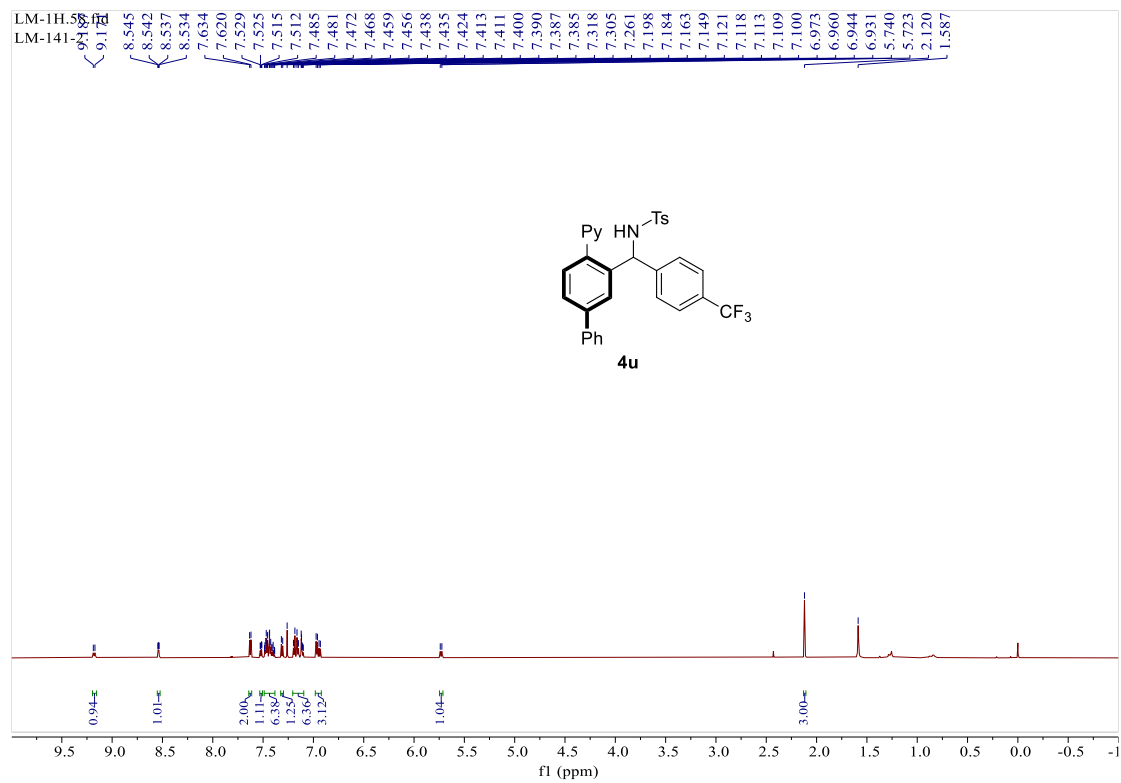

<sup>13</sup>C NMR (151 MHz, CDCl<sub>3</sub>) for **4u**

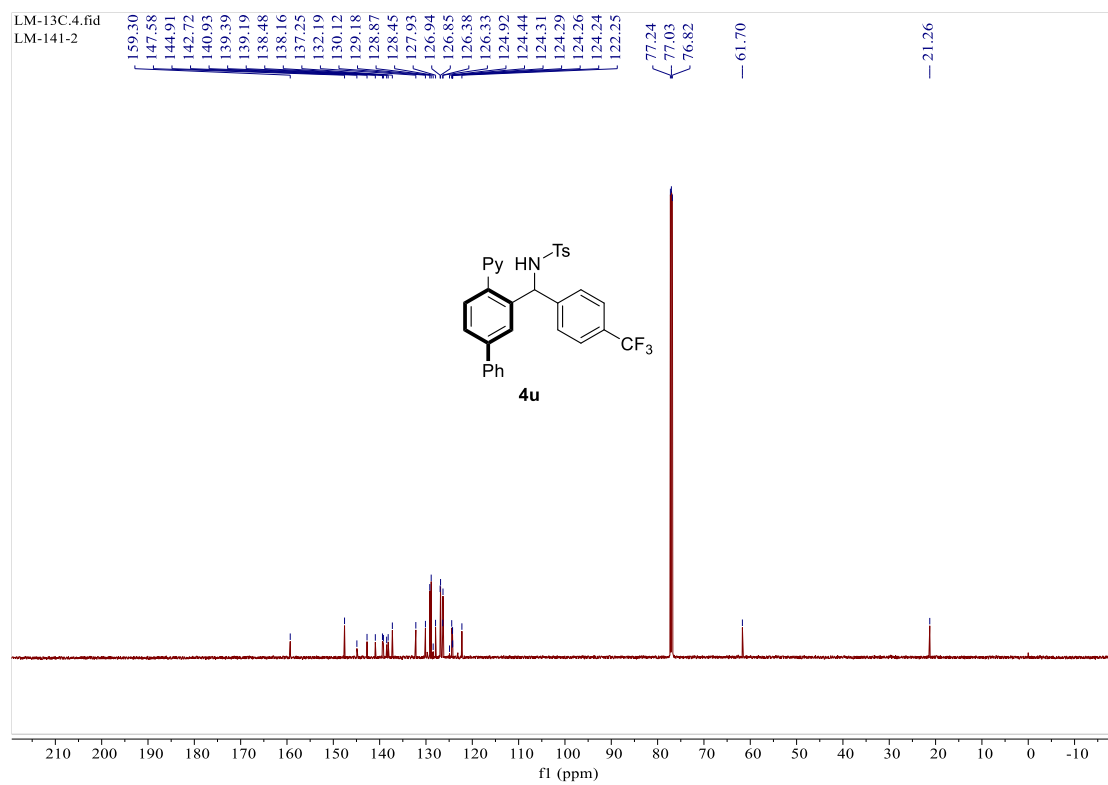

<sup>19</sup>F NMR (565 MHz, CDCl<sub>3</sub>) for **4u**

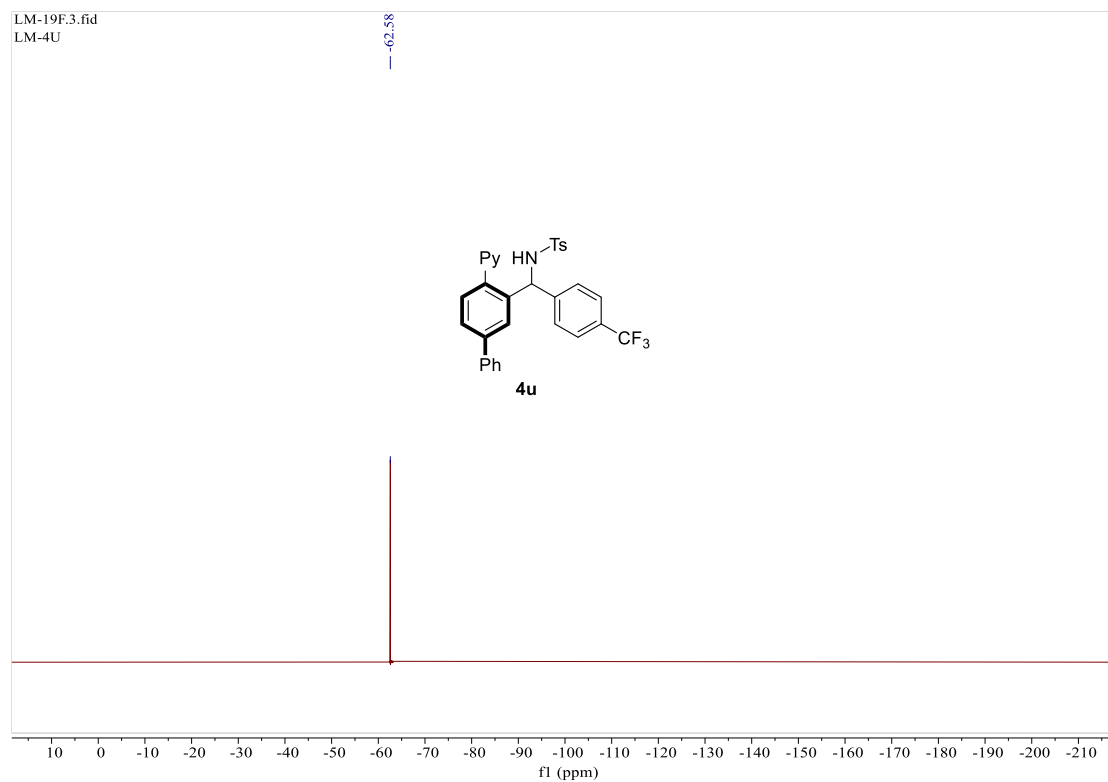

<sup>1</sup>H NMR (600 MHz, CDCl<sub>3</sub>) for **4v**

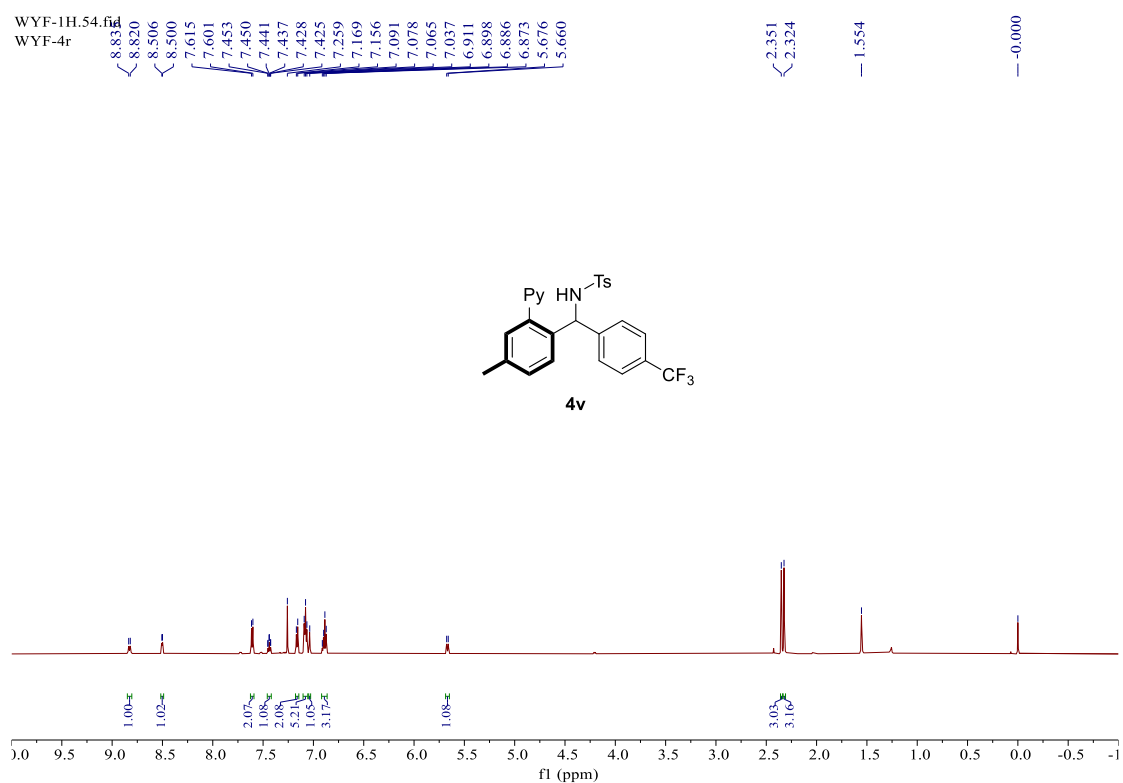

<sup>13</sup>C NMR (151 MHz, CDCl<sub>3</sub>) for **4v**

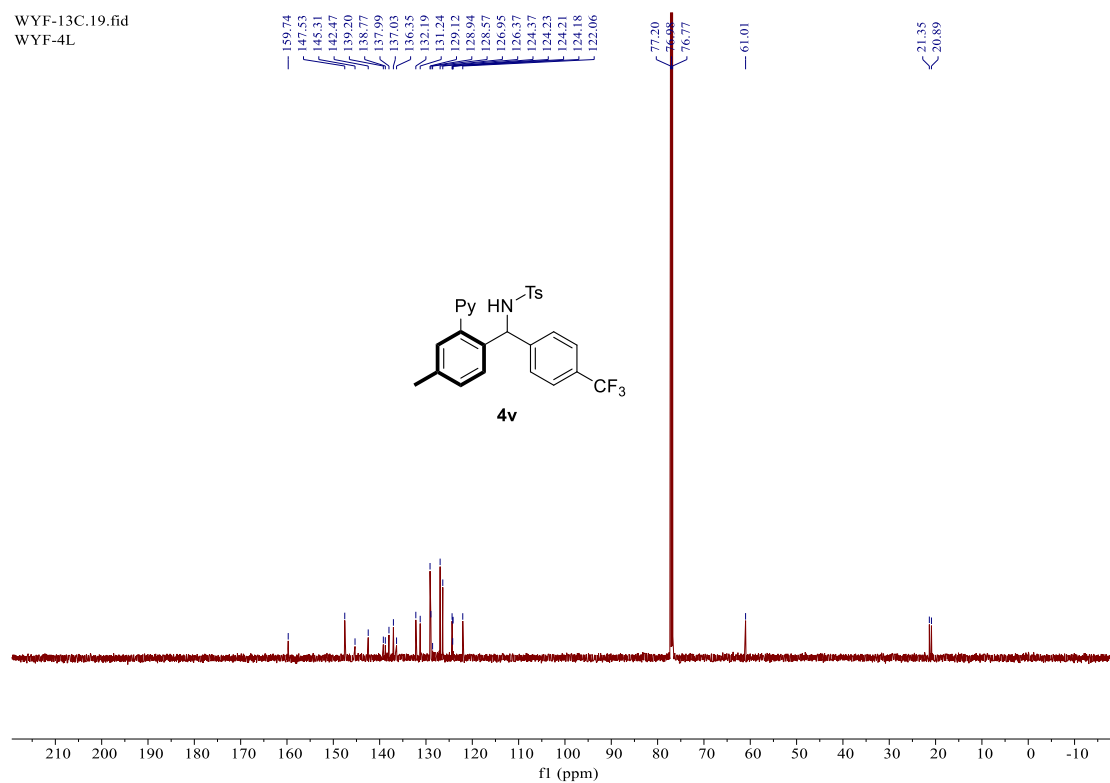

$^{19}\text{F}$  NMR (565 MHz,  $\text{CDCl}_3$ ) for **4v**

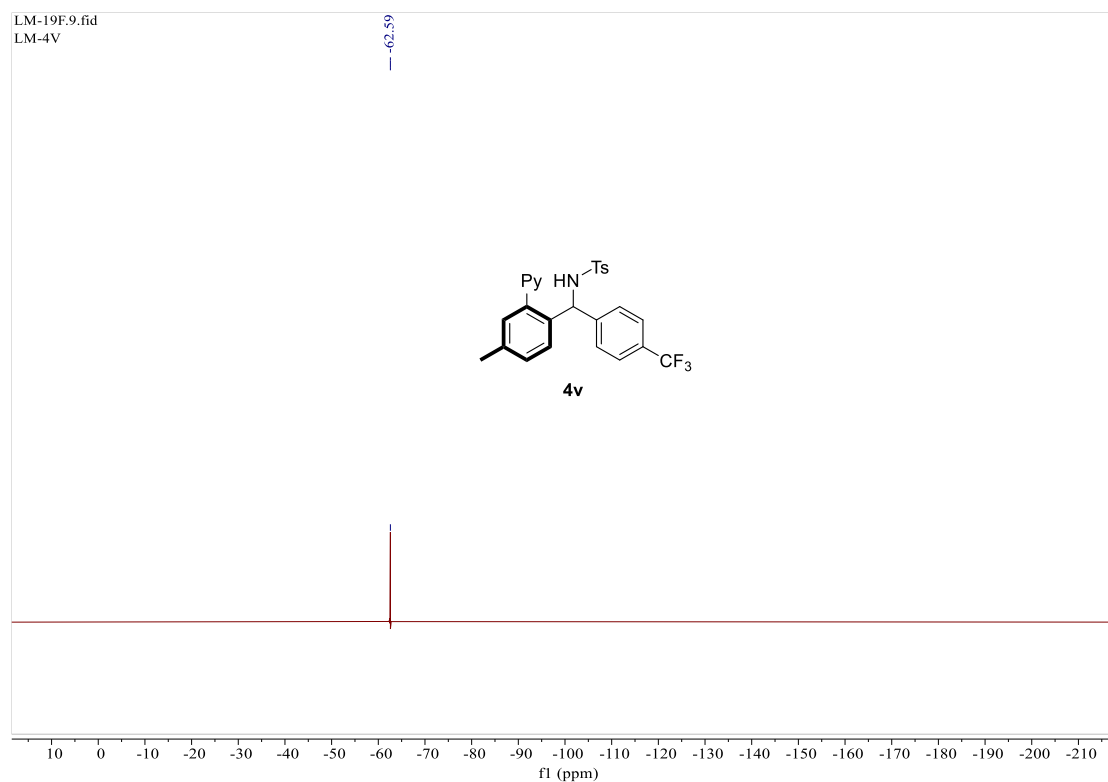

$^1\text{H}$  NMR (600 MHz,  $\text{CDCl}_3$ ) for **4w**

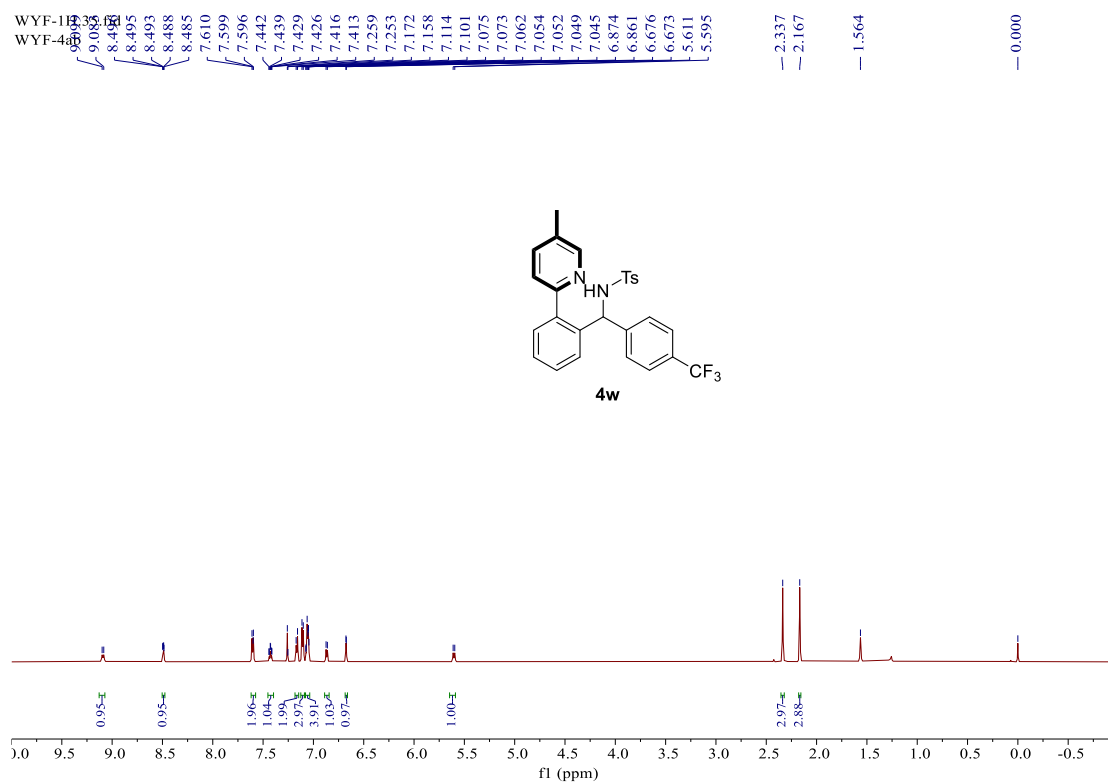

<sup>13</sup>C NMR (151 MHz, CDCl<sub>3</sub>) for **4w**

WYF-13C.13.fid  
WYF-4x

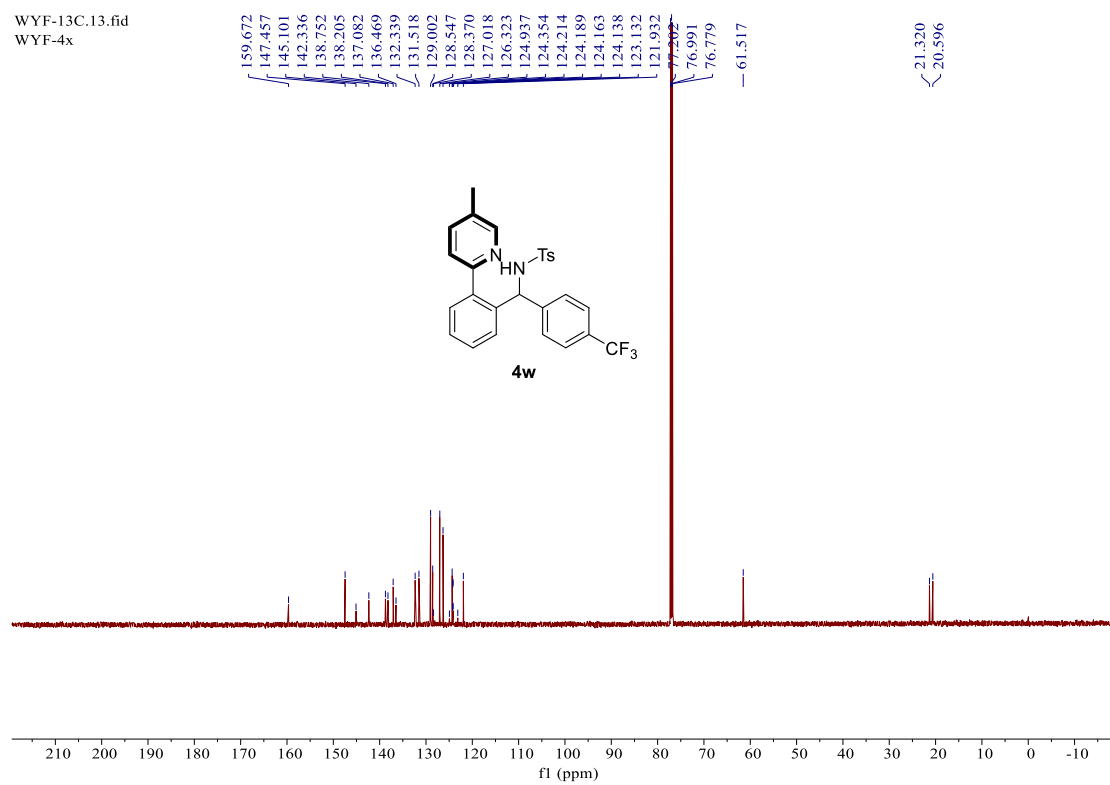

<sup>19</sup>F NMR (565 MHz, CDCl<sub>3</sub>) for **4w**

LM-19F.5.fid  
LM-4W

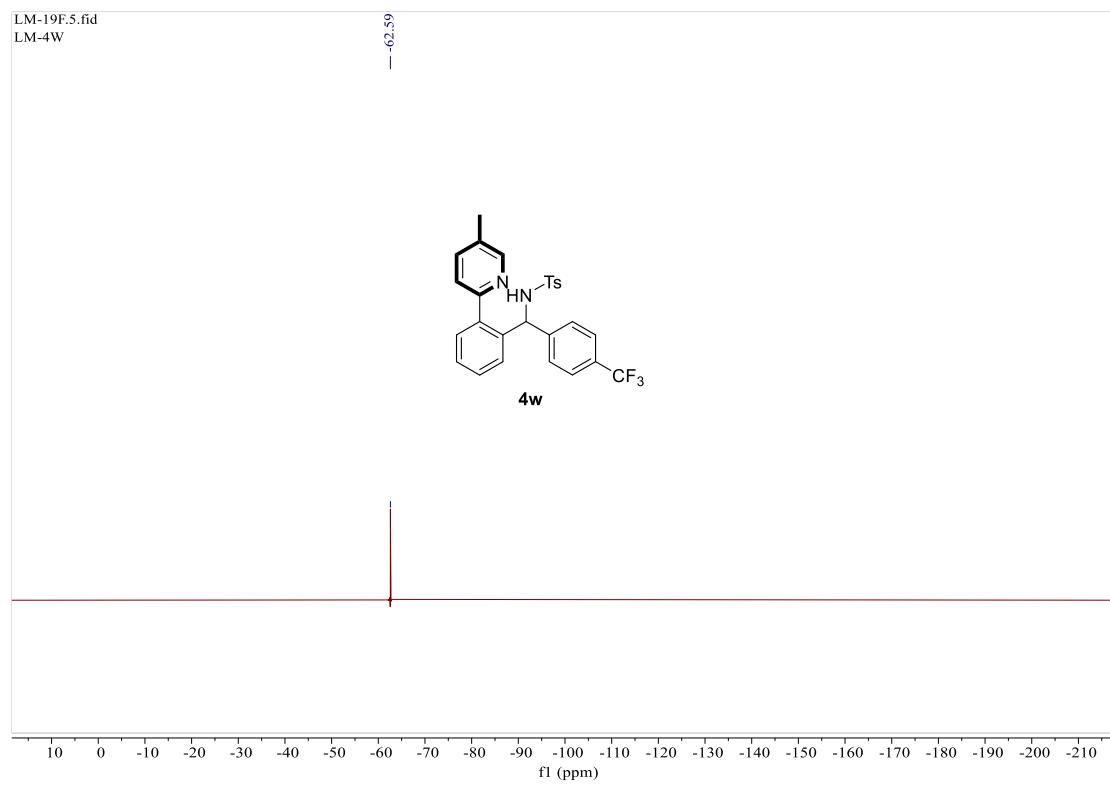

<sup>1</sup>H NMR (600 MHz, CDCl<sub>3</sub>) for **4x**

WYF-1H.53.fid  
WYF-4ae

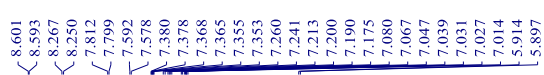

2.346

1.562

1.256

-0.000

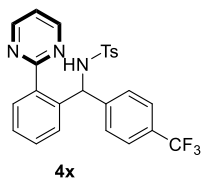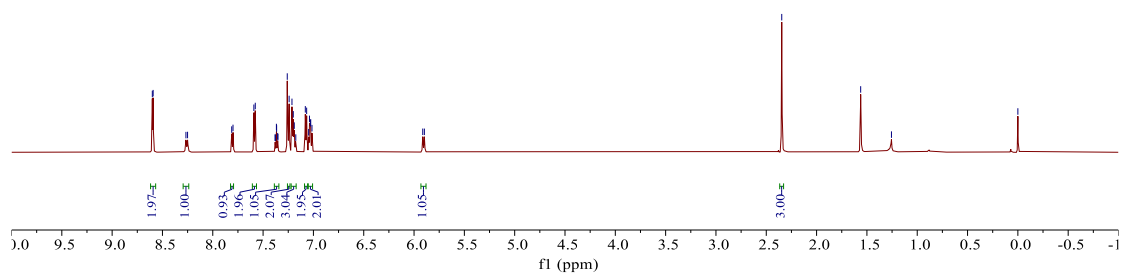

<sup>13</sup>C NMR (151 MHz, CDCl<sub>3</sub>) for **4x**

WYF-13C.21.fid  
WYF-4AE

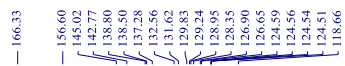

77.20  
76.98  
76.77

60.96

21.36

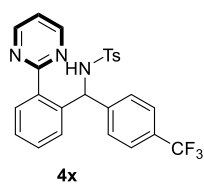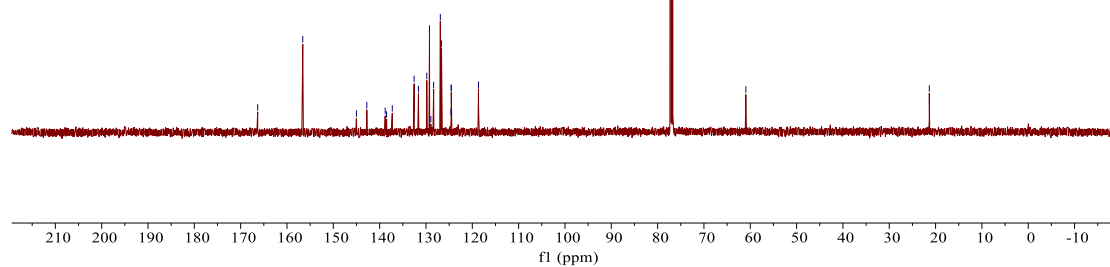

<sup>19</sup>F NMR (565 MHz, CDCl<sub>3</sub>) for **4x**

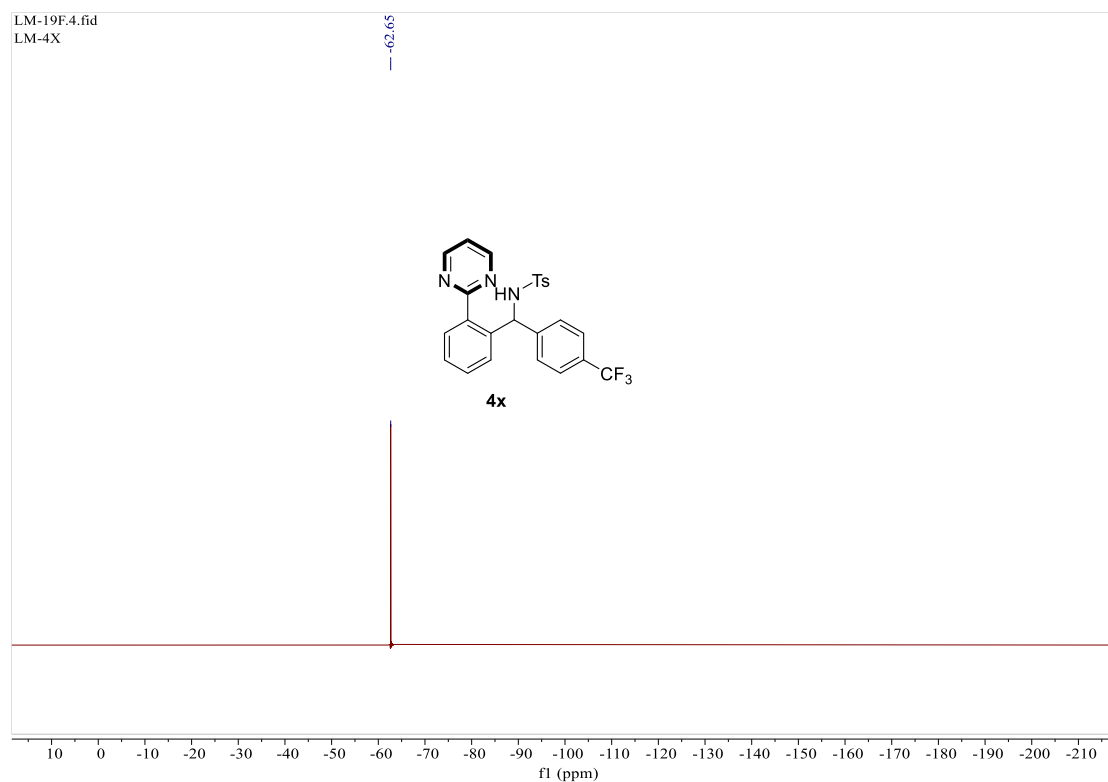

<sup>1</sup>H NMR (600 MHz, CDCl<sub>3</sub>) for **4y**

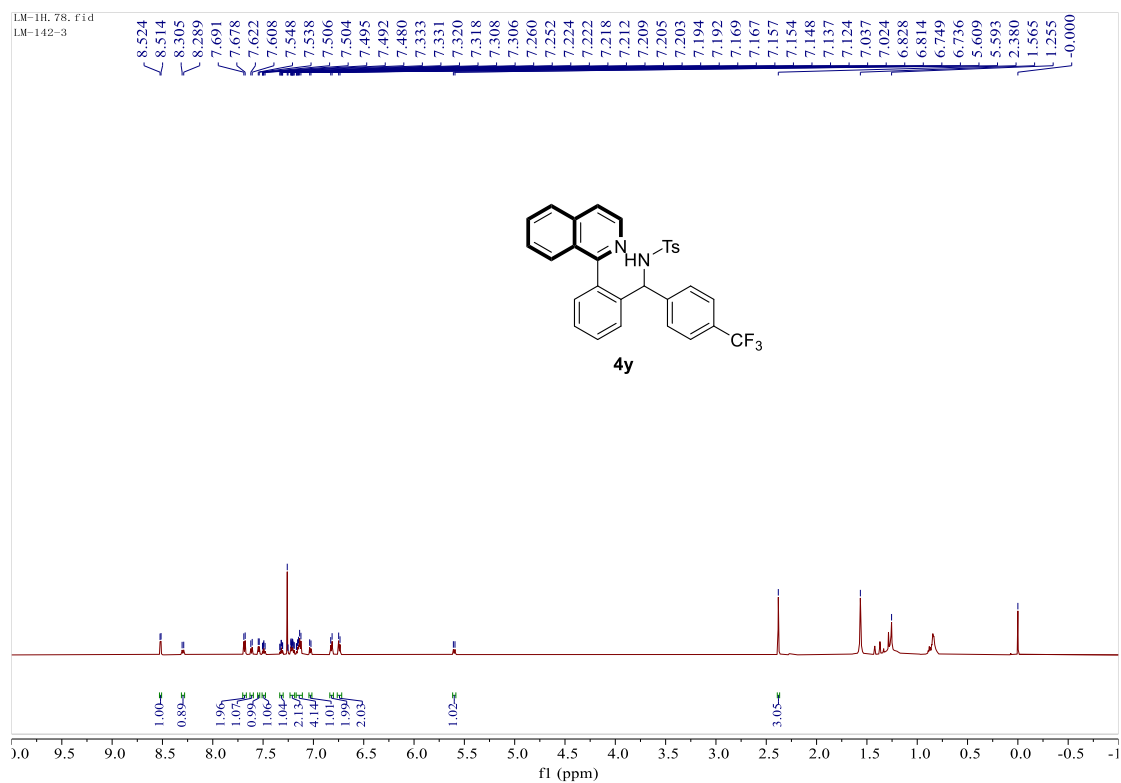

<sup>13</sup>C NMR (151 MHz, CDCl<sub>3</sub>) for **4y**

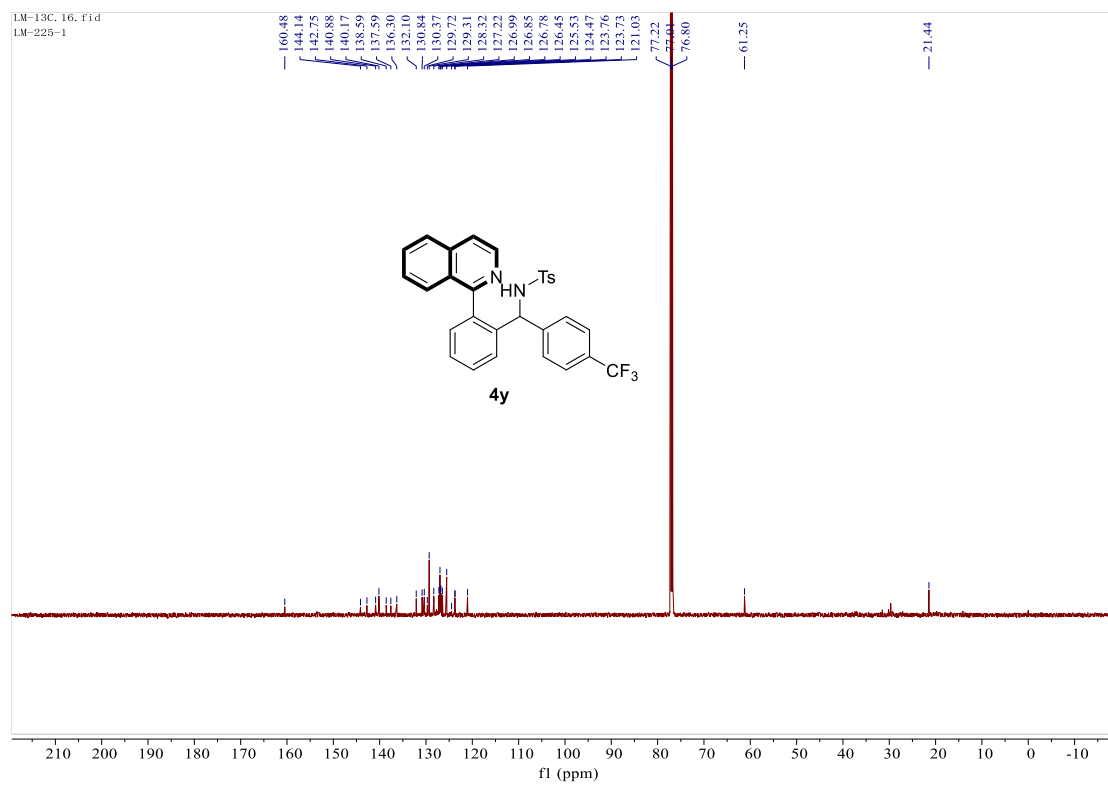

<sup>19</sup>F NMR (565 MHz, CDCl<sub>3</sub>) for **4y**

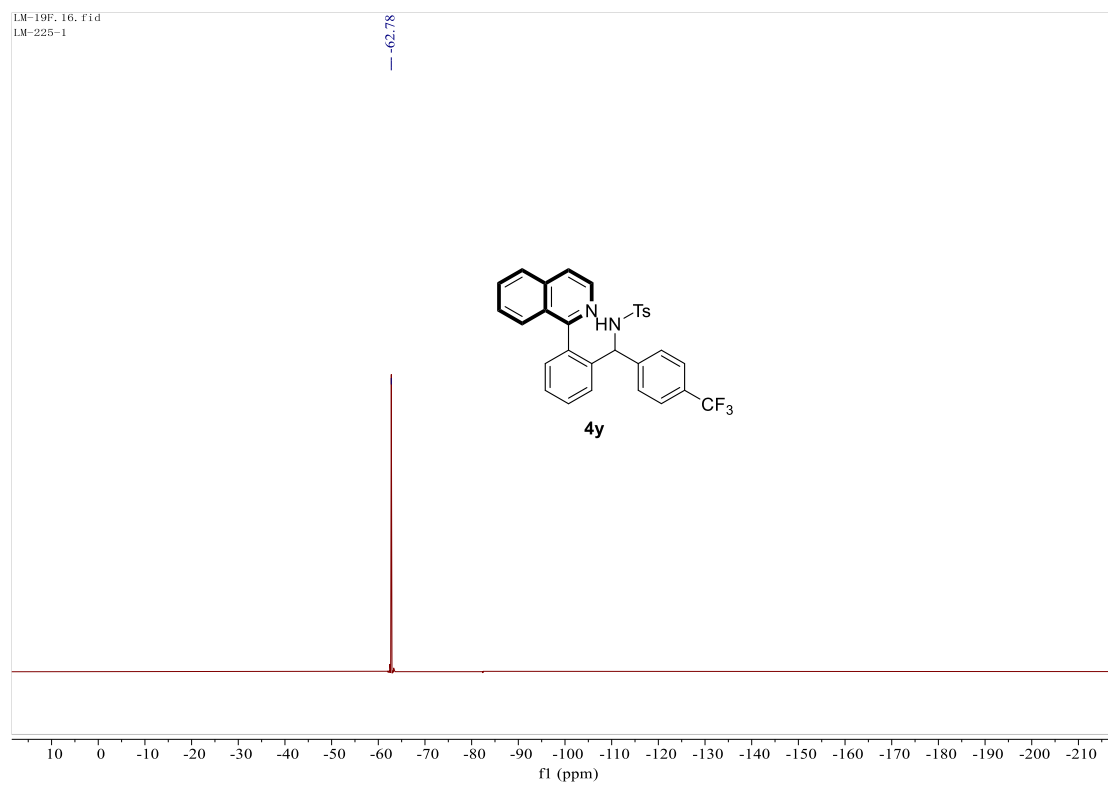



<sup>1</sup>H NMR (600 MHz, CDCl<sub>3</sub>) for **4z**

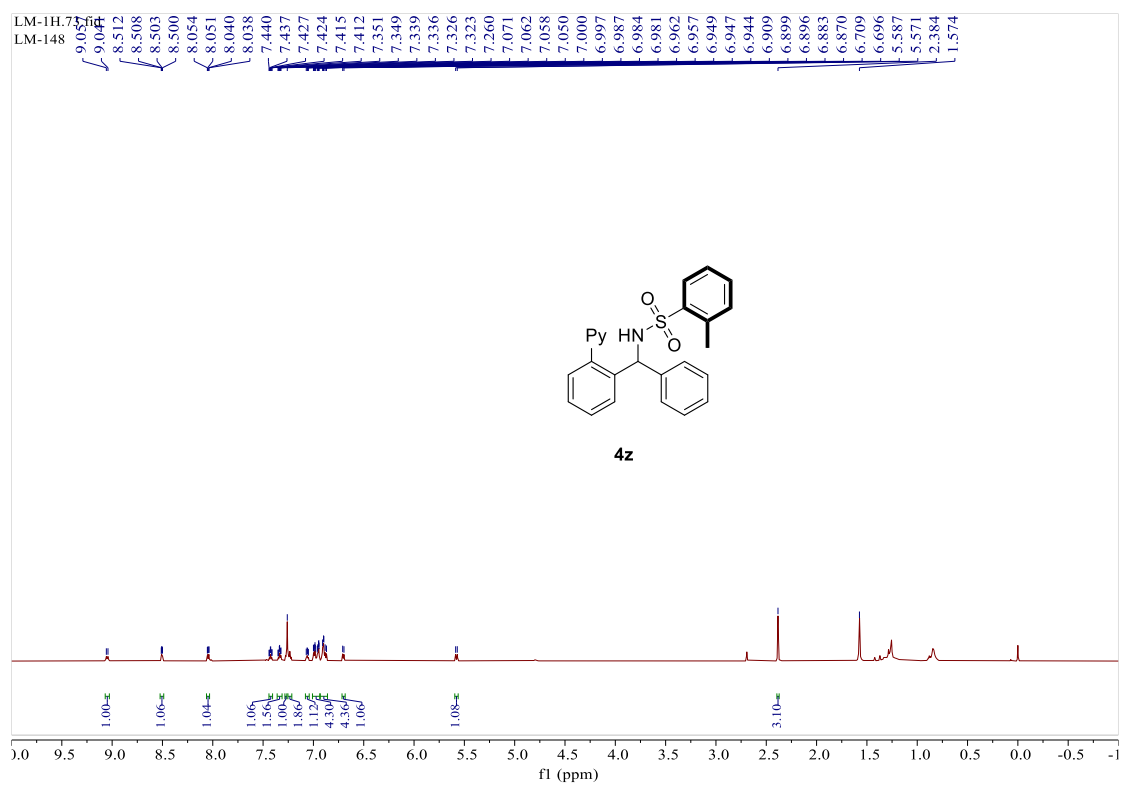

<sup>13</sup>C NMR (151 MHz, CDCl<sub>3</sub>) for **4z**

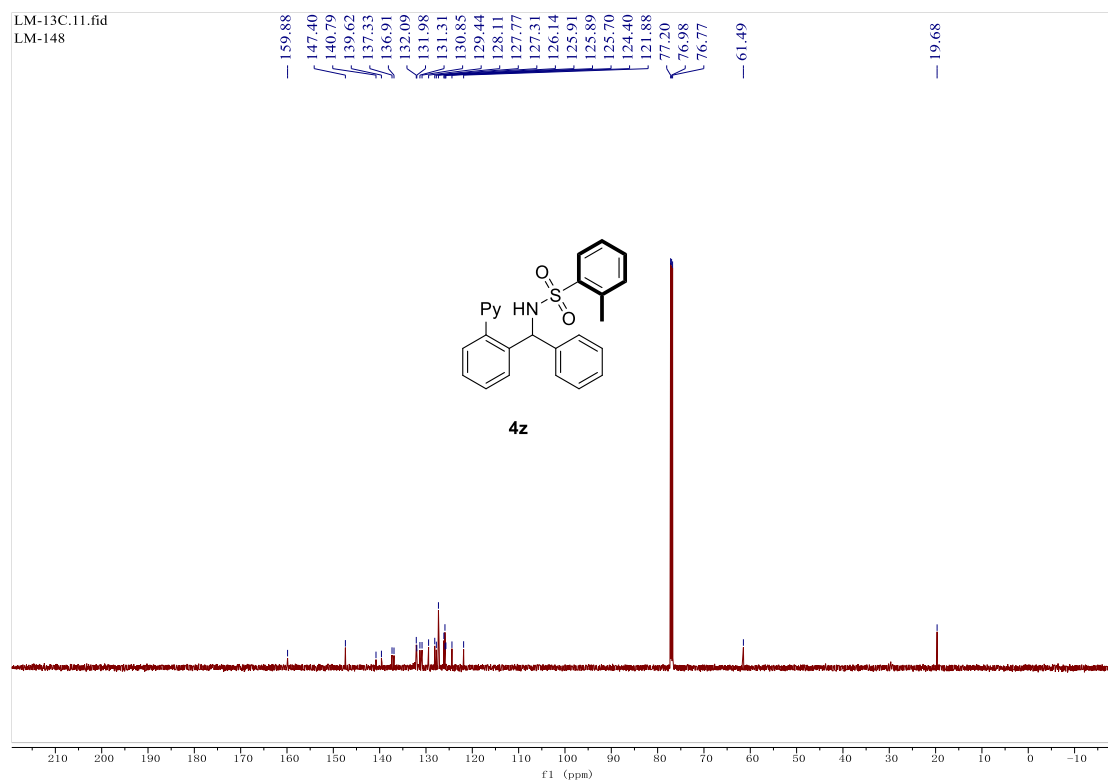

<sup>1</sup>H NMR (600 MHz, CDCl<sub>3</sub>) for **4aa**

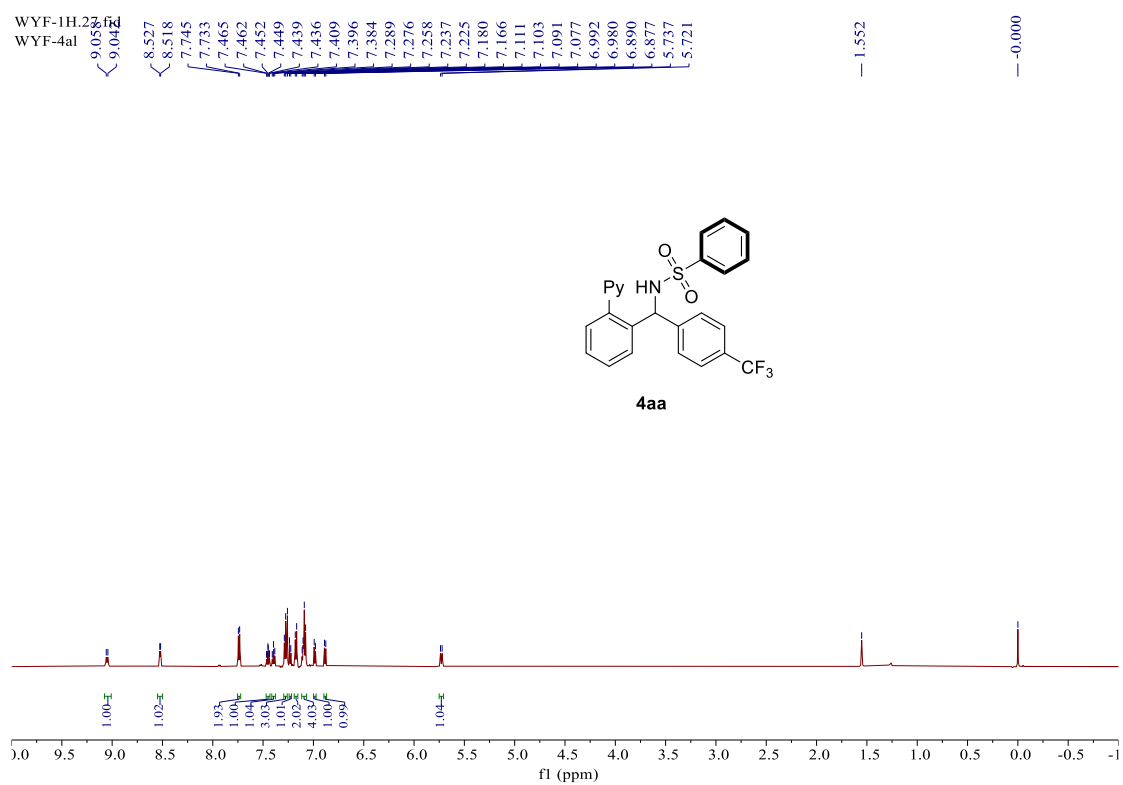

<sup>13</sup>C NMR (151 MHz, CDCl<sub>3</sub>) for **4aa**

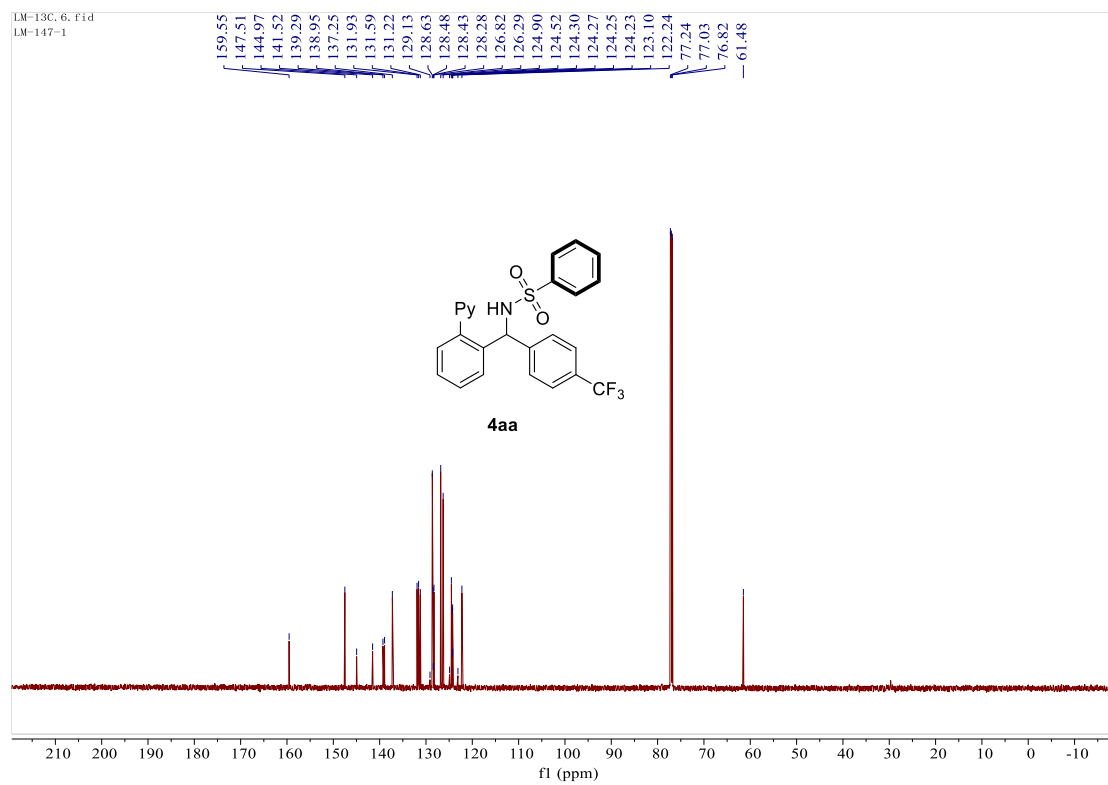

<sup>19</sup>F NMR (565 MHz, CDCl<sub>3</sub>) for **4aa**

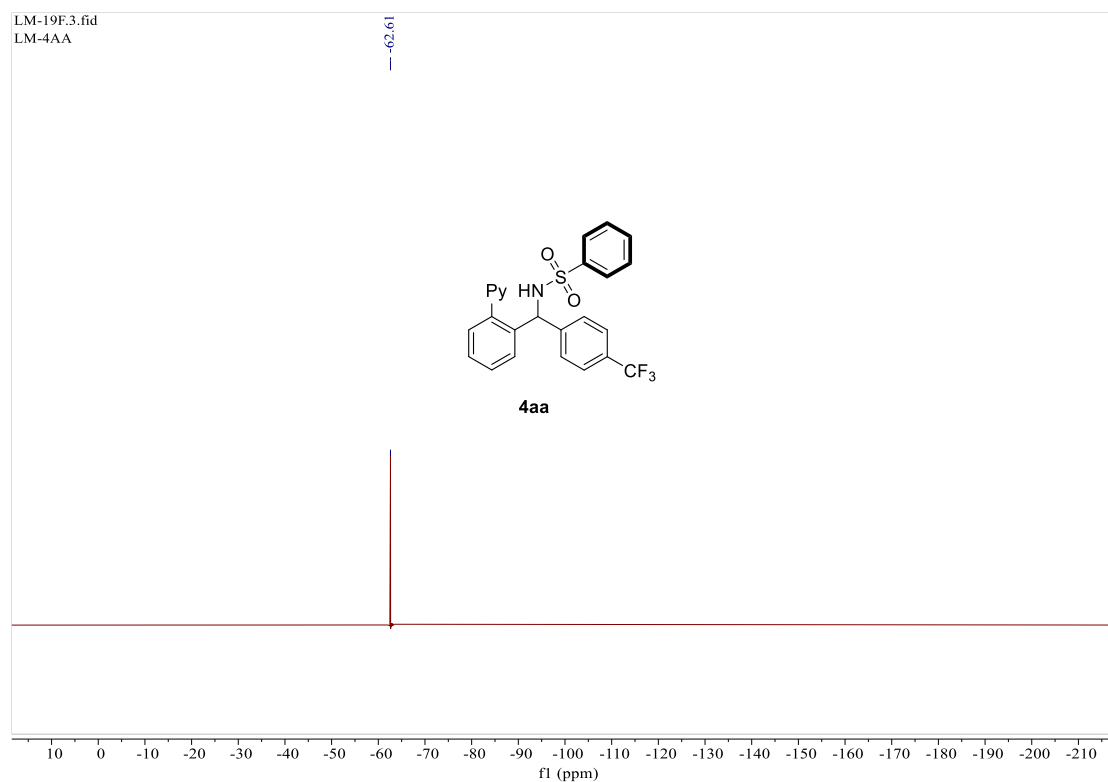

<sup>1</sup>H NMR (600 MHz, CDCl<sub>3</sub>) for **4ab**

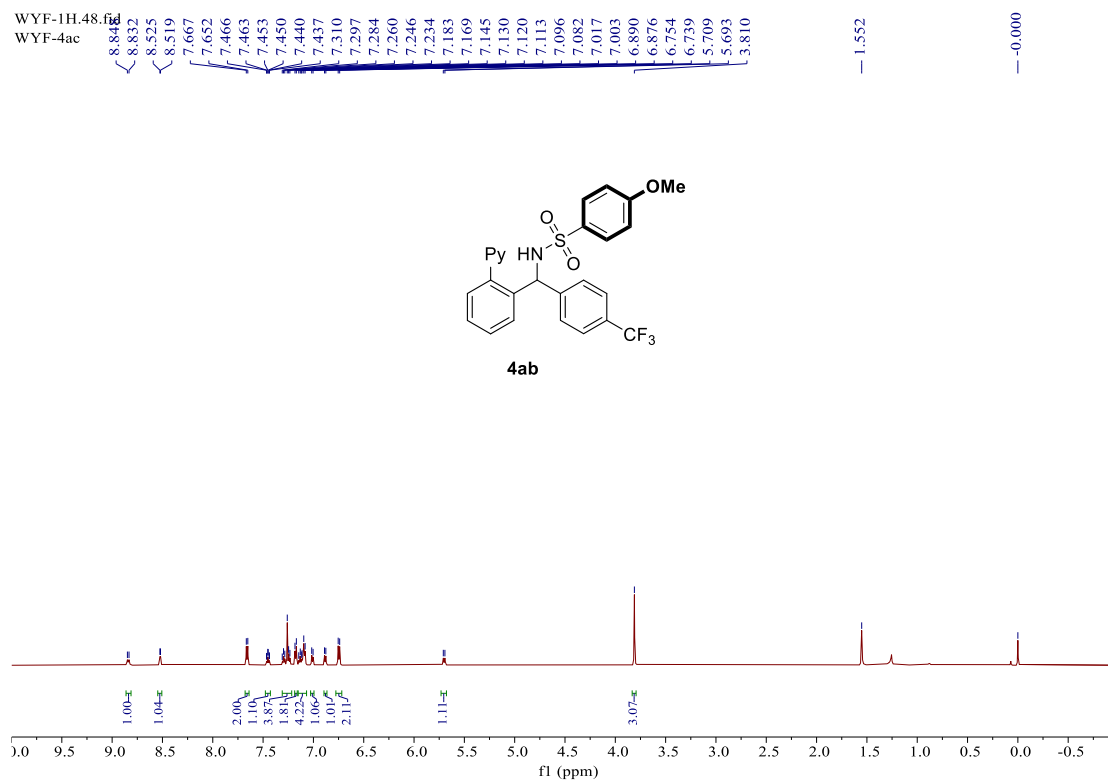

<sup>13</sup>C NMR (151 MHz, CDCl<sub>3</sub>) for **4ab**

WYF-13C.20.fid  
WYF-4AC

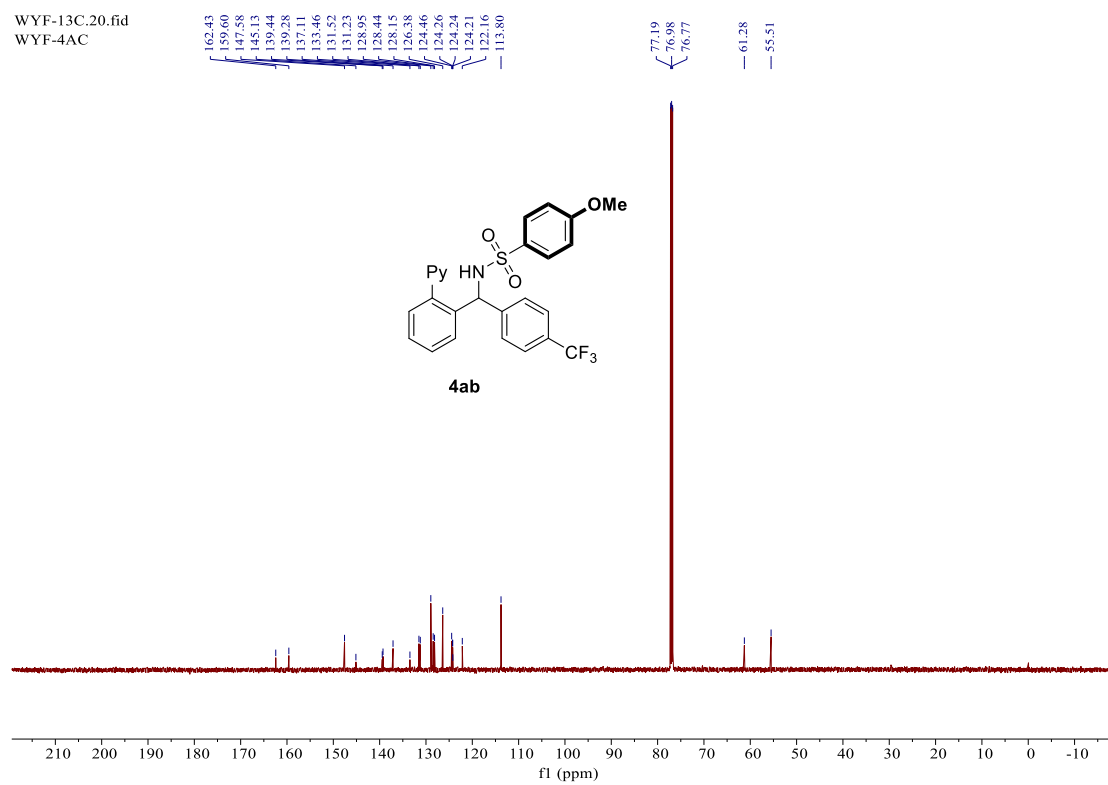

<sup>19</sup>F NMR (565 MHz, CDCl<sub>3</sub>) for **4ab**

LM-13C.19.fid  
LM-174-2 (19F)

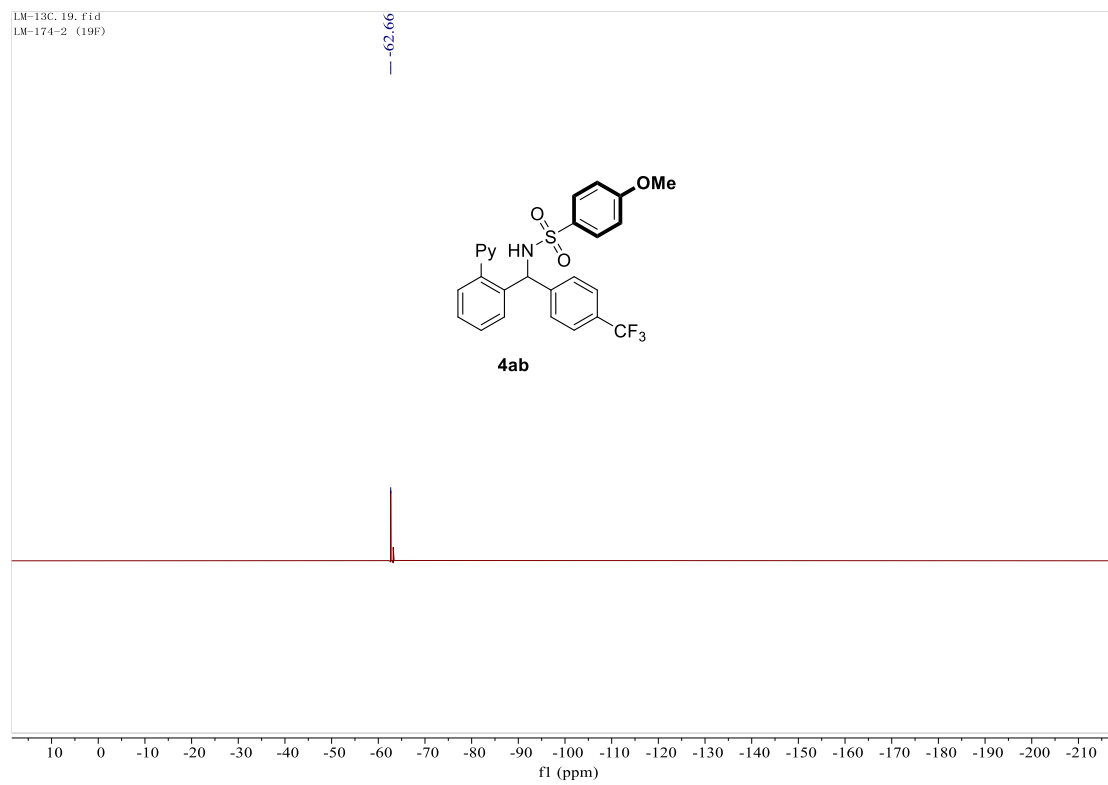

<sup>1</sup>H NMR (600 MHz, CDCl<sub>3</sub>) for **4ac**

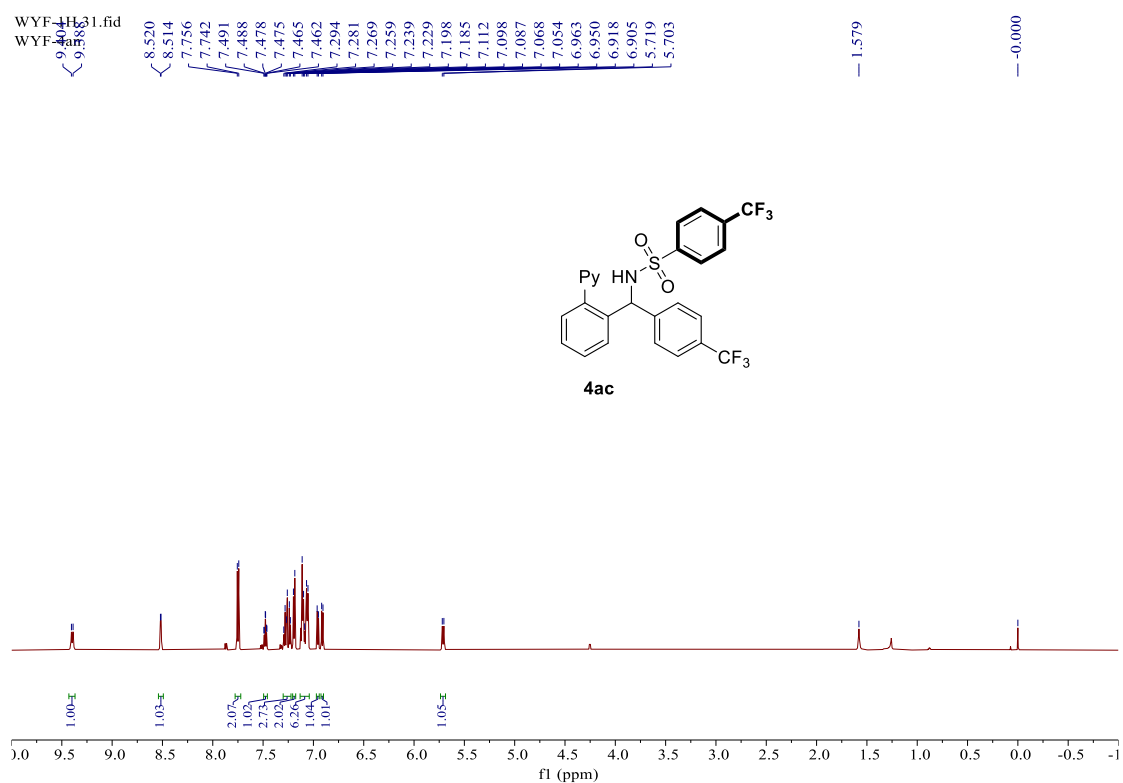

<sup>13</sup>C NMR (151 MHz, CDCl<sub>3</sub>) for **4ac**

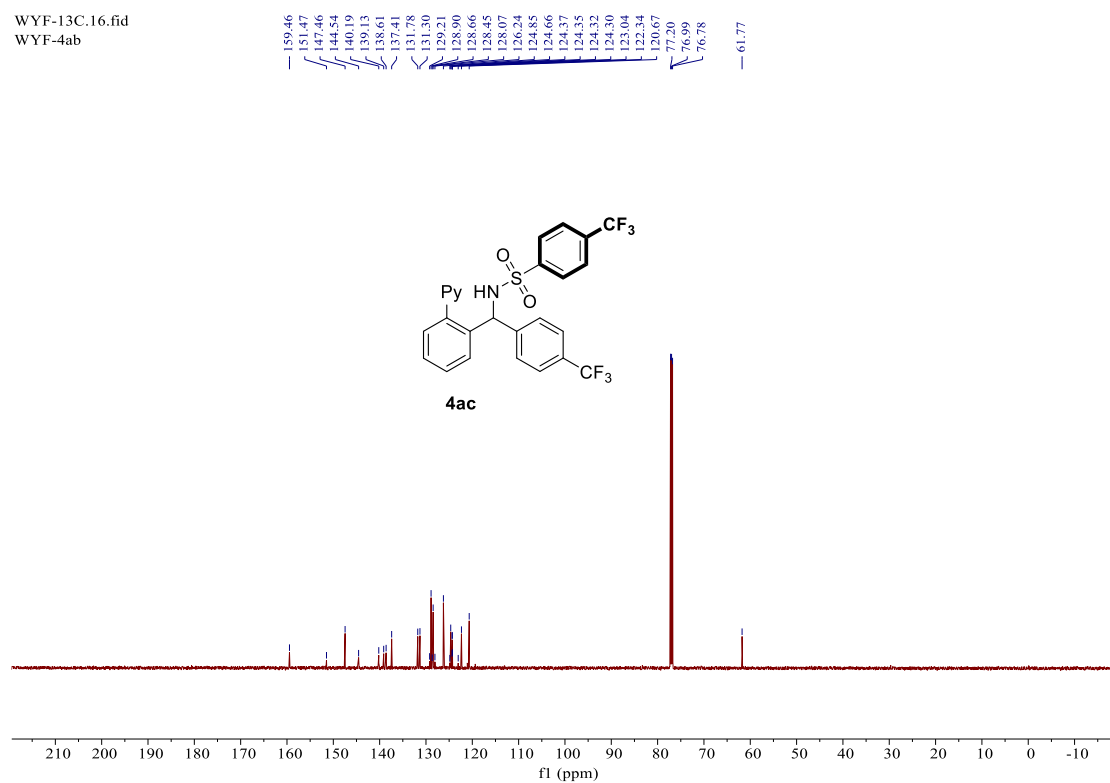

<sup>19</sup>F NMR (565 MHz, CDCl<sub>3</sub>) for **4ac**

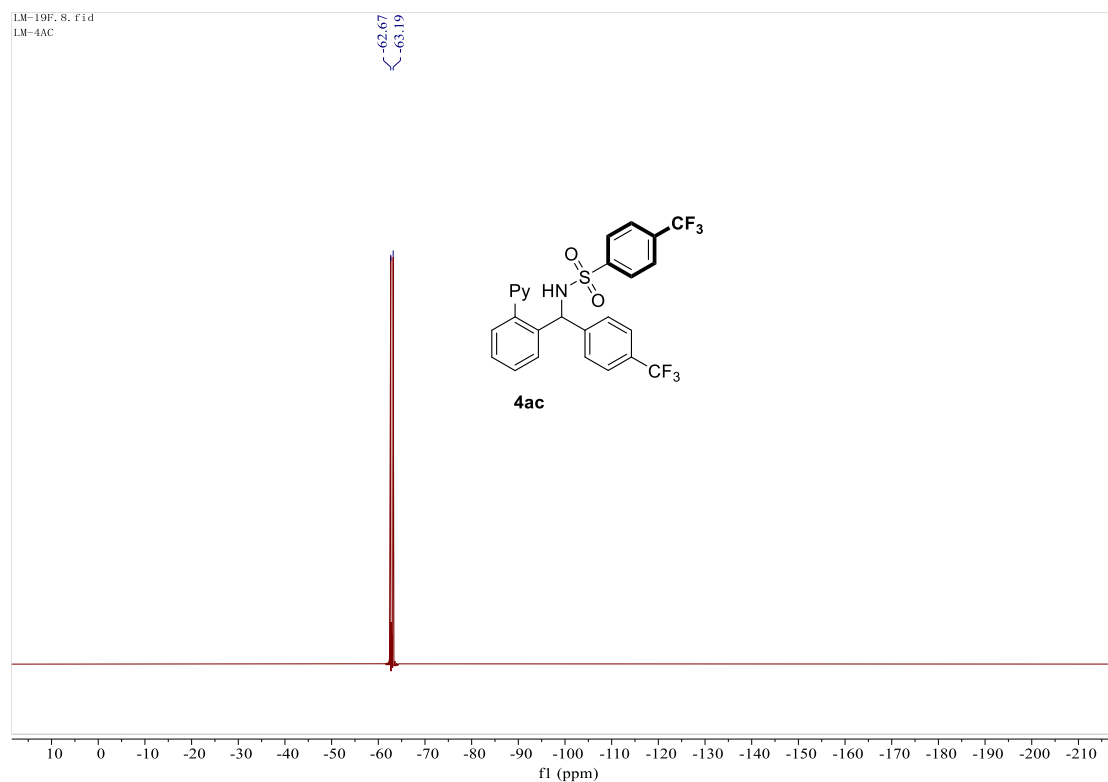

<sup>1</sup>H NMR (600 MHz, CDCl<sub>3</sub>) for **4ad**

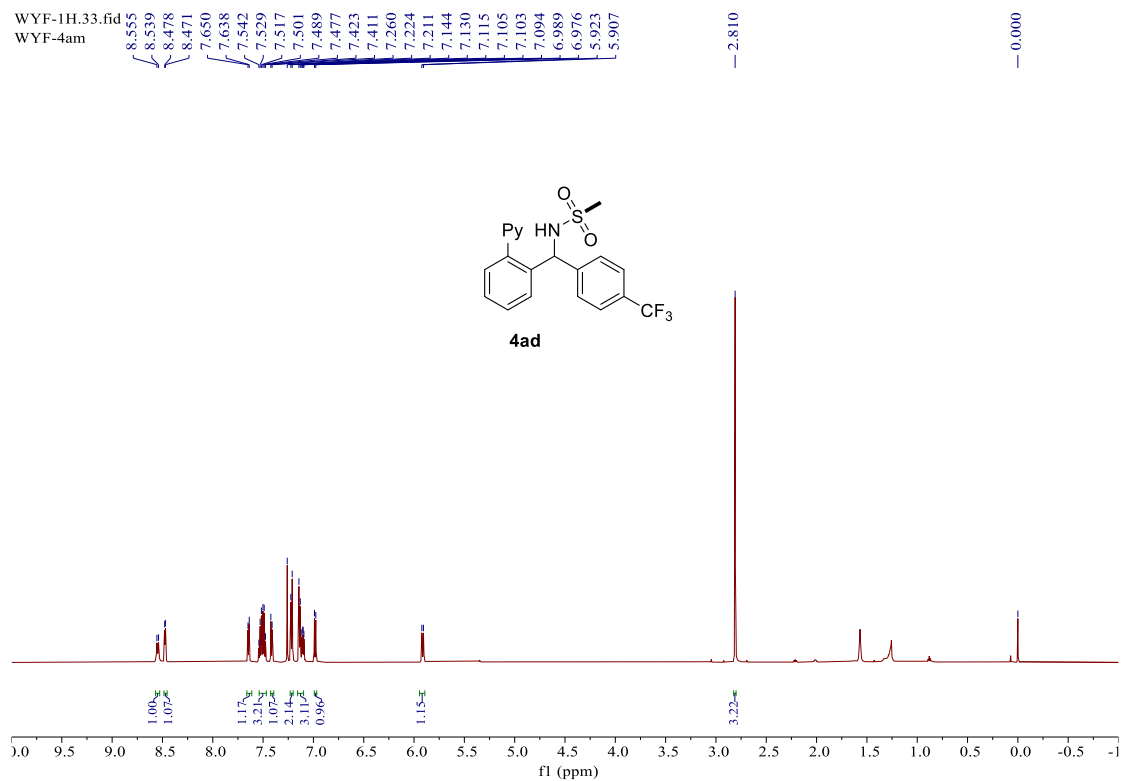

<sup>13</sup>C NMR (151 MHz, CDCl<sub>3</sub>) for **4ad**

WYF-13C.15.fid  
WYF-4aa

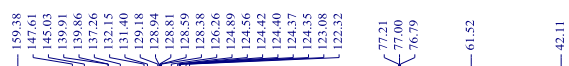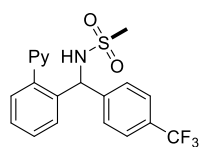

**4ad**

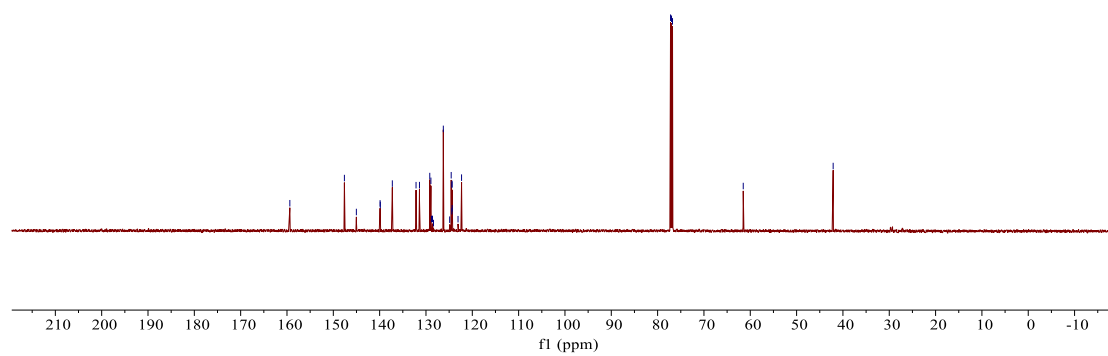

<sup>19</sup>F NMR (565 MHz, CDCl<sub>3</sub>) for **4ad**

LM-19F.7.fid  
LM-4AD

-62.63

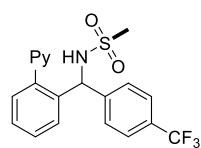

**4ad**

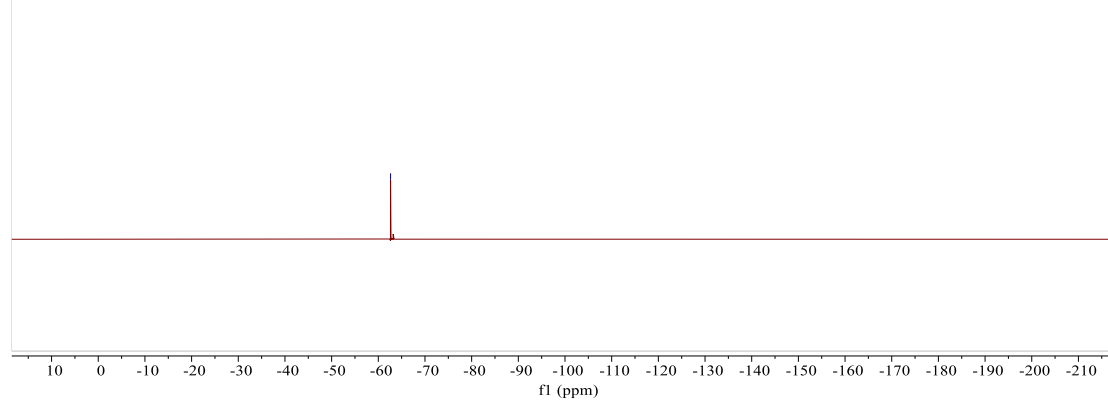

Supplement: d3cc04665f1.pdf [file d3cc04665f1.pdf]
